# Supplementary material
Source: publisher figshare collection journal article supplement (https://springernature.figshare.com/ndownloader/files/13103312)
Supplement: Supplementary file 1 [file 13103312]

| Item ID  | Short Title                                  | Title                                                                                                                                                                                                                                                     | Year | Full text unavailable or not in English | EXCLUDE on study design | EXCLUDE on subject | EXCLUDE on intervention | Intervention is similar to, but not SCP | EXCLUDE on outcomes | EXCLUDE on comparator | EXCLUDE as a review |
|----------|----------------------------------------------|-----------------------------------------------------------------------------------------------------------------------------------------------------------------------------------------------------------------------------------------------------------|------|-----------------------------------------|-------------------------|--------------------|-------------------------|-----------------------------------------|---------------------|-----------------------|---------------------|
| 33026130 | (2006)                                       | CEPF final project completion report: Putting Biodiversity Plans to Work                                                                                                                                                                                  | 2006 |                                         | *                       |                    |                         |                                         |                     | *                     |                     |
| 33026133 | (2011)                                       | Contribution of C.A.P.E. Business and Biodiversity Initiatives to conservation of critical biodiversity, landscape connectivity and ecological support areas: 2010 Baseline Report. A Green Choice Alliance project. Unpublished Project Report.          | 2011 |                                         | *                       |                    | *                       |                                         | *                   | *                     |                     |
| 33026132 | (2011)                                       | Implementation completion and results report (TF-53225): ZA-C.A.P.E.: Biodiversity Conservation and Sustainable Development Project                                                                                                                       | 2011 |                                         | *                       |                    |                         |                                         |                     | *                     |                     |
| 33026134 | (2012)                                       | Contribution of C.A.P.E. Business and Biodiversity Initiatives to conservation of critical biodiversity, landscape connectivity and ecological support areas: Post-baseline Assessment 2010. A Green Choice Alliance project. Unpublished Project Report. | 2012 |                                         | *                       |                    | *                       |                                         | *                   | *                     |                     |
| 33026128 | (2014)                                       | Western Cape Biodiversity Framework 2014 Status Update: Critical Biodiversity Areas of the Western Cape.                                                                                                                                                  | 2014 |                                         | *                       |                    |                         |                                         |                     | *                     |                     |
| 33026127 | (2016)                                       | The Biodiversity Network for the Cape Town Municipal Area. C-Plan & Marxan Analysis: 2016 Methods & Results                                                                                                                                               | 2016 |                                         | *                       |                    | *                       | *                                       | *                   | *                     |                     |
| 27955248 | A Conservation Plan... (Langlois)            | A Conservation Plan for Metasequoia in China                                                                                                                                                                                                              | 2005 | *                                       |                         |                    |                         |                                         |                     |                       |                     |
| 27955320 | A Design for Species Restoration... (Stukel) | A Design for Species Restoration-Development and Implementation of a Conservation Assessment and Conservation Strategy for Swift Fox in the United States                                                                                                 | 2003 | *                                       |                         |                    |                         |                                         |                     |                       |                     |
| 33026222 | A model for the Romanian... (Mirea)          | A model for the Romanian ecological network as a tool for sustainable development                                                                                                                                                                         |      |                                         | *                       |                    | *                       |                                         | *                   | *                     |                     |
| 27955191 | A Northern Spotted Owl... (Berbach)          | A Northern Spotted Owl Habitat Conservation Plan for California: Status and Lessons Learned                                                                                                                                                               | 1994 |                                         | *                       |                    | *                       | *                                       | *                   | *                     |                     |
| 33026281 | A science-based conservation... (1999)       | A science-based conservation assessment for the Klamath-Siskiyou Ecoregion                                                                                                                                                                                | 1999 |                                         | *                       |                    | *                       | *                                       | *                   | *                     |                     |
| 27935753 | A summary of conservation... (2011)          | A summary of conservation planning efforts in forested regions of the United States: 2010 update                                                                                                                                                          | 2011 | *                                       |                         |                    |                         |                                         |                     |                       |                     |
| 27929092 | Abbott (2012)                                | What are we protecting? Fisher behavior and the unintended consequences of spatial closures as a fishery management tool                                                                                                                                  | 2012 |                                         |                         |                    | *                       |                                         |                     |                       |                     |

|          |                                             |                                                                                                                                                                                        |      |   |   |   |   |   |   |   |  |
|----------|---------------------------------------------|----------------------------------------------------------------------------------------------------------------------------------------------------------------------------------------|------|---|---|---|---|---|---|---|--|
| 27927321 | Abecasis (2014)                             | Can small MPAs protect local populations of a coastal flatfish, <i>Solea senegalensis</i> ?                                                                                            | 2014 |   |   |   | * |   | * |   |  |
| 27929428 | Abellan (2011)                              | Efficiency of a Protected-Area Network in a Mediterranean Region: A Multispecies Assessment with Raptors                                                                               | 2011 |   |   |   | * |   | * |   |  |
| 27935021 | Abraham (2012)                              | Do terrestrial protected areas conserve freshwater fish diversity? Results from the Western Ghats of India                                                                             | 2012 |   |   |   | * |   |   |   |  |
| 27955322 | Accomplishments of the... (Sugden)          | Accomplishments of the Plum Creek Timber Company Native Fish Habitat Conservation Plan at 5 Years                                                                                      | 2007 | * |   |   |   |   |   |   |  |
| 27955209 | Achieving Multiple Objectives... (Erckmann) | Achieving Multiple Objectives With a Habitat Conservation Plan                                                                                                                         | 2001 | * |   |   |   |   |   |   |  |
| 27936958 | Adams (2008)                                | The use of contingent valuation for evaluating protected areas in the developing world: Economic valuation of Morro do Diabo State Park, Atlantic Rainforest, São Paulo State (Brazil) | 2008 |   | * |   | * |   | * | * |  |
| 27929849 | Adams (2010)                                | Opportunity costs: Who really pays for conservation?                                                                                                                                   | 2010 |   | * |   | * | * | * | * |  |
| 27932233 | Adams (2016)                                | Creating restoration landscapes: partnerships in large-scale conservation in the UK                                                                                                    | 2016 |   |   |   | * |   | * |   |  |
| 27939101 | Adjahosu (2016)                             | Effectiveness of protected areas for the conservation of favourable and priority habitats for valuable tree species in Benin                                                           | 2016 | * |   |   |   |   |   |   |  |
| 27932247 | Adjahosu (2016)                             | EFFECTIVENESS OF PROTECTED AREAS FOR THE CONSERVATION OF FAVOURABLE AND PRIORITY HABITATS FOR VALUABLE TREE SPECIES IN BENIN                                                           | 2016 | * |   |   |   |   |   |   |  |
| 27952086 | ADRA (2012)                                 | Modelling habitat suitability of Hazel Grouse ( <i>Bonasa Bonasia</i> ) in the context of human-induced change in Chartreuse                                                           | 2012 | * |   |   |   |   |   |   |  |
| 27930434 | Afonso (2008)                               | Social status determines behaviour and habitat usage in a temperate parrotfish: implications for marine reserve design                                                                 | 2008 |   | * |   | * |   | * | * |  |
| 27929486 | Agardy (2011)                               | Mind the gap Addressing the shortcomings of marine protected areas through large scale marine spatial planning                                                                         | 2011 |   | * | * | * |   | * | * |  |
| 27931944 | Agardy (2016)                               | 'Dangerous Targets' revisited: Old dangers in new contexts plague marine protected areas                                                                                               | 2016 |   | * |   | * |   | * | * |  |
| 27936446 | Ahern (2009)                                | Issues and methods for transdisciplinary planning of combined wildlife and pedestrian highway crossings                                                                                | 2009 | * |   |   |   |   |   |   |  |
| 27933886 | Alagador (2014)                             | Shifting protected areas: Scheduling spatial priorities under climate change                                                                                                           | 2014 |   | * |   | * | * | * | * |  |
| 27951669 | Alagona (2008)                              | The Coachella Valley multiple species habitat conservation plan: a decade of delays                                                                                                    | 2008 |   | * |   | * |   | * | * |  |
| 27936880 | Alkendi (2008)                              | A successful stakeholder partnership - The Dolphin Energy experience coral reef habitats of the Arabian Gulf                                                                           | 2008 | * |   |   |   |   |   |   |  |

|          |                               |                                                                                                                                                                                    |      |   |   |  |   |   |   |   |  |
|----------|-------------------------------|------------------------------------------------------------------------------------------------------------------------------------------------------------------------------------|------|---|---|--|---|---|---|---|--|
| 33026310 | Allen (2000)                  | The Draft Grassland Bird Conservation Plan: A Strategy for Protecting and Managing Grasslands and Associated Birds in California                                                   | 2000 |   | * |  | * |   | * | * |  |
| 27927225 | Almpandou (2014)              | Providing insights on habitat connectivity for male brown bears: A combination of habitat suitability and landscape graph-based models                                             | 2014 |   | * |  | * |   | * | * |  |
| 27969822 | Althaus (2016)                | Conservation of marine biodiversity on a very large deep continental margin: how representative is a very large offshore reserve network for deep-water octocorals?                | 2017 |   | * |  | * | * | * | * |  |
| 33026333 | Altman (2010)                 | Habitat and Population Objectives for Landbirds in Priority Upland and Riparian Habitats in the Puget Lowlands Ecoregion                                                           | 2009 |   | * |  | * |   | * | * |  |
| 27933021 | Alvarado (2016)               | Coral reefs of Isla del Coco National Park, Costa Rica: Structure and comparison (1987-2014)                                                                                       | 2016 | * |   |  |   |   |   |   |  |
| 27929687 | Ambastha (2010)               | Geospatial Analysis of Tamil Nadu Eastern Ghats Forest Types at Landscape level with reference to Fragmentation and Species Diversity                                              | 2010 |   | * |  | * |   | * | * |  |
| 33026265 | Americas (2009)               | Range-Wide Conservation Plan for Longleaf Pine                                                                                                                                     | 2009 |   | * |  | * |   | * | * |  |
| 33026323 | Amici (2009)                  | Selecting Focal Species in Ecological Network Planning following an Expert-Based Approach: A Case Study and a Conceptual Framework                                                 | 2009 |   | * |  | * |   | * | * |  |
| 27933654 | Amyot (2014)                  | Environmental Function Analysis: A decision support tool for integrated sandy beach planning                                                                                       | 2014 |   | * |  | * |   | * | * |  |
| 27955216 | An Overview of Bird... (Ford) | An Overview of Bird Conservation Planning and Integration                                                                                                                          | 2005 |   | * |  | * |   | * | * |  |
| 27931034 | Andersen (2004)               | Spatial risk assessment across large landscapes with varied land use: Lessons from a conservation assessment of military lands                                                     | 2004 |   | * |  | * |   | * | * |  |
| 27931158 | Anderson (2003)               | Waterbird populations at the Orange River mouth from 1980-2001: a re-assessment of its Ramsar status                                                                               | 2003 |   | * |  | * |   | * | * |  |
| 33026321 | Anderson (2006)               | The Northern Appalachian / Acadian Ecoregion : Conservation Assessment Status and Trends : 2006 Ecosystems Streams                                                                 | 2006 |   | * |  | * |   | * | * |  |
| 27930089 | Anderson (2009)               | Lessons for PPGIS from the application of a decision-support tool in the Nova Forest Alliance of Nova Scotia, Canada                                                               | 2009 |   | * |  | * | * | * | * |  |
| 27936477 | Anderson (2009)               | Using the biogeographical distribution and diversity of seaweed species to test the efficacy of marine protected areas in the warm-temperate Agulhas Marine Province, South Africa | 2009 |   |   |  | * |   | * |   |  |
| 27934138 | Andrew (2014)                 | Protected areas in boreal Canada: A baseline and considerations for the continued development of a representative and effective reserve network 1                                  | 2014 |   | * |  | * |   | * | * |  |
| 33026332 | Andrews (1993)                | Criteria for research natural area selection                                                                                                                                       | 1993 |   | * |  | * |   | * | * |  |

|          |                                                        |                                                                                                                                                                            |      |   |   |  |   |   |   |   |  |
|----------|--------------------------------------------------------|----------------------------------------------------------------------------------------------------------------------------------------------------------------------------|------|---|---|--|---|---|---|---|--|
| 27929520 | Angelsta<br>m (2011)                                   | Protecting Forest Areas for<br>Biodiversity in Sweden 1991-2010:<br>the Policy Implementation Process<br>and Outcomes on the Ground                                        | 2011 |   |   |  | * |   | * | * |  |
| 27933591 | Angheluț<br>ă (2015)                                   | Biodiversity and regional<br>development                                                                                                                                   | 2015 | * |   |  |   |   |   |   |  |
| 33026260 | Ann<br>(2005)                                          | Protected areas selection and the<br>LRMP process                                                                                                                          | 2005 |   | * |  | * |   | * | * |  |
| 27936766 | Apostolo<br>poulou<br>(2009)                           | Conceptual gaps in the national<br>strategy for the implementation of<br>the European Natura 2000<br>conservation policy in Greece                                         | 2009 |   |   |  | * |   |   |   |  |
| 27939284 | Aramde<br>(2014)                                       | Study of changes in habitat type<br>distribution and habitat structure of<br>Nech Sar National Park, Ethiopia.                                                             | 2014 |   | * |  | * |   | * | * |  |
| 28366815 | Arborvita<br>e, the<br>WWF/IU<br>CN...<br>(Author)     | Arborvitae, the WWF/IUCN Forest<br>Conservation Newsletter, issue 35:<br>Forest Conservation Tools                                                                         |      |   | * |  | * |   | * | * |  |
| 27934995 | Arcos<br>(2012)                                        | Assessing the location and stability<br>of foraging hotspots for pelagic<br>seabirds: An approach to identify<br>marine Important Bird Areas (IBAs)<br>in Spain            | 2012 |   | * |  | * |   | * | * |  |
| 27954528 | Arctic<br>National<br>Wildlife..<br>. (1988)           | Arctic National Wildlife Refuge final<br>comprehensive conservation plan,<br>environmental impact statement,<br>wilderness review, and wild river<br>plans                 | 1988 |   | * |  | * | * | * | * |  |
| 27926803 | Arkema<br>(2016)                                       | Embedding ecosystem services in<br>coastal planning leads to better<br>outcomes for people and nature                                                                      | 2016 |   | * |  |   |   |   | * |  |
| 27939764 | Armstro<br>ng<br>(2012)                                | Caribou conservation and recovery<br>in Ontario: development and<br>implementation of the caribou<br>conservation plan.                                                    | 2012 |   | * |  | * |   | * | * |  |
| 27928721 | Arponen<br>(2013)                                      | Improving conservation planning<br>for semi-natural grasslands:<br>Integrating connectivity into agri-<br>environment schemes                                              | 2013 |   | * |  | * | * | * | * |  |
| 27939710 | Aryal<br>(2012)                                        | Brown bear conservation action<br>plan in Nepal: efforts, challenges<br>and achievements.                                                                                  | 2012 |   | * |  | * |   | * | * |  |
| 27938822 | Aspinall<br>(1997)                                     | A wide-ranging conservation                                                                                                                                                | 1997 | * |   |  |   |   |   |   |  |
| 27951999 | Assessin<br>g the<br>Potential<br>...<br>(Rumap<br>ea) | Assessing the Potential of Using<br>Web-Based GIS and SDSS for<br>Spatial Plan Evaluation: Case of<br>Geonode and Distributed Spatial<br>Multi Criteria Evaluation (DSMCE) |      | * |   |  |   |   |   |   |  |
| 27931484 | Atauri<br>(2000)                                       | Assessment of nature conservation<br>scenarios: Species or landscape<br>structure? A case study in the<br>Madrid region (Spain)                                            | 2000 |   | * |  | * |   | * | * |  |
| 27929721 | Aubad<br>(2010)                                        | Human access and landscape<br>structure effects on Andean forest<br>bird richness                                                                                          | 2010 |   |   |  | * |   | * |   |  |
| 27951887 | Aubry<br>(2001)                                        | Using trend information to develop<br>the Quebec Shorebird<br>Conservation Plan                                                                                            | 2001 | * |   |  |   |   |   |   |  |
| 33026266 | Auman<br>(2003)                                        | Lower West Branch Susquehanna<br>River Conservation Plan                                                                                                                   | 2003 |   | * |  | * |   | * | * |  |
| 27970032 | Author<br>(1992)                                       | The African elephant conservation<br>review                                                                                                                                | 1992 | * |   |  |   |   |   |   |  |
| 27952077 | Author<br>(1992)                                       | Our countryside our future The way<br>forward for farming, wildlife and<br>rural communities                                                                               | 1992 | * |   |  |   |   |   |   |  |

|          |                  |                                                                                                                                                                                               |      |   |   |  |   |   |   |   |   |
|----------|------------------|-----------------------------------------------------------------------------------------------------------------------------------------------------------------------------------------------|------|---|---|--|---|---|---|---|---|
| 27952048 | Author (1993)    | Population biology of the loggerhead sea turtle (Caretta caretta) stocks in the Mediterranean Sea : population genetics, population dynamics, modelling, bases for a conservation plan        | 1993 | * |   |  |   |   |   |   |   |
| 27952051 | Author (1993)    | Space for nature in Middlesbrough A justification of the Middlesbrough nature conservation plan                                                                                               | 1993 | * |   |  |   |   |   |   |   |
| 27952076 | Author (1995)    | Local government reorganization Guidance to local authorities on conservation of the historic environment                                                                                     | 1995 | * |   |  |   |   |   |   |   |
| 27952053 | Author (2000)    | Kennet and Avon Canal conservation plan                                                                                                                                                       | 2000 | * |   |  |   |   |   |   |   |
| 27952045 | Author (2001)    | Wales spatial plan Pathway to sustainable development                                                                                                                                         | 2001 | * |   |  |   |   |   |   |   |
| 27970028 | Author (2003)    | Managing conservation areas : tools for setting priorities, measuring success and building local conservation capacity                                                                        | 2003 | * |   |  |   |   |   |   |   |
| 28366747 | Author (2006)    | Tropical Dry Forests                                                                                                                                                                          | 2006 |   | * |  | * |   | * | * |   |
| 28366718 | Author (2016)    | Marine No Net Loss: A feasibility assessment of implementing no net loss in the sea                                                                                                           | 2016 |   | * |  | * |   | * | * |   |
| 27939252 | Avantika (2015)  | Riparian forests for healthy rivers.                                                                                                                                                          | 2015 |   | * |  | * |   | * | * |   |
| 27952023 | Avcioğlu (2006)  | Conservation Planning and the Evaluation of Management Activity of Datça-Bozburun Peninsula                                                                                                   | 2006 | * |   |  |   |   |   |   |   |
| 27934420 | Aziz (2013)      | Prioritizing threats to improve conservation strategy for the tiger Panthera tigris in the Sundarbans Reserve Forest of Bangladesh                                                            | 2013 |   | * |  | * |   | * | * |   |
| 27928841 | Azzellino (2013) | A Marine Spatial Planning framework for the optimal siting of Marine Renewable Energy Installations: two Danish case studies.                                                                 | 2013 | * |   |  |   |   |   |   |   |
| 27937955 | Baelde (2005)    | Interactions between the implementation of marine protected areas and right-based fisheries management in Australia                                                                           | 2005 |   | * |  | * |   | * | * |   |
| 27937991 | Baier (2004)     | Nature Conservation Management on dry grassland sites in Sachsen-Anhalt - Investigation on threatening factors and development strategies in the nature reserve "Lämmerberg und Vockenwinkel" | 2004 | * |   |  |   |   |   |   |   |
| 27937742 | Bailey (2006)    | Maximising the natural capital benefits of habitat creation: Spatially targeting native woodland using GIS                                                                                    | 2006 |   | * |  | * |   | * | * |   |
| 27951813 | Baldwin (2007)   | The importance of Maine for ecoregional conservation planning                                                                                                                                 | 2007 |   | * |  |   |   | * | * |   |
| 27951095 | Balmford (2003)  | Conservation planning in the real world: South Africa shows the way                                                                                                                           | 2003 |   |   |  |   |   |   |   | * |
| 27951100 | Ban (2009)       | Systematic marine conservation planning in data-poor regions: socioeconomic data is essential                                                                                                 | 2009 |   | * |  | * | * | * | * |   |
| 27930017 | Ban (2009)       | Comparing and Integrating Community-Based and Science-Based Approaches to Prioritizing Marine Areas for Protection                                                                            | 2009 |   | * |  | * | * | * | * |   |
| 27927092 | Ban (2014)       | Applying empirical estimates of marine protected area effectiveness to assess conservation plans in British Columbia, Canada                                                                  | 2014 |   |   |  | * | * | * |   |   |

|          |                     |                                                                                                                                                  |      |   |   |   |   |   |   |   |  |
|----------|---------------------|--------------------------------------------------------------------------------------------------------------------------------------------------|------|---|---|---|---|---|---|---|--|
| 27929844 | Banks (2010)        | Implementing marine reserve networks: A comparison of approaches in New South Wales (Australia) and New Zealand                                  | 2010 |   | * |   | * | * | * | * |  |
| 27934729 | Baral (2013)        | What makes grassroots conservation organizations resilient? An empirical analysis of diversity, organizational memory, and the number of leaders | 2013 |   | * |   | * |   | * | * |  |
| 27932789 | Barata (2016)       | Downscaling the gap: Protected areas, scientific knowledge and the conservation of amphibian species in Minas Gerais, Southeastern Brazil        | 2016 |   | * |   | * |   | * | * |  |
| 27929068 | Barber (2012)       | Dynamic performance assessment of protected areas                                                                                                | 2012 |   |   |   | * |   | * |   |  |
| 27929597 | Barcic (2011)       | ECOLOGICAL VALORISATION OF THE PROTECTED AREA OF "KOPACKI RIT" NATURE PARK                                                                       | 2011 | * |   |   |   |   |   |   |  |
| 27930424 | Bar-David (2008)    | Using spatially expanding populations as a tool for evaluating landscape planning: The reintroduced Persian fallow deer as a case study          | 2008 |   | * |   | * | * | * | * |  |
| 27940706 | Bare (2000)         | Cost impacts of management alternatives to achieve habitat conservation goals on state forestlands in western Washington.                        | 2000 |   | * | * | * |   | * | * |  |
| 27954512 | Bare (2000)         | Equitably treating individual Washington State Forest Trusts through consolidated management: a conceptual approach                              | 2000 | * |   |   |   |   |   |   |  |
| 27934061 | Barley (2014)       | Fishers' perception of a multiple-use marine protected area: Why communities and gear users differ at Mafia Island, Tanzania                     | 2014 |   |   |   | * |   | * |   |  |
| 27929576 | Barmuta (2011)      | Bridging the gap between 'planning' and 'doing' for biodiversity conservation in freshwaters                                                     | 2011 |   | * |   | * |   | * | * |  |
| 27937884 | Barnett (2005)      | Renewed hope for the threatened avian endemics of northeastern Brazil                                                                            | 2005 |   | * |   | * |   | * | * |  |
| 27933410 | Barnett (2015)      | Marine reserves can enhance ecological resilience                                                                                                | 2015 |   | * |   | * |   | * | * |  |
| 27928538 | Barr (2013)         | Are outcomes matching policy commitments in Australian marine conservation planning?                                                             | 2013 |   | * |   |   |   |   | * |  |
| 27931983 | Barr (2016)         | Progress in improving the protection of species and habitats in Australia                                                                        | 2016 |   |   |   | * |   | * |   |  |
| 27930886 | Barrows (2005)      | A framework for monitoring multiple-species conservation plans                                                                                   | 2005 |   | * |   | * |   | * | * |  |
| 27929447 | Barrows (2011)      | Identifying Habitat Linkages to Maintain Connectivity for Corridor Dwellers in a Fragmented Landscape                                            | 2011 |   | * |   | * |   | * | * |  |
| 27935408 | Barthod (2011)      | The green and blue threads - A project under the Grenelle environmental consultations relevant to foresters                                      | 2011 | * |   |   |   |   |   |   |  |
| 27939801 | Barthod (2011)      | The green and blue threads - a project under the Grenelle environmental consultations relevant to foresters.                                     | 2011 | * |   |   |   |   |   |   |  |
| 27936604 | Bartlett (2009)     | Marine reserve phenomenon in the Pacific islands                                                                                                 | 2009 |   | * |   | * |   | * | * |  |
| 27931940 | Bartuszevige (2016) | Landscape design: Integrating ecological, social, and economic considerations into conservation planning                                         | 2016 |   | * |   | * | * | * | * |  |

|          |                   |                                                                                                                                              |      |   |   |   |   |   |   |   |  |
|----------|-------------------|----------------------------------------------------------------------------------------------------------------------------------------------|------|---|---|---|---|---|---|---|--|
| 27936910 | Baskent (2008)    | Developing and implementing participatory and ecosystem based multiple use forest management planning approach (ETÇAP): Yalnızçam case study | 2008 |   | * |   | * | * | * | * |  |
| 27936941 | Baskent (2008)    | Developing and implementing multiple-use forest management planning in Turkey                                                                | 2008 |   | * |   | * | * | * | * |  |
| 27935804 | Bazelet (2011)    | Relative importance of management vs. design for implementation of large-scale ecological networks                                           | 2011 |   |   |   | * |   | * |   |  |
| 27933900 | Baziuke (2014)    | Developing a system for mapping sensitive marine areas                                                                                       | 2014 |   | * |   | * |   | * | * |  |
| 27952018 | Beal (1994)       | An evaluation of the USBR method of developing a water conservation plan                                                                     | 1994 | * |   |   |   |   |   |   |  |
| 27954490 | Beall (2008)      | Participatory modeling of endangered wildlife systems: Simulating the sage-grouse and land use in Central Washington                         | 2008 |   | * | * | * |   | * | * |  |
| 27951211 | Bean (1991)       | Reconciling conflicts under the Endangered Species Act: the habitat conservation planning experience                                         | 1991 | * |   |   |   |   |   |   |  |
| 27951509 | Beatley (1992)    | Balancing urban development and endangered species: the Coachella Valley habitat conservation plan                                           | 1992 |   | * |   | * |   | * | * |  |
| 27951052 | Beatley (2014)    | Habitat conservation planning: endangered species and urban growth                                                                           | 1994 |   | * |   | * |   | * | * |  |
| 27929897 | Beazley (2010)    | Integrating Expert Judgment into Systematic Ecoregional Conservation Planning                                                                | 2010 | * |   |   |   |   |   |   |  |
| 27929229 | Beckley (2012)    | A systematic evaluation of the incremental protection of broad-scale habitats at Ningaloo Reef, Western Australia                            | 2012 |   | * |   | * | * | * | * |  |
| 27951063 | Beger (2010)      | Conservation planning for connectivity across marine, freshwater, and terrestrial realms                                                     | 2010 |   | * | * | * |   | * | * |  |
| 27933418 | Behrooz (2015)    | Habitat modeling and conservation of the endemic latifi's viper ( <i>Montivipera latifii</i> ) in Lar National Park, Northern Iran           | 2015 |   | * |   | * |   | * | * |  |
| 33026338 | Bell (2004)       | Ecoregional conservation assessment of the Chihuahuan Desert                                                                                 | 2004 |   | * |   |   |   | * | * |  |
| 27939185 | Bell (2015)       | Use of remote sensing to produce a habitat map of Norfolk                                                                                    | 2015 |   | * |   | * |   | * | * |  |
| 33026322 | Bellamy (2001)    | A systems approach to the evaluation of natural resource management initiatives                                                              | 2001 |   | * |   | * |   | * | * |  |
| 27931134 | Benayas (2003)    | Identifying areas of high-value vertebrate diversity for strengthening conservation                                                          | 2003 |   | * |   | * |   | * | * |  |
| 33026336 | Benitez (1995)    | The Condor Bioserve: an innovative approach for conservation on montane ecosystems                                                           | 1995 |   | * |   | * |   | * | * |  |
| 27935953 | Benjamin (2010)   | The death of an elephant: Conservation discourses versus practices in Africa                                                                 | 2010 |   | * |   | * |   | * | * |  |
| 27938085 | Benkenhoff (2004) | Gastropod egg mass deposition on a temperate, wave-exposed coastline in New South Wales, Australia: Implications for intertidal conservation | 2004 |   | * |   | * |   | * | * |  |
| 27934623 | Beresford (2013)  | Protection Reduces Loss of Natural Land-Cover at Sites of Conservation Importance across Africa                                              | 2013 |   |   |   | * |   | * |   |  |

|          |                                      |                                                                                                                                                                  |      |   |   |  |   |   |   |   |  |
|----------|--------------------------------------|------------------------------------------------------------------------------------------------------------------------------------------------------------------|------|---|---|--|---|---|---|---|--|
| 27939544 | Bergsten (2013)                      | Protected areas in a landscape dominated by logging - a connectivity analysis that integrates varying protection levels with competition-colonization tradeoffs. | 2013 |   | * |  | * |   | * | * |  |
| 27938889 | Berke (1995)                         | Sustaining Jamaica's forests: The protected areas resource conservation project                                                                                  | 1995 |   | * |  | * |   | * | * |  |
| 27930159 | Berkhoff (2009)                      | Modeling Land Use Change: A GIS Based Modeling Framework to Support Integrated Land Use Planning (NabanFrame)                                                    | 2009 | * |   |  |   |   |   |   |  |
| 27938895 | Berkmüller (1995)                    | Recent Advances in Nature Conservation in the Lao PDR                                                                                                            | 1995 |   | * |  | * |   | * | * |  |
| 27951691 | Berliner (2005)                      | Systematic conservation planning for the forest biome of South Africa                                                                                            | 2005 |   | * |  | * | * | * | * |  |
| 27951391 | Berliner (2007)                      | Eastern Cape Biodiversity Conservation Plan: Technical Report                                                                                                    | 2007 |   | * |  |   |   | * | * |  |
| 28366698 | Bertzky (2010)                       | Carbon, biodiversity and ecosystem services: Exploring co-benefits Ecuador                                                                                       | 2010 |   | * |  | * |   | * | * |  |
| 27929430 | Bethel (2011)                        | Blending Geospatial Technology and Traditional Ecological Knowledge to Enhance Restoration Decision-Support Processes in Coastal Louisiana                       | 2011 |   | * |  | * |   | * | * |  |
| 27938331 | Betts (2002)                         | A landscape ecological approach to private woodlot planning in New Brunswick, Canada                                                                             | 2002 |   | * |  | * |   | * | * |  |
| 27951371 | Beyersbergen (2004)                  | Northern Prairie and Parkland waterbird conservation plan                                                                                                        | 2004 |   | * |  | * |   | * | * |  |
| 27926776 | Bino (2010)                          | Prioritizing Wetlands for Waterbirds in a Boom and Bust System: Waterbird Refugia and Breeding in the Murray-Darling Basin                                       | 2010 |   | * |  | * | * | * | * |  |
| 28987785 | Biodiversity conservation... (USAID) | Biodiversity conservation and forestry programs 2015 Report, fiscal year 2014 results and funding                                                                |      |   | * |  | * |   | * | * |  |
| 27939296 | Bitty (2015)                         | Cocoa farming and primate extirpation inside Cote d'Ivoire's protected areas.                                                                                    | 2015 |   |   |  | * |   | * |   |  |
| 27935823 | Bjorndal (2011)                      | Better science needed for restoration in the Gulf of Mexico                                                                                                      | 2011 |   | * |  | * |   | * | * |  |
| 27931655 | Blackstock (1996)                    | Biological components of Sites of Special Scientific Interest in Wales                                                                                           | 1996 |   |   |  | * |   | * | * |  |
| 27951849 | Blake (1993)                         | The leper shall dwell alone: Peel Island Lazaret conservation plan: a report for the Department of Environment and Heritage                                      | 1993 | * |   |  |   |   |   |   |  |
| 27926814 | Blau (2015)                          | Assessing the impact of a new approach to ocean management: Evidence to date from five ocean plans                                                               | 2015 |   | * |  |   |   |   | * |  |
| 27929586 | Blicharska (2011)                    | Road, forestry and regional planners' work for biodiversity conservation and public participation: a case study in Poland's hotspot regions                      | 2011 |   | * |  | * |   | * | * |  |
| 27935219 | Bode (2012)                          | Choosing cost-effective locations for conservation fences in the local landscape                                                                                 | 2012 |   | * |  | * | * | * | * |  |
| 27926835 | Bode (2015)                          | A conservation planning approach to mitigate the impacts of leakage from protected area networks                                                                 | 2015 |   | * |  | * |   | * | * |  |



|          |                     |                                                                                                                                                                                                      |      |   |   |  |   |   |   |   |  |
|----------|---------------------|------------------------------------------------------------------------------------------------------------------------------------------------------------------------------------------------------|------|---|---|--|---|---|---|---|--|
| 28366738 | Bodin (2014)        | Synergies between REDD+ and the Aichi Biodiversity targets in Central Africa - How spatial analysis can support the planning of forest policies for climate and biodiversity objectives              | 2014 |   | * |  | * |   | * | * |  |
| 27930473 | Boedhiartono (2007) | The principles of conservation and development: Do they apply in Malinau?                                                                                                                            | 2007 |   | * |  | * |   | * | * |  |
| 27935977 | Bohnet (2010)       | The contribution of modelling and stakeholder engagement to transdisciplinary landscape research: An exploration of the Landscapes Toolkit                                                           | 2010 |   | * |  | * |   | * | * |  |
| 33026212 | Bolivian (2004)     | Biodiversity Conservation at the Landscape Scale                                                                                                                                                     | 2004 |   | * |  | * |   | * | * |  |
| 27935165 | Bombi (2012)        | Amphibians conservation in Italy: The contribution of the WWF Oases network                                                                                                                          | 2012 |   | * |  | * | * | * | * |  |
| 27928672 | Bonanno (2013)      | Adaptive management as a tool to improve the conservation of endemic floras: the case of Sicily, Malta and their satellite islands                                                                   | 2013 |   | * |  | * |   | * | * |  |
| 27932071 | Boon (2016)         | The effect of contrasting threat mitigation objectives on spatial conservation priorities                                                                                                            | 2016 |   | * |  | * | * | * | * |  |
| 27938778 | Boothby (1997)      | Agri-environmental practice in the north west: pond and pondscape conservation in the Pond Life Project                                                                                              | 1997 | * |   |  |   |   |   |   |  |
| 27930129 | Boothroyd (2009)    | Ecological characteristics and management of geothermal systems of the Taupo Volcanic Zone, New Zealand                                                                                              | 2009 |   | * |  | * |   | * | * |  |
| 27938302 | Boshoff (2002)      | The potential distributions, and estimated spatial requirements and population sizes, of the medium to large-sized mammals in the planning domain of the Greater Addo Elephant National Park project | 2002 |   | * |  | * |   | * | * |  |
| 27933029 | Both (2016)         | CEUR Workshop Proceedings                                                                                                                                                                            | 2016 |   | * |  | * |   | * | * |  |
| 27929561 | Bottrill (2011)     | In Pursuit of Knowledge: Addressing Barriers to Effective Conservation Evaluation                                                                                                                    | 2011 |   |   |  | * |   | * | * |  |
| 33026202 | Bottrill (2012)     | Evaluating Perceived Benefits of Ecoregional Assessments                                                                                                                                             | 2012 |   |   |  |   |   |   | * |  |
| 27940056 | Boutin (2010)       | Special Section: Conservation planning within emerging global climate and economic realities.                                                                                                        | 2010 |   | * |  | * |   | * | * |  |
| 27940469 | Bowman (2006)       | An evaluation of spatial planning policy alignment in the Highlands and Islands.                                                                                                                     | 2006 | * |   |  |   |   |   |   |  |
| 27935690 | Boykin (2011)       | Spatial identification of statewide areas for conservation focus in New Mexico: Implications for state conservation efforts                                                                          | 2011 |   | * |  | * | * | * | * |  |
| 27930647 | Breeze (2007)       | Designing management measures to protect cold-water corals off Nova Scotia, Canada                                                                                                                   | 2007 |   | * |  | * |   | * | * |  |
| 27932193 | Bridge (2016)       | Factors influencing incidental representation of previously unknown conservation features in marine protected areas                                                                                  | 2016 |   | * |  |   |   | * |   |  |
| 27930541 | Bried (2007)        | Umbrella potential of plants and dragonflies for wetland conservation: a quantitative case study using the umbrella index                                                                            | 2007 |   | * |  | * |   | * | * |  |
| 27938661 | Brito (1999)        | Management strategies for conservation of the lizard <i>Lacerta schreiberi</i> in Portugal                                                                                                           | 1999 |   | * |  | * | * | * | * |  |

|          |                   |                                                                                                                                                                        |      |   |   |   |   |   |   |   |  |
|----------|-------------------|------------------------------------------------------------------------------------------------------------------------------------------------------------------------|------|---|---|---|---|---|---|---|--|
| 27931006 | Brito (2004)      | Effectiveness of a reserve network for the conservation of the endemic marsupial <i>Micoureus travassosi</i> in Atlantic Forest remnants in southeastern Brazil        | 2004 |   |   |   | * |   | * | * |  |
| 27936810 | Brito (2008)      | Is the Atlantic Forest protected area network efficient in maintaining viable populations of <i>Brachyteles hypoxanthus</i> ?                                          | 2008 |   | * |   | * |   | * | * |  |
| 27932120 | Brito (2016)      | Conservation Biogeography of the Sahara-Sahel: additional protected areas are needed to secure unique biodiversity                                                     | 2016 |   | * |   | * | * | * | * |  |
| 27937535 | Brodie (2007)     | Combining management goals of wildlife habitat conservation and revenue on Washington State Trusts                                                                     | 2007 |   | * | * | * |   | * | * |  |
| 27935002 | Broekmeyer (2012) | Biodiversity compensation: A smart policy starts in time                                                                                                               | 2012 | * |   |   |   |   |   |   |  |
| 27931392 | Brooks (2001)     | Conservation priorities for birds and biodiversity: do East African Important Bird Areas represent species diversity in other terrestrial vertebrate groups?           | 2001 |   | * |   | * |   | * |   |  |
| 27930571 | Brooks (2007)     | Objectives and priorities for bird conservation and biodiversity in Africa                                                                                             | 2007 | * |   |   |   |   |   |   |  |
| 27929942 | Brooks (2009)     | Evaluating the Success of Conservation Actions in Safeguarding Tropical Forest Biodiversity                                                                            | 2009 |   | * |   | * |   | * | * |  |
| 33026327 | Brown (2001)      | United States Shorebird Conservation Plan                                                                                                                              | 2001 |   | * |   | * |   | * | * |  |
| 27931360 | Brown (2002)      | Waterbird use of Northern Atlantic wetlands protected under the North American Wetlands Conservation Act                                                               | 2002 |   |   |   | * |   | * |   |  |
| 27933504 | Brown (2015)      | Minimizing the short-term impacts of marine reserves on fisheries while meeting long-term goals for recovery                                                           | 2015 |   | * |   | * |   | * | * |  |
| 27951970 | Brown (2015)      | Is PPGIS good enough? An empirical evaluation of the quality of PPGIS crowd-sourced spatial data for conservation planning                                             | 2015 |   | * |   | * |   | * | * |  |
| 27951784 | Brownlie (2005)   | Systematic Conservation Planning in the Cape Floristic Region and Succulent Karoo, South Africa: enabling sound spatial planning and improved environmental assessment | 2005 |   | * |   |   |   |   | * |  |
| 27930051 | Brudvig (2009)    | Landscape connectivity promotes plant biodiversity spillover into non-target habitats                                                                                  | 2009 |   |   |   | * |   | * |   |  |
| 27928565 | Brugiere (2013)   | Biodiversity gap analysis of the protected area system in poorly-documented Chad                                                                                       | 2013 |   | * |   | * |   | * | * |  |
| 27926938 | Brun (2015)       | Analysis of deforestation and protected area effectiveness in Indonesia: A comparison of Bayesian spatial models                                                       | 2015 |   |   |   | * |   | * |   |  |
| 33026329 | Bryan (2000)      | An interactive spatial optimisation tool for systematic landscape restoration                                                                                          | 2000 |   | * | * | * |   | * | * |  |
| 27933673 | Bullimore (2014)  | Problems and pressures, management and measures in a site of marine conservation importance: Carmarthen Bay and Estuaries                                              | 2014 |   | * |   | * |   | * | * |  |
| 27927302 | Bunn (2014)       | Maximizing the Ecological Contribution of Conservation Banks                                                                                                           | 2014 |   |   |   | * |   | * | * |  |
| 27938488 | Burgman (2001)    | A method for setting the size of plant conservation target areas                                                                                                       | 2001 |   | * | * | * |   | * | * |  |

|          |                   |                                                                                                                                                                                                                                                        |      |   |   |   |   |   |   |   |  |
|----------|-------------------|--------------------------------------------------------------------------------------------------------------------------------------------------------------------------------------------------------------------------------------------------------|------|---|---|---|---|---|---|---|--|
| 27940723 | Burke (2000)      | Special issue. Gap analysis for landscape conservation.                                                                                                                                                                                                | 2000 |   | * | * | * |   | * | * |  |
| 27938873 | Burkhard (1996)   | Legal boundaries and fragmentation of Georgia's (USA) nature reserves                                                                                                                                                                                  | 1996 | * |   |   |   |   |   |   |  |
| 27931689 | BURLEY (1995)     | INTERNATIONAL GREENWAYS - A RED-RIVER VALLEY CASE-STUDY                                                                                                                                                                                                | 1995 |   |   |   | * |   | * |   |  |
| 27934811 | Busch (2013)      | Parks versus payments: Reconciling divergent policy responses to biodiversity loss and climate change from tropical deforestation                                                                                                                      | 2013 |   | * |   | * |   | * | * |  |
| 27969867 | Bustamante (2003) | Status report on metadata acquisition, analyses, and relevance: development of CAMS (Conservation Assessment Metadata System) as a tool for conservation assessments. A component of the Commonwealth Marine Conservation Assessment Program 2002-2004 | 2003 | * |   |   |   |   |   |   |  |
| 27935257 | Butchart (2012)   | Protecting important sites for biodiversity contributes to meeting global conservation targets                                                                                                                                                         | 2012 |   |   | * | * |   | * |   |  |
| 27936901 | Butler (2008)     | The Moray Firth Seal Management Plan: An adaptive framework for balancing the conservation of seals, salmon, fisheries and wildlife tourism in the UK                                                                                                  | 2008 |   | * |   | * |   | * | * |  |
| 27940312 | Butula (2008)     | Landscape evaluation and public preferences: is there room for optimisation?                                                                                                                                                                           | 2008 |   | * |   | * |   | * | * |  |
| 28366694 | Bystrakova (2004) | Bamboo Biodiversity: Africa, Madagascar and the Americas                                                                                                                                                                                               | 2004 |   | * |   | * |   | * | * |  |
| 27938494 | Cabeza (2001)     | Design of reserve networks and the persistence of biodiversity                                                                                                                                                                                         | 2001 |   | * | * | * |   | * | * |  |
| 27926731 | Cabral (2015)     | Designing a marine protected areas network in a data-limited situation                                                                                                                                                                                 | 2015 |   | * |   |   |   |   | * |  |
| 27929657 | Calado (2010)     | Marine spatial planning: Lessons learned from the Portuguese debate                                                                                                                                                                                    | 2010 |   |   |   | * | * | * |   |  |
| 27935462 | Calado (2011)     | Introducing a legal management instrument for offshore marine protected areas in the Azores-The Azores Marine Park                                                                                                                                     | 2011 |   | * |   | * |   | * | * |  |
| 27951824 | Calado (2013)     | The Portuguese maritime spatial plan                                                                                                                                                                                                                   | 2013 |   | * |   | * |   | * | * |  |
| 27938827 | Caldecott (1996)  | Designing conservation projects: people and biodiversity in endangered tropical environments                                                                                                                                                           | 1996 | * |   |   |   |   |   |   |  |
| 27927057 | Caldow (2015)     | Biogeographic assessments: A framework for information synthesis in marine spatial planning                                                                                                                                                            | 2015 |   | * |   | * |   | * | * |  |
| 27951985 | Callihan (2009)   | An Independent Evaluation of the US Fish and Wildlife Service's Habitat Conservation Plan Program                                                                                                                                                      | 2009 | * |   |   |   |   |   |   |  |
| 33026256 | CalPIF (2002)     | The oak woodland bird conservation plan                                                                                                                                                                                                                | 2002 |   | * |   | * |   | * | * |  |
| 33026337 | CalPIF (2004)     | The Coastal Scrub and Chaparral Bird Conservation Plan: a Strategy for Protecting and Managing Coastal Scrub and Chaparral Habitats and Associated Birds in California (J. Lovio, lead author)                                                         | 2004 |   | * |   | * |   | * | * |  |
| 27954423 | Camacho (2016)    | Lessons From Areawide, Multiagency Habitat Conservation Plans in California                                                                                                                                                                            | 2016 | * |   |   |   |   |   |   |  |

|          |                     |                                                                                                                                                                    |      |   |   |  |   |   |   |   |  |
|----------|---------------------|--------------------------------------------------------------------------------------------------------------------------------------------------------------------|------|---|---|--|---|---|---|---|--|
| 27936705 | Camargo (2009)      | Community involvement in management for maintaining coral reef resilience and biodiversity in southern Caribbean marine protected areas                            | 2009 |   |   |  | * |   | * |   |  |
| 27952067 | Cameroon (2005)     | Extinction risk from climate change, and a case study for conservation planning in Madagascar                                                                      | 2005 | * |   |  |   |   |   |   |  |
| 27952017 | Campa (2011)        | The Bay Delta Conservation Plan: a mid-course evaluation measuring best practices in collaboration                                                                 | 2011 |   |   |  | * |   | * | * |  |
| 27935358 | Campbell (2012)     | Prioritising the protection of habitat utilised by southern cassowaries <i>Casuarus casuaris johnsonii</i>                                                         | 2012 |   | * |  | * | * | * | * |  |
| 27929614 | Campedelli (2010)   | EFFECTIVENESS OF THE ITALIAN NATIONAL PROTECTED AREAS SYSTEM IN CONSERVATION OF FARMLAND BIRDS: A GAP ANALYSIS                                                     | 2010 |   | * |  | * | * | * | * |  |
| 27951445 | Camphuyzen (2011)   | Conservation plan for the Harbour Porpoise <i>Phocoena phocoena</i> in The Netherlands: towards a favourable conservation status                                   | 2011 |   | * |  | * |   | * | * |  |
| 27951521 | Cantú (2003)        | Conservation assessment of current and proposed nature reserves of Tamaulipas State, México                                                                        | 2003 | * |   |  |   |   |   |   |  |
| 27938783 | Carr (1997)         | Issues relevant to the design of marine reserves                                                                                                                   | 1997 | * |   |  |   |   |   |   |  |
| 27931140 | Carroll (2003)      | Use of population viability analysis and reserve selection algorithms in regional conservation plans                                                               | 2003 |   | * |  | * |   | * | * |  |
| 27933035 | Carter (2015)       | An evaluation of environmental, institutional and socio-economic factors explaining successful conservation plan implementation in the north-central United States | 2015 |   |   |  | * |   | * |   |  |
| 27940741 | Carvalho (1998)     | The role of natural corridors in cultivated landscape biodiversity.                                                                                                | 1998 | * |   |  |   |   |   |   |  |
| 27927194 | Casalegno (2014)    | Regional Scale Prioritisation for Key Ecosystem Services, Renewable Energy Production and Urban Development                                                        | 2014 |   | * |  | * | * | * | * |  |
| 27939692 | Caudron (2012)      | Early effects of the strategies of creating a genetic refuge and direct translocation for conserving and restoring populations of native brown trout.              | 2012 |   |   |  | * |   | * |   |  |
| 27931425 | Caziani (2001)      | Waterbird richness in Altiplano wetlands of northwestern Argentina                                                                                                 | 2001 |   | * |  | * |   | * | * |  |
| 27937523 | Ceballos (2007)     | Conservation priorities for mammals in megadiverse Mexico: The efficiency of reserve networks                                                                      | 2007 |   | * |  | * | * | * | * |  |
| 27930212 | Chan (2009)         | The payoff of conservation investments in tropical countryside                                                                                                     | 2009 |   | * |  | * |   | * | * |  |
| 27932072 | Chang (2016)        | Improving marine spatial planning by using an incremental amendment strategy: The case of Anping, Taiwan                                                           | 2016 |   | * |  | * |   | * | * |  |
| 33026286 | Change (2009)       | Lower Hunter Regional Conservation Plan                                                                                                                            | 2009 |   | * |  | * | * | * | * |  |
| 27929192 | Chapa-Vargas (2012) | Natural protected areas of San Luis Potosí, Mexico: ecological representativeness, risks, and conservation implications across scales                              | 2012 |   | * |  | * |   | * | * |  |
| 28366744 | Chape (2008)        | The World's Protected Areas: Status, Value and Prospects in the 21st Century                                                                                       | 2008 |   | * |  | * |   | * | * |  |
| 27932325 | Chauvenet (2017)    | Methods for calculating Protection Equality for conservation planning                                                                                              | 2017 |   | * |  | * |   | * | * |  |
| 27933308 | Chauvin (2015)      | South Puget Planning Unit, Washington, United States of America                                                                                                    | 2015 |   | * |  | * |   | * | * |  |

|          |                                           |                                                                                                                                                                                 |      |   |   |   |   |  |   |   |  |  |
|----------|-------------------------------------------|---------------------------------------------------------------------------------------------------------------------------------------------------------------------------------|------|---|---|---|---|--|---|---|--|--|
| 27940563 | Chen (2005)                               | Studies on diversity of spider community in Matoushan Natural Reserve in Jiangxi Province.                                                                                      | 2005 | * |   |   |   |  |   |   |  |  |
| 27940507 | Chen (2006)                               | Tolerance analysis of habitat loss for multispecies conservation in western Riverside County, California, USA.                                                                  | 2006 | * |   |   |   |  |   |   |  |  |
| 27951898 | Chen (2008)                               | Watershed of environment to integrate conservation plan measurement                                                                                                             | 2008 | * |   |   |   |  |   |   |  |  |
| 27932317 | Chen (2017)                               | Assessing the effectiveness of China's protected areas to conserve current and future amphibian diversity                                                                       | 2017 |   | * |   | * |  | * | * |  |  |
| 27931857 | Cheek (2009)                              | Sympathy for the Devil: Detailing the Effects of Planning-Unit Size, Thematic Resolution of Reef Classes, and Socioeconomic Costs on Spatial Priorities for Marine Conservation | 2009 |   | * | * | * |  | * | * |  |  |
| 27951645 | Chettri (2007)                            | Participatory conservation planning in Kangchenjunga transboundary biodiversity conservation landscape                                                                          | 2007 |   | * |   | * |  | * | * |  |  |
| 33026328 | Chettri (2007)                            | Developing Forested Conservation Corridors in the Kangchenjunga Landscape, Eastern Himalaya                                                                                     | 2007 |   | * |   | * |  | * | * |  |  |
| 27931458 | Chiappone (2000)                          | Marine reserve design criteria and measures of success: Lessons learned from the Exuma Cays Land and Sea Park, Bahamas                                                          | 2000 |   |   |   | * |  | * |   |  |  |
| 27929960 | Child (2009)                              | Assessing the broad-scale impact of agriculturally transformed and protected area landscapes on avian taxonomic and functional richness                                         | 2009 |   |   |   | * |  | * |   |  |  |
| 27951888 | Cho (2013)                                | Systematic study on the long-tailed goral ( <i>Naemorhedus caudatus</i> ), with ecology and conservation plan                                                                   | 2013 | * |   |   |   |  |   |   |  |  |
| 33026313 | Circumpolar protected d... (Conservation) | Circumpolar protected areas network (CPAN) - Strategy and Action plan                                                                                                           | 1996 |   | * |   | * |  | * | * |  |  |
| 27932242 | Cisneros - Montemayor (2016)              | Science, society, and flagship species: social and political history as keys to conservation outcomes in the Gulf of California                                                 | 2016 |   |   |   | * |  | * |   |  |  |
| 27938609 | Clark (2000)                              | Using spatial analysis to drive reserve design: A case study of a national wildlife refuge in Indiana and Illinois (USA)                                                        | 2000 |   | * |   |   |  | * | * |  |  |
| 27951891 | Clark (2007)                              | A marine conservation plan for the Agulhas Bioregion: options and opportunities for enhancing the existing MPA network                                                          | 2007 | * |   |   |   |  |   |   |  |  |
| 27930350 | Claudet (2008)                            | Marine reserves: size and age do matter                                                                                                                                         | 2008 |   |   |   | * |  | * |   |  |  |
| 27933585 | Clemann (2015)                            | Cold-blooded indifference: A case study of the worsening Status of threatened reptiles from Victoria, Australia                                                                 | 2015 |   | * |   | * |  | * | * |  |  |
| 27929737 | Coetzer (2010)                            | LAND-COVER CHANGE IN THE KRUGER TO CANYONS BIOSPHERE RESERVE (1993-2006): A FIRST STEP TOWARDS CREATING A CONSERVATION PLAN FOR THE SUBREGION                                   | 2010 |   | * |   | * |  | * |   |  |  |
| 27927462 | Coetzer (2014)                            | Reviewing Biosphere Reserves globally: effective conservation action or bureaucratic label?                                                                                     | 2014 |   | * |   | * |  | * | * |  |  |

|          |                                        |                                                                                                                                                                             |      |   |   |   |   |   |   |   |  |
|----------|----------------------------------------|-----------------------------------------------------------------------------------------------------------------------------------------------------------------------------|------|---|---|---|---|---|---|---|--|
| 27932581 | Coetzer-Hanack (2016)                  | Thresholds of change in a multi-use conservation landscape of South Africa: Historical land-cover, future transformation and consequences for environmental decision-making | 2016 |   |   |   | * |   | * |   |  |
| 33026255 | Cohansey River Corridor...             | Cohansey River Corridor Important Bird Area (IBA)                                                                                                                           | 2009 |   | * |   | * |   | * | * |  |
| 33026342 | Cohen (2016)                           | Pennsylvania Important Bird Areas                                                                                                                                           | 2004 |   | * |   | * |   | * | * |  |
| 27951519 | Cole (2000)                            | Framework for a conservation plan for the Agulhas Plain, Cape Floristic Region, South Africa                                                                                | 2000 | * |   |   |   |   |   |   |  |
| 27934151 | Coll  ter (2014)                       | Fishing inside or outside? A case studies analysis of potential spillover effect from marine protected areas, using food web models                                         | 2014 |   | * |   | * |   | * | * |  |
| 27951642 | Collier (2011)                         | The rapid rise of streams and rivers in conservation assessment                                                                                                             | 2011 |   | * | * | * |   | * | * |  |
| 28366742 | Collins (1991)                         | The Conservation Atlas of Tropical Forests: Asia                                                                                                                            | 1991 |   | * |   | * |   | * | * |  |
| 27939208 | Colquhoun (2015)                       | Community-managed conservation efforts at Tsingy Mahaloka/KOFAMA, northern Madagascar: right place at the wrong time?                                                       | 2015 |   | * |   | * |   | * | * |  |
| 27931634 | Colwell (1997)                         | Russian nature reserves and conservation of biological diversity                                                                                                            | 1997 | * |   |   |   |   |   |   |  |
| 33026214 | Conservancy (2001)                     | Spring Creek Rivers Conservation Plan                                                                                                                                       | 2001 |   | * |   | * |   | * | * |  |
| 27969839 | Conservation (2008)                    | Modeling Economic Trade-offs and Ecological Processes in Landscape-scale Conservation planning: Workshop Report & Actions (Cebu, Philippines: January 9-13, 2008)           | 2008 | * |   |   |   |   |   |   |  |
| 33026271 | Conservation Action... (Gomes)         | Conservation Action Plan for the Iberian Lynx in Portugal                                                                                                                   |      |   | * |   | * |   | * | * |  |
| 33026240 | Conservation Area Networks... (Sarkar) | Conservation Area Networks for the Indian Region: Systematic Methods and Future Prospects                                                                                   | 2007 |   | * |   | * | * | * | * |  |
| 27955265 | Conservation assessment... (Moore)     | Conservation assessment of the Chatham Island Oystercatcher <i>Haematopus chathamensis</i>                                                                                  | 2014 |   | * |   | * |   | * | * |  |
| 27955170 | Conservation Planning ...              | Conservation Planning, End-Use Analysis, and the Impacts on Maximum-Day Demand                                                                                              |      | * |   |   |   |   |   |   |  |
| 27955169 | Conservation Planning ...              | Conservation Planning in the Deschutes River Basin, Oregon                                                                                                                  |      | * |   |   |   |   |   |   |  |
| 27955197 | Conservation Planning ... (Chaplin)    | Conservation Planning Within the Great Plains                                                                                                                               | 1995 | * |   |   |   |   |   |   |  |
| 27955227 | Conservation Planning ... (Gregg)      | Conservation Planning Strategies                                                                                                                                            | 2005 | * |   |   |   |   |   |   |  |

|          |                                      |                                                                                                                                                                  |      |   |   |  |   |   |   |   |  |   |
|----------|--------------------------------------|------------------------------------------------------------------------------------------------------------------------------------------------------------------|------|---|---|--|---|---|---|---|--|---|
| 27955255 | Conservation Planning ... (Marsh)    | Conservation Planning under the Endangered Species Act: A New Paradigm for Conserving Biological Diversity                                                       | 1994 | * |   |  |   |   |   |   |  |   |
| 27955266 | Conservation Planning ... (Morlan)   | Conservation Planning and Accomplishments in the Pacific Northwest                                                                                               | 1993 | * |   |  |   |   |   |   |  |   |
| 27955294 | Conservation planning ... (Rawat)    | Conservation planning and management of protected areas in the Himalaya                                                                                          | 1996 | * |   |  |   |   |   |   |  |   |
| 27955218 | Conservation Planning .... (Freeman) | Conservation Planning: a Contrary Process                                                                                                                        | 2002 | * |   |  |   |   |   |   |  |   |
| 33026215 | Conte (2006)                         | Conservation Plan: Station 43 Sanctuary Important Bird Area                                                                                                      | 2006 |   | * |  | * |   | * | * |  |   |
| 27929157 | Corace (2012)                        | An Ecoregional Context for Forest Management on National Wildlife Refuges of the Upper Midwest, USA                                                              | 2012 |   |   |  | * |   | * |   |  |   |
| 27929551 | Corbalan (2011)                      | Lizards as conservation targets in Argentinean Patagonia                                                                                                         | 2011 |   | * |  | * | * | * | * |  |   |
| 27938462 | Cornelius (2001)                     | Effects of human activity on the structure of coastal marine bird assemblages in Central Chile                                                                   | 2001 |   |   |  | * |   | * |   |  |   |
| 28366753 | Corrigan (2008)                      | Working Toward High Seas Marine Protected Areas: An Assessment of Progress Made and Recommendations for Collaboration                                            | 2008 |   | * |  | * | * | * | * |  |   |
| 27938260 | Cowie-Haskell (2003)                 | Integrating science into the design of the Tortugas Ecological Reserve                                                                                           | 2003 |   | * |  | * |   | * | * |  |   |
| 27951257 | Cowling (1999)                       | Planning for persistence--systematic reserve design in southern Africa's Succulent Karoo desert                                                                  | 1999 |   | * |  | * |   | * | * |  |   |
| 27951353 | Cowling (2003)                       | A conservation assessment for the Subtropical Thicket Biome                                                                                                      | 2003 | * |   |  |   |   |   |   |  |   |
| 27931168 | Cowling (2003)                       | Introduction to systematic conservation planning in the Cape Floristic Region                                                                                    | 2003 |   |   |  |   |   |   |   |  | * |
| 27931172 | Cowling (2003)                       | The expert or the algorithm? - comparison of priority conservation areas in the Cape Floristic Region identified by park managers and reserve selection software | 2003 |   | * |  | * | * | * | * |  |   |
| 27938625 | Cox (1999)                           | Wings Across the Border                                                                                                                                          | 1999 | * |   |  |   |   |   |   |  |   |
| 27929189 | Craig (2012)                         | OCEAN GOVERNANCE FOR THE 21ST CENTURY: MAKING MARINE ZONING CLIMATE CHANGE ADAPTABLE                                                                             | 2012 |   | * |  | * |   | * | * |  |   |
| 27994140 | Crist (2014)                         | Tools for Landscape-Level Assessment and Planning: A Guide for the North Pacific Landscape Conservation Cooperative                                              | 2014 |   | * |  | * |   | * | * |  |   |
| 33026314 | Crossman (2007)                      | Systematic landscape restoration in the rural-urban fringe: Meeting conservation planning and policy goals                                                       | 2007 |   | * |  | * | * | * | * |  |   |
| 27926905 | Cruz (2015)                          | Reef quality criteria for marine reserve selection: an example from eastern Brazil                                                                               | 2015 |   | * |  | * |   | * | * |  |   |

|          |                       |                                                                                                                                                                   |      |   |   |  |   |   |   |   |  |
|----------|-----------------------|-------------------------------------------------------------------------------------------------------------------------------------------------------------------|------|---|---|--|---|---|---|---|--|
| 27930076 | Currie (2009)         | Evaluating the effects of reserve closure on algae, invertebrate and fish assemblages at a temperate South Australian marine reserve                              | 2009 |   |   |  | * |   | * |   |  |
| 27935983 | D'Agnes (2010)        | Integrated management of coastal resources and human health yields added value: A comparative study in Palawan (Philippines)                                      | 2010 |   |   |  | * |   | * |   |  |
| 27969808 | Daley (2015)          | Can marine reserves conserve vulnerable sharks in the deep-sea? A case study of <i>Centrophorus zeehaani</i> , (Centrophoridae) examined with acoustic telemetry. | 2015 |   | * |  | * |   | * | * |  |
| 27937761 | Dalle (2006)          | Integrating analyses of local land-use regulations, cultural perceptions and land-use/land cover data for assessing the success of community-based conservation   | 2006 |   | * |  | * |   | * | * |  |
| 27938370 | Dallmeier (2002)      | Planning an adaptive management process for biodiversity conservation and resource development in the Camisea River Basin                                         | 2002 |   | * |  | * |   | * | * |  |
| 27952004 | Damen (1983)          | Land ecology and land evaluation Tajo-Tietar area, province of Caceres, Spain: a base for land use and nature conservation planning                               | 1983 | * |   |  |   |   |   |   |  |
| 27951878 | Daoust (2010)         | Institutional arrangements governing marine conservation planning in the Canadian Arctic: the case of Nunavut, Canada                                             | 2010 |   | * |  | * |   | * | * |  |
| 33026289 | Darr (1998)           | Land-use planning to conserve habitat for area-sensitive forest birds                                                                                             | 1998 |   | * |  | * |   | * | * |  |
| 27937615 | Das (2006)            | Prioritisation of conservation areas in the Western Ghats, India                                                                                                  | 2006 |   | * |  | * | * | * | * |  |
| 27929405 | Dauwalter (2011)      | Identification and Implementation of Native Fish Conservation Areas in the Upper Colorado River Basin                                                             | 2011 |   | * |  | * |   | * | * |  |
| 27954447 | Davie (2014)          | Herders and Wolves in Post-Soviet Society: An Ethnographic Study in Mongolia's Ikh Nart Nature Reserve                                                            | 2014 |   | * |  | * |   | * | * |  |
| 27930916 | Davies (2005)         | The re-expansion and improving status of the silver-spotted skipper butterfly ( <i>Hesperia comma</i> ) in Britain: a metapopulation success story                | 2005 |   | * |  | * |   | * | * |  |
| 27936659 | Davies-Mostert (2009) | A Critical Assessment of South Africa's Managed Metapopulation Recovery Strategy for African Wild Dogs                                                            | 2009 |   |   |  | * |   | * | * |  |
| 33026315 | Davis (2004)          | A Framework for Setting Land Conservation Priorities in the Sierra Nevada 1                                                                                       | 2004 |   | * |  | * |   | * | * |  |
| 27930856 | Davis (2005)          | Science and society: Marine reserve design for the California Channel Islands                                                                                     | 2005 |   | * |  | * |   | * | * |  |
| 27930757 | Davis (2006)          | Efficient conservation in a utility-maximization framework                                                                                                        | 2006 |   | * |  | * | * | * | * |  |
| 27932972 | Davis (2016)          | Status and trends of northern spotted owl habitats                                                                                                                | 2016 |   |   |  | * |   | * |   |  |
| 27936887 | Day (2008)            | The need and practice of monitoring, evaluating and adapting marine planning and management-lessons from the Great Barrier Reef                                   | 2008 |   | * |  |   |   |   | * |  |
| 27933443 | De Alban (2015)       | High conservation value areas as a strategic approach for protected area management in the Philippines                                                            | 2015 |   | * |  | * |   | * | * |  |



|          |                                         |                                                                                                                                                           |      |   |   |   |   |   |   |   |  |
|----------|-----------------------------------------|-----------------------------------------------------------------------------------------------------------------------------------------------------------|------|---|---|---|---|---|---|---|--|
| 27932320 | de Andrade (2017)                       | Offshore marine protected areas: Divergent perceptions of divers and artisanal fishers                                                                    | 2017 |   | * |   | * |   | * | * |  |
| 27934752 | De Angelo (2013)                        | Understanding species persistence for defining conservation actions: A management landscape for jaguars in the Atlantic Forest                            | 2013 |   | * |   | * | * | * | * |  |
| 27937480 | De Grassi (2007)                        | Integrated landscape management methodology: An application of Bayesian Belief Networks (BBNs) to the UNESCO landscape of the Diamantina (Ferrara, Italy) | 2007 |   | * |   | * |   | * | * |  |
| 27929314 | de la Montana (2011)                    | Conservation planning of vertebrate diversity in a Mediterranean agricultural-dominant landscape                                                          | 2011 |   | * |   | * | * | * | * |  |
| 27954511 | De Lopez (2001)                         | Brave new parks: lessons from internationally funded protected areas in Cambodia                                                                          | 2001 | * |   |   |   |   |   |   |  |
| 27926719 | de Rezende (2015)                       | Atlantic Forest spontaneous regeneration at landscape scale                                                                                               | 2015 |   | * |   | * |   | * | * |  |
| 27933121 | Degteva (2015)                          | Striking the balance: Challenges and perspectives for the protected areas network in northeastern European Russia                                         | 2015 |   | * |   | * |   | * | * |  |
| 33026288 | Del Campo (2007)                        | Applying asset mapping to protected area planning and management in the Cordillera Azul National Park, Peru                                               | 2007 |   | * |   | * |   | * | * |  |
| 27952035 | Deliverable 3.6 Zoning... (Vanaverbeke) | Deliverable 3.6 Zoning plan of case studies: Evaluation of spatial management options for the case studies ANNEX                                          |      |   | * |   |   |   |   | * |  |
| 27928511 | Delsink (2013)                          | Biologically relevant scales in large mammal management policies                                                                                          | 2013 |   |   |   | * |   | * | * |  |
| 27935363 | Demirbaş (2012)                         | Are the protected areas of Turkey protected from landscape fragmentation?                                                                                 | 2012 | * |   |   |   |   |   |   |  |
| 33026287 | Department (2005)                       | Systematic conservation planning for the forest biome of South Africa                                                                                     | 2005 |   | * |   |   |   | * | * |  |
| 27951779 | Derry (1997)                            | No Surprises after Winstar: Contractual Certainty and Habitat Conservation Planning under the Endangered Species Act                                      | 1997 |   | * | * | * |   | * | * |  |
| 27951264 | DeVELICE (1988)                         | Gradient analysis in nature reserve design: a New Zealand example                                                                                         | 1988 |   | * |   | * |   | * | * |  |
| 27955299 | Developing a conservation... (Sambas)   | Developing a conservation plan for wetlands in Saudi Arabia: the NCWCD system plan for protected areas                                                    | 1993 | * |   |   |   |   |   |   |  |
| 27955239 | Developing a Species... (Kennedy)       | Developing a Species at Risk Conservation Plan: The Thicksilver Pipeline Experience                                                                       | 2002 | * |   |   |   |   |   |   |  |
| 33026298 | Developing an Integrated... (d...)      | Developing an Integrated Protected Area System for the Cardamom Mountains                                                                                 | 2007 |   | * |   | * |   | * | * |  |
| 27955268 | Development of a Spatial... (Murphy)    | Development and Assessment of a Spatial Decision Support System for Conservation Planning                                                                 | 2003 |   |   |   | * | * | * | * |  |

|          |                                       |                                                                                                                                                 |      |   |   |  |   |   |   |   |  |
|----------|---------------------------------------|-------------------------------------------------------------------------------------------------------------------------------------------------|------|---|---|--|---|---|---|---|--|
| 27955311 | Development of a Wetland... (Smith)   | Development of a Wetland Conservation Plan for Mission/Aransas Watershed Area: Overview of the Process                                          | 2000 |   | * |  | * |   | * | * |  |
| 27955234 | Development of Illinois'... (Hubbell) | Development of Illinois' Second Wetland Conservation Plan                                                                                       | 1993 | * |   |  |   |   |   |   |  |
| 27926746 | Devillers (2015)                      | Reinventing residual reserves in the sea: are we favouring ease of establishment over need for protection?                                      | 2015 |   | * |  | * | * | * | * |  |
| 33026295 | Diamond (2005)                        | Influence of targets and assessment region size on perceived conservation priorities                                                            | 2005 |   | * |  | * |   | * | * |  |
| 27962545 | Diaw (2003)                           | Assessing long-term management options for the villages in the Korup National Park: an evaluation of all options                                | 2003 |   | * |  | * |   | * | * |  |
| 27936774 | Diemont (2009)                        | Lacandon Maya ecosystem management: Sustainable design for subsistence and environmental restoration                                            | 2009 |   | * |  | * |   | * | * |  |
| 27932315 | Dilkina (2017)                        | Trade-offs and efficiencies in optimal budget-constrained multispecies corridor networks                                                        | 2017 |   | * |  | * | * | * | * |  |
| 27938082 | Dimitrakopoulos (2004)                | Questioning the effectiveness of the Natura 2000 Special Areas of Conservation strategy: The case of Crete                                      | 2004 |   | * |  | * |   | * | * |  |
| 27940281 | Ding (2008)                           | An overview of spatial management and marine protected areas in the East China Sea.                                                             | 2008 |   | * |  | * |   | * | * |  |
| 27930586 | Diniz (2007)                          | Conservation biogeography of anurans in Brazilian Cerrado                                                                                       | 2007 |   | * |  | * | * | * | * |  |
| 27931799 | Diniz (2017)                          | Last of the green: identifying priority sites to prevent plant extinctions in Brazil                                                            | 2017 |   | * |  | * |   | * | * |  |
| 33026209 | Division (2004)                       | Bhutan biological conservation complex (Living in harmony with the Nature)                                                                      | 2004 |   | * |  | * |   | * | * |  |
| 27954497 | Dixon (2008)                          | Balancing Environment and Development: Costs, Revenues, and Benefits of the Western Riverside County Multiple Species Habitat Conservation Plan | 2008 |   | * |  | * |   | * | * |  |
| 27937328 | Dobbs (2007)                          | Incorporating marine turtle habitats into the marine protected area design for the Great Barrier Reef Marine Park, Queensland, Australia        | 2007 |   | * |  |   |   |   | * |  |
| 27937802 | Donahue (2005)                        | The endangered species act and its current set of incentive tools for species protection                                                        | 2005 |   | * |  | * |   | * | * |  |
| 27931583 | Done (1998)                           | Integrated coastal zone and fisheries ecosystem management: Generic goals and performance indices                                               | 1998 |   | * |  | * |   | * | * |  |
| 33026293 | Doran (2007)                          | Matrix Forest Blocks in Michigan's Northern Lower Peninsula: Identification and Strategy Development                                            | 2007 |   | * |  | * | * | * | * |  |
| 27926926 | Dorning (2015)                        | Simulating urbanization scenarios reveals tradeoffs between conservation planning strategies                                                    | 2015 |   | * |  | * |   | * | * |  |
| 27969885 | Douglas (2011)                        | The effect of carbon credits on savanna land management and priorities for biodiversity conservation                                            | 2011 |   | * |  | * | * | * | * |  |

|          |                                  |                                                                                                                                                                                                             |      |   |   |   |   |   |   |   |  |
|----------|----------------------------------|-------------------------------------------------------------------------------------------------------------------------------------------------------------------------------------------------------------|------|---|---|---|---|---|---|---|--|
| 27937513 | Douvere (2007)                   | The role of marine spatial planning in sea use management: The Belgian case                                                                                                                                 | 2007 |   | * |   | * |   | * | * |  |
| 27930186 | Douvere (2009)                   | New perspectives on sea use management: Initial findings from European experience with marine spatial planning                                                                                              | 2009 | * |   |   |   |   |   |   |  |
| 27927464 | Downs (2014)                     | Strategically Locating Wildlife Crossing Structures for Florida Panthers Using Maximal Covering Approaches                                                                                                  | 2014 |   | * |   | * |   | * | * |  |
| 27935875 | Drechsler (2011)                 | Trade-offs in the design of cost-effective habitat networks when conservation costs are variable in space and time                                                                                          | 2011 |   | * |   | * |   | * | * |  |
| 27935424 | Drew (2011)                      | Expert knowledge as a basis for landscape ecological predictive models                                                                                                                                      | 2011 |   | * | * | * |   | * | * |  |
| 27929740 | du (2010)                        | Considerations of scale in biodiversity conservation                                                                                                                                                        | 2010 |   | * |   | * |   | * | * |  |
| 27934155 | Duarte (2014)                    | Conservation network design for endemic cacti under taxonomic uncertainty                                                                                                                                   | 2014 |   | * |   | * | * | * | * |  |
| 27951558 | Dubois (2011)                    | Integrating climate change vulnerability assessments into adaptation planning: A case study using the NatureServe Climate Change Vulnerability Index to inform conservation planning for species in Florida | 2011 |   | * |   | * |   | * | * |  |
| 27932107 | Dunn (2016)                      | Optimising different types of biodiversity coverage of protected areas with a case study using Himalayan Galliformes                                                                                        | 2016 |   | * |   | * | * | * | * |  |
| 27932141 | Duran (2016)                     | Species richness representation within protected areas is associated with multiple interacting spatial features                                                                                             | 2016 |   | * |   | * |   | * | * |  |
| 27951978 | DuVarney (1999)                  | Field Level Evaluation of a Prototype Multiple Objective Decision Support System for Conservation Planning, Natural Resources Conservation Service Report                                                   | 1999 | * |   |   |   |   |   |   |  |
| 27932087 | Dwyer (2016)                     | Power pole density informs spatial prioritization for mitigating avian electrocution                                                                                                                        | 2016 |   | * |   | * |   | * | * |  |
| 27955250 | Dynamic Integrated Protection... | Dynamic Integrated Protection and Development of Historic Area: A Case Study of Jinggang Mountain Conservation Planning                                                                                     | 2013 | * |   |   |   |   |   |   |  |
| 27929516 | Dzialak (2011)                   | Prioritizing Conservation of Ungulate Calving Resources in Multiple-Use Landscapes                                                                                                                          | 2011 |   |   |   | * |   | * |   |  |
| 33026330 | Eastern Cape Biodiversity...     | Eastern Cape Biodiversity Conservation Plan Handbook                                                                                                                                                        |      |   | * |   | * |   | * | * |  |
| 33026319 | Ecological (2008)                | The Continuum Project: Establishing Ecological Networks Throughout the European Alps                                                                                                                        | 2008 |   | * |   | * |   | * | * |  |
| 33026210 | Ecoregional conservation...      | Ecoregional conservation plan for the Caucasus                                                                                                                                                              | 2005 |   | * |   | * |   | * | * |  |
| 27936886 | Edgar (2008)                     | Key biodiversity areas as globally significant target sites for the conservation of marine biological diversity                                                                                             | 2008 |   | * |   | * | * | * | * |  |

|          |                                           |                                                                                                                                                                                              |      |   |   |   |   |   |   |   |  |
|----------|-------------------------------------------|----------------------------------------------------------------------------------------------------------------------------------------------------------------------------------------------|------|---|---|---|---|---|---|---|--|
| 27936410 | Edgar (2009)                              | Exploited reefs protected from fishing transform over decades into conservation features otherwise absent from seascapes                                                                     | 2009 |   |   |   | * |   | * |   |  |
| 27935506 | Edwards (2011)                            | Lessons from the application of decision-support tools in participatory management of the New Forest National Park, UK                                                                       | 2011 |   | * |   | * |   | * | * |  |
| 27929412 | Egoh (2011)                               | Identifying priority areas for ecosystem service management in South African grasslands                                                                                                      | 2011 |   | * |   | * | * | * | * |  |
| 27936463 | Eisma-Osorio (2009)                       | Scaling up local government initiatives toward ecosystem-based fisheries management in Southeast Cebu Island, Philippines                                                                    | 2009 |   |   |   | * |   | * | * |  |
| 27931007 | Eken (2004)                               | Key biodiversity areas as site conservation targets                                                                                                                                          | 2004 |   | * |   | * |   | * | * |  |
| 27932638 | Eken (2016)                               | Identifying key biodiversity areas in Turkey: a multi-taxon approach                                                                                                                         | 2016 |   | * |   | * |   | * | * |  |
| 27931869 | Eklund (2016)                             | Contrasting spatial and temporal trends of protected area effectiveness in mitigating deforestation in Madagascar                                                                            | 2016 |   |   |   | * |   | * |   |  |
| 27932782 | El-Gabbas (2016)                          | Conserving Egypt's reptiles under climate change                                                                                                                                             | 2016 |   | * |   | * |   | * | * |  |
| 27936837 | Ellis (2008)                              | Is community-based forest management more effective than protected areas? A comparison of land use/land cover change in two neighboring study areas of the Central Yucatan Peninsula, Mexico | 2008 |   |   |   | * |   | * |   |  |
| 27929471 | Ellis (2011)                              | An assessment of coastal land-use and land-cover change from 1974-2008 in the vicinity of Mobile Bay, Alabama                                                                                | 2011 |   | * |   | * |   | * | * |  |
| 27951846 | Ellis-Joseph (1992)                       | Global Waterfowl: Conservation Assessment & Management Plan                                                                                                                                  | 1992 |   |   | * |   |   |   |   |  |
| 27936314 | Embling (2010)                            | Using habitat models to identify suitable sites for marine protected areas for harbour porpoises ( <i>Phocoena phocoena</i> )                                                                | 2010 |   | * |   | * | * | * | * |  |
| 27931354 | Emmingham (2002)                          | Development of ecosystem management in the Pacific Northwest                                                                                                                                 | 2002 |   | * |   | * |   | * | * |  |
| 27955332 | Endangered Species Habitat... (Van Buren) | Endangered Species Habitat Conservation Planning and Spatial Decision Support Systems: The Case of the Cedar River Watershed                                                                 | 2000 | * |   |   |   |   |   |   |  |
| 33026303 | ENGAGING LOCAL COMMUNITIES.. (Hoang)      | Engaging local communities in protected area development, functioning and management: A case study of Hoang Lien Project – Fauna and Flora International, Vietnam Programme                  |      |   | * |   | * |   | * | * |  |
| 27928560 | Eno (2013)                                | Assessing the sensitivity of habitats to fishing: from seabed maps to sensitivity maps                                                                                                       | 2013 |   | * |   | * |   | * | * |  |
| 33026340 | Environmental (2005)                      | Colorado Sagebrush: A Conservation Assessment and Strategy                                                                                                                                   | 2005 |   | * |   | * |   | * | * |  |
| 27938197 | Epifanio (2003)                           | Integrating conservation genetic considerations into conservation planning: A case study of bull trout in the Lake Pend Oreille - Lower Clark Fork River system                              | 2003 |   | * |   | * |   | * | * |  |
| 27930818 | Ericson (2015)                            | A participatory approach to conservation in the Calakmul Biosphere Reserve, Campeche, Mexico                                                                                                 | 2015 |   |   |   | * |   | * |   |  |

|          |                   |                                                                                                                                                                              |      |   |   |   |   |   |   |   |  |
|----------|-------------------|------------------------------------------------------------------------------------------------------------------------------------------------------------------------------|------|---|---|---|---|---|---|---|--|
| 27954429 | Ernoul (2015)     | Trends in management plans and guides: 25 years of experience from Southern France                                                                                           | 2015 |   | * |   | * |   | * | * |  |
| 33026300 | Ervin (2003)      | Protected Area Assessments in Perspective                                                                                                                                    | 2003 |   | * |   | * |   | * | * |  |
| 27926681 | Esparrago (2015)  | Traditional grassland management and surrounding land use drive the abundance of a prairie plant species in urban areas                                                      | 2015 |   | * |   | * |   | * | * |  |
| 27928880 | Esselman (2013)   | Riverine connectivity, upstream influences, and multi-taxa representation in a conservation area network for the fishes of Michigan, USA                                     | 2013 |   | * |   | * | * | * | * |  |
| 27930243 | Evans (2008)      | Obstacles to Bottom-Up Implementation of Marine Ecosystem Management                                                                                                         | 2008 |   | * |   | * | * | * | * |  |
| 27934223 | Evans (2014)      | Assessing multiregion avian benefits from strategically targeted agricultural buffers                                                                                        | 2014 |   |   |   | * |   | * |   |  |
| 27926650 | Evans (2015)      | Clear consideration of costs, condition and conservation benefits yields better planning outcomes                                                                            | 2015 |   | * |   | * | * | * | * |  |
| 27951679 | Fagerström (2003) | A participatory approach for integrated conservation planning in a small catchment in Loess Plateau, China: Part II. Analysis and findings                                   | 2003 |   | * |   | * |   | * | * |  |
| 27937520 | Fahd (2007)       | The effect of the sampling scale on zooplankton community assessment and its implications for the conservation of temporary ponds in south-west Spain                        | 2007 |   | * |   | * |   | * | * |  |
| 27954524 | Fairbanks (1994)  | Room to roam: why the San Diego region is considered a national model for habitat conservation                                                                               | 1994 | * |   |   |   |   |   |   |  |
| 27969775 | Faith (2001)      | A biodiversity conservation plan for Papua New Guinea based on biodiversity trade-offs analysis                                                                              | 2001 |   | * |   | * | * | * | * |  |
| 27938510 | Faith (2001)      | Some future prospects for systematic biodiversity planning in Papua New Guinea - and for biodiversity planning in general                                                    | 2001 |   | * |   | * | * | * | * |  |
| 27951899 | Faith (2005)      | How large-scale DNA barcoding programs can boost biodiversity conservation planning: linking phylogenetic diversity (PD) analyses to the Barcode of Life Database (BoLD)     | 2005 | * |   |   |   |   |   |   |  |
| 27969857 | Faith (2006)      | Research needs and challenges for the 'systematic conservation planning' approach to the 2010 biodiversity target                                                            | 2006 | * |   |   |   |   |   |   |  |
| 27969772 | Faith (2010)      | False economy?                                                                                                                                                               | 2010 |   | * | * | * |   | * | * |  |
| 27933647 | Fajardo (2014)    | Combined use of systematic conservation planning, species distribution modelling, and connectivity analysis reveals severe conservation gaps in a megadiverse country (Peru) | 2014 |   | * |   | * | * | * | * |  |
| 27935619 | Fan (2011)        | An analysis on spatio-temporal dynamics of suitable habitats for waterbirds based on spatial zonation at Chongming Dongtan, Shanghai                                         | 2011 | * |   |   |   |   |   |   |  |
| 27928518 | Fan (2013)        | Vegetation Restoration and Conservation Plans for Integrated Coastal Management in Hengqin, China                                                                            | 2013 | * |   |   |   |   |   |   |  |

|          |                  |                                                                                                                                                               |      |   |   |  |   |   |   |   |  |
|----------|------------------|---------------------------------------------------------------------------------------------------------------------------------------------------------------|------|---|---|--|---|---|---|---|--|
| 27932162 | Fan (2016)       | Optimal conservation planning of multiple hydrological ecosystem services under land use and climate changes in Teshio river watershed, northernmost of Japan | 2016 |   | * |  | * | * | * | * |  |
| 27932833 | Fariña (2016)    | Bottom-up and top-down human impacts interact to affect a protected coastal Chilean marsh                                                                     | 2016 |   | * |  | * |   | * | * |  |
| 27927357 | Farwig (2014)    | Linking Land-Use Scenarios, Remote Sensing and Monitoring to Project Impact of Management Decisions                                                           | 2014 |   | * |  | * |   | * | * |  |
| 27929883 | Faude (2010)     | ESTIMATING THE IMPACT OF FOREST USE ON BIODIVERSITY IN PROTECTED AREAS OF DEVELOPING TROPICAL REGIONS                                                         | 2010 |   | * |  | * |   | * | * |  |
| 27931447 | Feldman (2000)   | Sage scrub revolution? Property rights, political fragmentation, and conservation planning in Southern California under the federal Endangered Species Act    | 2000 |   | * |  | * |   | * | * |  |
| 27951712 | Fellows (2001)   | Central Plains/Playa Lakes regional shorebird conservation plan                                                                                               | 2001 |   | * |  | * |   | * | * |  |
| 27951837 | Fengquan (2005)  | Exploration of Bio-diversity Conservation Planning in Construction of Ecological Landscape                                                                    | 2005 | * |   |  |   |   |   |   |  |
| 27929313 | Fensham (2011)   | Four desert waters: Setting arid zone wetland conservation priorities through understanding patterns of endemism                                              | 2011 |   | * |  | * |   | * | * |  |
| 27936219 | Ferketic (2010)  | Conservation justice in metropolitan Cape Town: A study at the Macassar Dunes Conservation Area                                                               | 2010 |   | * |  | * |   | * | * |  |
| 27930855 | Fernandes (2005) | Establishing representative no-take areas in the Great Barrier Reef: Large-scale implementation of theory on marine protected areas                           | 2005 |   |   |  |   |   |   | * |  |
| 27926765 | Fernandes (2015) | Strategies for conservation planning and management of terrestrial ecosystems in small islands (exemplified for the Macaronesian islands)                     | 2015 |   | * |  | * | * | * | * |  |
| 27931780 | Fernandes (2015) | Using modeling tools for implementing feasible land use and nature conservation governance systems in small islands The Pico Island (Azores) case-study       | 2015 |   | * |  | * | * | * | * |  |
| 27931943 | Fernandez (2016) | A spatial multicriteria decision analysis for selecting priority sites for plant species restoration: a case study from the Chilean biodiversity hotspot      | 2016 |   | * |  | * | * | * | * |  |
| 27939205 | Ferrarini (2015) | Integrating landscape changes into ecological connectivity: What-if flow connectivity.                                                                        | 2015 |   | * |  | * |   | * | * |  |
| 27936631 | Ferreira (2009)  | Community perceptions of four protected areas in the Northern portion of the Cerrado hotspot, Brazil                                                          | 2009 |   |   |  | * |   | * |   |  |
| 27952066 | Few (1998)       | Community participation in conservation planning in the coastal zone of Belize                                                                                | 1998 |   |   |  | * |   | * |   |  |
| 27938563 | Few (2000)       | Conservation, participation, and power: Protected-area planning in the coastal zone of Belize                                                                 | 2000 |   | * |  | * |   | * | * |  |
| 27951160 | Few (2001)       | Containment and counter-containment: planner/community relations in conservation planning                                                                     | 2001 |   | * |  | * |   | * | * |  |

|          |                      |                                                                                                                                                       |      |   |   |   |   |   |   |   |  |
|----------|----------------------|-------------------------------------------------------------------------------------------------------------------------------------------------------|------|---|---|---|---|---|---|---|--|
| 27951094 | Fischer (2010)       | Reviewing the quality of strategic environmental assessment reports for English spatial plan core strategies                                          | 2010 |   | * | * | * |   | * | * |  |
| 33026276 | Fish (2000)          | The Jordan River Natural Conservation Corridor Report                                                                                                 | 2000 |   | * |   | * |   | * | * |  |
| 27928689 | Fishburn (2013)      | Changing spatial patterns of conservation investment by a major land trust                                                                            | 2013 |   |   |   | * |   | * |   |  |
| 27936796 | Fitzsimons (2008)    | Ecosystem conservation in multi-tenure reserve networks: The contribution of land outside of publicly protected areas                                 | 2008 |   |   |   | * |   | * |   |  |
| 27937043 | Fitzsimons (2008)    | Evolving governance arrangements in multi-tenure reserve networks                                                                                     | 2008 |   | * |   | * |   | * | * |  |
| 27929144 | Fleming (2012)       | Challenges to achieving greater and fairer stakeholder involvement in marine spatial planning as illustrated by the Lyme Bay scallop dredging closure | 2012 |   |   |   | * |   | * |   |  |
| 27939086 | Flensted (2016)      | Red-listed species and forest continuity - a multi-taxon approach to conservation in temperate forests.                                               | 2016 |   | * |   | * |   | * | * |  |
| 33026290 | For (2008)           | Large scale conservation planning and priorities for the Kavango-Zambezi Transfrontier Conservation Area                                              | 2008 |   | * |   | * | * | * | * |  |
| 27951523 | Foreman (2000)       | The elements of a wildlands network conservation plan: An example from the Sky Islands                                                                | 2000 | * |   |   |   |   |   |   |  |
| 27929663 | Forero-Medina (2012) | Representation of Global and National Conservation Priorities by Colombia's Protected Area Network                                                    | 2012 |   | * |   | * | * | * | * |  |
| 33026257 | Forrest (2004)       | Ocean of grass: A conservation assessment for the Northern Great Plains                                                                               | 2004 |   | * |   | * |   | * | * |  |
| 27932152 | Foster (2016)        | Planning for metapopulation persistence using a multiple-component, cross-scale model of connectivity                                                 | 2016 |   | * |   | * |   | * | * |  |
| 27939321 | Fourie (2015)        | Landscape connectivity of the grassland biome in Mpumalanga, South Africa                                                                             | 2015 |   | * |   | * |   | * | * |  |
| 27934708 | Fox (2013)           | Addressing policy issues in a stakeholder-based and science-driven marine protected area network planning process                                     | 2013 |   | * |   | * | * | * | * |  |
| 27938310 | Francis (2002)       | Marine protected areas in the Eastern African Region: How successful are they?                                                                        | 2002 |   | * |   | * |   | * | * |  |
| 27931397 | Francour (2001)      | A review of marine protected areas in the northwestern Mediterranean region: siting, usage, zonation and management                                   | 2001 |   | * |   | * |   | * | * |  |
| 27937929 | Fraschetti (2005)    | Conservation of Mediterranean seascapes: Analyses of existing protection schemes                                                                      | 2005 |   |   |   | * |   | * |   |  |
| 27935004 | Fraschetti (2012)    | Idiosyncratic effects of protection in a remote marine reserve                                                                                        | 2012 |   |   |   | * |   | * |   |  |
| 27954444 | Frazao (2014)        | How sustainable is sustainable marine spatial planning? Part II - The Portuguese experience                                                           | 2014 |   | * | * | * |   | * | * |  |
| 27928971 | Freeman (2012)       | Trajectories of spiny lobster <i>Jasus edwardsii</i> recovery in New Zealand marine reserves: is settlement a driver?                                 | 2012 |   |   |   | * |   | * |   |  |
| 27934631 | Freudenberger (2013) | Nature conservation: Priority-setting needs a global change                                                                                           | 2013 |   | * | * | * |   | * | * |  |

|          |                                  |                                                                                                                                          |      |   |   |  |   |   |   |   |  |
|----------|----------------------------------|------------------------------------------------------------------------------------------------------------------------------------------|------|---|---|--|---|---|---|---|--|
| 27930317 | Frid (2008)                      | Incorporating ecological functioning into the designation and management of marine protected areas                                       | 2008 |   | * |  | * |   | * | * |  |
| 27934751 | Frid (2013)                      | Using State-and-transition modeling to account for imperfect detection in invasive species management                                    | 2013 |   | * |  | * |   | * | * |  |
| 27938157 | Friedlander (2003)               | Designing Effective Marine Protected Areas in Seaflower Biosphere Reserve, Colombia, Based on Biological and Sociological Information    | 2003 |   | * |  | * | * | * | * |  |
| 27937497 | Friedlander (2007)               | Coupling ecology and GIS to evaluate efficacy of marine protected areas in Hawaii                                                        | 2007 |   |   |  | * |   | * |   |  |
| 27955339 | From Conservation Plan... (West) | From Conservation Plan to Management Plan                                                                                                | 1999 | * |   |  |   |   |   |   |  |
| 27937949 | Fuber (2005)                     | 'Suitability in size' for bird protection areas - Evaluation method for area selection according to the Birds Directive                  | 2005 | * |   |  |   |   |   |   |  |
| 27931829 | Fuentes (2016)                   | Conservation hotspots for marine turtle nesting in the United States based on coastal development                                        | 2016 |   | * |  | * |   | * | * |  |
| 27938575 | Fuentes-Quezada (2000)           | Nesting biodiversity conservation into landscape management                                                                              | 2000 |   | * |  | * |   | * | * |  |
| 27931161 | Fuller (2003)                    | What does IUCN species action planning contribute to the conservation process?                                                           | 2003 |   |   |  | * |   | * | * |  |
| 27936129 | Fuller (2010)                    | Replacing underperforming protected areas achieves better conservation outcomes                                                          | 2010 |   | * |  | * |   | * | * |  |
| 27931828 | Fullerton (2016)                 | Setting spatial conservation priorities despite incomplete data for characterizing metapopulations                                       | 2016 |   | * |  | * |   | * | * |  |
| 27971077 | Funch (2009)                     | Mapping and evaluation of the state of conservation of the vegetation in and surrounding the Chapada Diamantina National Park, NE Brazil | 2009 |   | * |  | * |   | * | * |  |
| 27931514 | Funk (1999)                      | Testing the use of specimen collection data and GIS in biodiversity exploration and conservation decision making in Guyana               | 1999 |   | * |  | * |   | * | * |  |
| 27951656 | Gaffin (1997)                    | Can We Conserve California's Threatened Fisheries through Natural Community Conservation Planning                                        | 1997 |   | * |  | * |   | * | * |  |
| 27970026 | Gafta (2006)                     | Nature conservation: concepts and practice                                                                                               | 2006 | * |   |  |   |   |   |   |  |
| 27926925 | Gagne (2015)                     | A simple landscape design framework for biodiversity conservation                                                                        | 2015 |   | * |  | * | * | * | * |  |
| 27939991 | Gaines (2010)                    | Evolving science of marine reserves: new developments and emerging research frontiers.                                                   | 2010 |   | * |  | * |   | * | * |  |
| 27930219 | Game (2008)                      | Should We Protect the Strong or the Weak? Risk, Resilience, and the Selection of Marine Protected Areas                                  | 2008 |   | * |  | * | * | * | * |  |
| 27951142 | Game (2011)                      | Informed opportunism for conservation planning in the Solomon Islands                                                                    | 2011 |   | * |  |   |   |   | * |  |
| 27934544 | Ganem (2013)                     | Conservation policies and control of habitat fragmentation in the Brazilian cerrado biome                                                | 2013 |   | * |  | * |   | * | * |  |



|          |                    |                                                                                                                                                                                                                |      |   |   |   |   |   |   |   |  |  |
|----------|--------------------|----------------------------------------------------------------------------------------------------------------------------------------------------------------------------------------------------------------|------|---|---|---|---|---|---|---|--|--|
| 27929760 | Gao (2010)         | Network Environ Analysis of Spatial Arrangement for Reserves in Wuyishan Nature Reserve, China                                                                                                                 | 2010 | * |   |   |   |   |   |   |  |  |
| 27934346 | Gao (2013)         | Identifying functionally connected habitat compartments with a novel regionalization technique                                                                                                                 | 2013 |   | * |   | * |   | * | * |  |  |
| 33026346 | Gap (2007)         | Identifying Mexico's terrestrial priority sites: an analysis of key targets and major threats                                                                                                                  | 2007 |   | * |   | * | * | * | * |  |  |
| 27934464 | Garces (2013)      | Evaluating the management effectiveness of three marine protected areas in the Calamianes Islands, Palawan Province, Philippines: Process, selected results and their implications for planning and management | 2013 |   |   |   | * |   | * |   |  |  |
| 27927150 | Garcia (2014)      | Movement patterns of fish in a Martinique MPA: implications for marine reserve design                                                                                                                          | 2014 |   | * |   | * |   | * | * |  |  |
| 27929667 | Gardner (2010)     | A multi-region assessment of tropical forest biodiversity in a human-modified world                                                                                                                            | 2010 |   | * | * | * |   | * | * |  |  |
| 27931989 | Gardner (2016)     | The impact of natural resource use on bird and reptile communities within multiple-use protected areas: evidence from sub-arid Southern Madagascar                                                             | 2016 |   |   |   | * |   | * |   |  |  |
| 27969785 | Garono (2002)      | Adult Insect Assemblages as a Conservation Planning Tool                                                                                                                                                       | 2002 | * |   |   |   |   |   |   |  |  |
| 27927039 | Garrett (2015)     | Guadalupe Bass Restoration Initiative                                                                                                                                                                          | 2015 |   | * |   | * |   | * | * |  |  |
| 27940290 | Gascon (2007)      | Amphibian Conservation Action Plan. Proceedings IUCN/SSC Amphibian Conservation Summit 2005.                                                                                                                   | 2007 |   | * |   | * |   | * | * |  |  |
| 27952068 | Gaspar (2007)      | Arthropod diversity and conservation planning in native forests ...                                                                                                                                            | 2007 | * |   |   |   |   |   |   |  |  |
| 27930728 | Gaston (2006)      | The ecological effectiveness of protected areas: The United Kingdom                                                                                                                                            | 2006 |   | * |   | * |   | * | * |  |  |
| 27936965 | Gaston (2008)      | Protected areas in Europe: Principle and practice                                                                                                                                                              | 2008 |   | * |   |   |   | * | * |  |  |
| 27934768 | Geng (2013)        | Biodiversity impact assessment of mineral resources exploitation and conservation planning in Ganzi Prefecture of Sichuan Province, Southwest China                                                            | 2013 | * |   |   |   |   |   |   |  |  |
| 33026317 | Geoghegan (1998)   | Financing protected area management: Experiences from the Caribbean                                                                                                                                            | 1998 |   | * |   | * |   | * | * |  |  |
| 27932249 | George (2016)      | Marine Spatial Planning: What Does It Have to Offer Malaysia?                                                                                                                                                  | 2016 | * |   |   |   |   |   |   |  |  |
| 27931020 | Gerber (2004)      | The use of demographic sensitivity analysis in marine species conservation planning                                                                                                                            | 2004 |   | * |   | * |   | * | * |  |  |
| 27929445 | Gerrodette (2011)  | Estimating the success of protected areas for the vaquita, <i>Phocoena sinus</i>                                                                                                                               | 2011 |   |   |   | * |   | * |   |  |  |
| 27930054 | Geselbracht (2009) | Identification of a spatially efficient portfolio of priority conservation sites in marine and estuarine areas of Florida                                                                                      | 2009 |   | * |   | * | * | * | * |  |  |
| 27951981 | Ghormley (2010)    | Final Supplement to the Forest Plan Biological Evaluation and Conservation Assessment for Rocky Mountain Bighorn Sheep                                                                                         | 2010 | * |   |   |   |   |   |   |  |  |
| 27969819 | Gibson (2015)      | Compositional patterns in terrestrial fauna and wetland flora and fauna across the Pilbara biogeographic region of Western Australia and the representativeness of its conservation reserve system             | 2015 |   | * |   | * |   | * | * |  |  |

|          |                                       |                                                                                                                                                                                                |      |   |   |   |   |   |   |   |  |
|----------|---------------------------------------|------------------------------------------------------------------------------------------------------------------------------------------------------------------------------------------------|------|---|---|---|---|---|---|---|--|
| 27932389 | Giehl (2017)                          | Scientific evidence and potential barriers in the management of Brazilian protected areas                                                                                                      | 2017 |   | * |   | * |   | * | * |  |
| 27939994 | Gilligan (2010)                       | The distribution and abundance of two endangered fish species in the NSW Upper Murray Catchment.                                                                                               | 2010 |   | * |   | * |   | * | * |  |
| 27929585 | Gimmi (2011)                          | Increasing development in the surroundings of U S National Park Service holdings jeopardizes park effectiveness                                                                                | 2011 |   |   |   | * |   | * |   |  |
| 27927203 | Giorgi (2014)                         | Spatial conservation planning framework for assessing conservation opportunities in the Atlantic Forest of Brazil                                                                              | 2014 |   | * |   | * | * | * | * |  |
| 27955187 | GIS as a Decision - Making.. (Barnes) | GIS as a Decision-Making Tool in the Ecosystem Conservation Planning Process                                                                                                                   | 1998 | * |   |   |   |   |   |   |  |
| 27951240 | Gitay (1991)                          | Species-area relations in a New Zealand tussock grassland, with implications for nature reserve design and for community structure                                                             | 1991 |   | * | * | * |   | * | * |  |
| 27938028 | Githiru (2004)                        | Using scientific evidence to guide the conservation of a highly fragmented and threatened Afrotropical forest                                                                                  | 2004 |   | * |   | * |   | * | * |  |
| 27951421 | Githiru (2007)                        | Application of fragmentation research to conservation planning for multiple stakeholders: An example from the Taita Hills, southeast Kenya                                                     | 2007 |   | * |   | * |   | * | * |  |
| 27929305 | Githiru (2011)                        | Using science to guide conservation: From landscape modelling to increased connectivity in the Taita Hills, SE Kenya                                                                           | 2011 |   | * |   | * |   | * | * |  |
| 27935768 | Gleason (2011)                        | USDA conservation program and practice effects on wetland ecosystem services in the Prairie Pothole Region                                                                                     | 2011 |   | * |   | * |   | * | * |  |
| 27934712 | Gleason (2013)                        | Designing a network of marine protected areas in California: Achievements, costs, lessons learned, and challenges ahead                                                                        | 2013 |   | * |   | * | * | * | * |  |
| 27926800 | Glegg (1930)                          | Marine governance in the English Channel (La Manche): Linking science and management                                                                                                           | 1930 |   | * |   | * | * | * | * |  |
| 27929901 | Glennon (2010)                        | A General Model for Site-Based Conservation in Human-Dominated Landscapes: The Landscape Species Approach                                                                                      | 2010 | * |   |   |   |   |   |   |  |
| 27927380 | Goble (2014)                          | Coastal management in South Africa: Historical perspectives and setting the stage of a new era                                                                                                 | 2014 |   | * |   | * |   | * | * |  |
| 27927535 | Godoy-Burki (2014)                    | Conservation priorities in the Southern Central Andes: mismatch between endemism and diversity hotspots in the regional flora                                                                  | 2014 |   | * |   | * | * | * | * |  |
| 27951927 | Goldstein (2004)                      | War between social worlds : scientific deadlock during preparation of an endangered species Habitat Conservation Plan (HCP) and the co-production of scientific knowledge and the social order | 2004 |   | * |   | * |   | * | * |  |
| 27929638 | Gomez-Rodriguez (2010)                | Relative importance of dynamic and static environmental variables as predictors of amphibian diversity patterns                                                                                | 2010 |   | * |   | * |   | * | * |  |

|          |                        |                                                                                                                                                                                                                                                                                   |      |   |   |  |   |   |   |   |  |
|----------|------------------------|-----------------------------------------------------------------------------------------------------------------------------------------------------------------------------------------------------------------------------------------------------------------------------------|------|---|---|--|---|---|---|---|--|
| 33026263 | Gonsalves (2014)       | Ecoregion-based conservation assessments of the Southwestern United States and Northwestern Mexico: A Geodatabase for Six Ecoregions, Including the Apache Highlands, Arizona-New Mexico Mountains, Colorado Plateau, Mojave Desert, Sonoran Desert, and Southern Rocky Mountains | 2006 |   | * |  |   |   | * | * |  |
| 27932570 | González (2016)        | Ownership property size, landscape structure, and spatial relationships in the Edwards Plateau of Texas (USA): landscape scale habitat management implications                                                                                                                    | 2016 |   |   |  | * |   | * |   |  |
| 27926854 | Gonzalez-Maya (2013)   | Effectiveness of Protected Areas for Representing Species and Populations of Terrestrial Mammals in Costa Rica                                                                                                                                                                    | 2013 |   | * |  | * |   | * | * |  |
| 27938189 | Goodman (2003)         | Assessing management effectiveness and setting priorities in protected areas in KwaZulu-Natal                                                                                                                                                                                     | 2003 |   |   |  | * |   | * | * |  |
| 27938819 | Gordon (1997)          | Conservation under the Endangered Species Act                                                                                                                                                                                                                                     | 1997 |   | * |  | * |   | * | * |  |
| 27935418 | Gordon (2011)          | Simulating the value of collaboration in multi-actor conservation planning                                                                                                                                                                                                        | 2011 |   | * |  | * | * | * | * |  |
| 27926608 | Gormley (2001)         | Connectivity and Dispersal Patterns of Protected Biogenic Reefs: Implications for the Conservation of Modiolus modiolus (L.) in the Irish Sea                                                                                                                                     | 2015 |   | * |  | * |   | * | * |  |
| 27927243 | Goswami (2014)         | The importance of conflict-induced mortality for conservation planning in areas of human-elephant co-occurrence                                                                                                                                                                   | 2014 |   | * |  | * |   | * | * |  |
| 27936552 | Graham (2009)          | Characterization of the goliath grouper <i>Epinephelus itajara</i> fishery of southern Belize for conservation planning                                                                                                                                                           | 2009 |   | * |  | * |   | * | * |  |
| 27969872 | Grantham (2007)        | Systematic conservation planning for pelagic ecosystems                                                                                                                                                                                                                           | 2007 | * |   |  |   |   |   |   |  |
| 27935822 | Grantham (2011)        | Accommodating dynamic oceanographic processes and pelagic biodiversity in marine conservation planning                                                                                                                                                                            | 2011 |   | * |  | * | * | * | * |  |
| 27929993 | Green (2009)           | Designing a resilient network of marine protected areas for Kimbe Bay, Papua New Guinea                                                                                                                                                                                           | 2009 |   | * |  |   |   |   | * |  |
| 27929038 | Green (2012)           | Estimating management costs of protected areas: A novel approach from the Eastern Arc Mountains, Tanzania                                                                                                                                                                         | 2012 |   | * |  | * |   | * | * |  |
| 27951506 | Greer (2004)           | Habitat conservation planning in San Diego County, California: Lessons learned after five years of implementation                                                                                                                                                                 | 2004 |   | * |  | * |   | * | * |  |
| 27934071 | Gregory (2014)         | Response variables for evaluation of the effectiveness of conservation corridors                                                                                                                                                                                                  | 2014 |   | * |  | * |   | * | * |  |
| 27931135 | Grill (2003)           | Diversity patterns in butterfly communities of the Greek nature reserve Dadia                                                                                                                                                                                                     | 2003 |   | * |  | * |   | * | * |  |
| 27930174 | Grober-Dunsmore (2009) | A Landscape Ecology Approach for the Study of Ecological Connectivity Across Tropical Marine Seascapes                                                                                                                                                                            | 2009 | * |   |  |   |   |   |   |  |
| 27932220 | Ground (2016)          | The value of urban and peri-urban conservation efforts within a global biodiversity hotspot                                                                                                                                                                                       | 2016 |   | * |  | * |   | * | * |  |
| 27951775 | Group (1999)           | Landbird conservation plan for Alaska biogeographic regions, version 1.0                                                                                                                                                                                                          | 1999 |   | * |  | * |   | * | * |  |

|          |                                  |                                                                                                                                                |      |   |   |   |   |   |   |   |  |  |
|----------|----------------------------------|------------------------------------------------------------------------------------------------------------------------------------------------|------|---|---|---|---|---|---|---|--|--|
| 27951695 | Group (2000)                     | A conservation plan for Alaska shorebirds                                                                                                      | 2000 | * |   |   |   |   |   |   |  |  |
| 27928659 | Groves (2013)                    | Planning Tool to Support Planning the Future of Coastal Louisiana                                                                              | 2013 | * |   |   |   |   |   |   |  |  |
| 27934906 | Gruber (2012)                    | Mind the gap!" - How well does Natura 2000 cover species of European interest?                                                                 | 2012 |   | * |   | * |   | * | * |  |  |
| 27936805 | Grujić (2008)                    | Conflict management in protected areas: The Lazar Canyon natural monument, Eastern Serbia                                                      | 2008 |   | * |   | * |   | * | * |  |  |
| 27932126 | Gubbi (2016)                     | Providing more protected space for tigers Panthera tigris: a landscape conservation approach in the Western Ghats, southern India              | 2016 |   | * |   | * |   | * | * |  |  |
| 27939020 | Gubbins (1983)                   | A nature conservation strategy for the United Kingdom: an independent view.                                                                    | 1983 | * |   |   |   |   |   |   |  |  |
| 27926998 | Guilhau mon (2015)               | Representing taxonomic, phylogenetic and functional diversity: new challenges for Mediterranean marine-protected areas                         | 2015 |   | * |   | * |   | * | * |  |  |
| 27933995 | Gurney (2014)                    | Poverty and protected areas: An evaluation of a marine integrated conservation and development project in Indonesia                            | 2014 |   |   |   | * |   | * |   |  |  |
| 27926675 | Gurney (2015)                    | Efficient and equitable design of marine protected areas in Fiji through inclusion of stakeholder-specific objectives in conservation planning | 2015 |   | * |   | * | * | * | * |  |  |
| 27935964 | Gurrutxa ga (2010)               | GIS-based approach for incorporating the connectivity of ecological networks into regional planning                                            | 2010 |   | * |   | * | * | * | * |  |  |
| 27939619 | Gurrutxa ga (2012)               | Network of ecological corridors of the Basque County: 7 years of integration in regional planning.                                             | 2012 | * |   |   |   |   |   |   |  |  |
| 27929611 | Gustafsson (2010)                | Biodiversity Conservation in Swedish Forests: Ways Forward for a 30-Year-Old Multi-Scaled Approach                                             | 2010 |   | * |   | * |   | * | * |  |  |
| 27938121 | Gutiérrez (2004)                 | Habitat-based conservation priorities for carabid beetles within the Picos de Europa National Park, northern Spain                             | 2004 |   | * |   | * |   | * | * |  |  |
| 27951926 | Gutzwiller (2002)                | Using broad-scale ecological information in conservation planning: introduction to section IV                                                  | 2002 |   |   | * |   |   |   |   |  |  |
| 27951977 | Guzman-Aranda (2004)             | Evaluation of conservation planning in Mexico: A stakeholder analysis approach                                                                 | 2004 |   |   |   | * |   | * | * |  |  |
| 27955326 | Habitat Conservation... (Thomas) | Habitat Conservation Planning: Certainly Empowered, Somewhat Deliberative, Questionably Democratic                                             | 2001 |   | * | * | * |   | * | * |  |  |
| 27931633 | Hafner (1997)                    | Long-term monitoring and conservation of herons in France and Italy                                                                            | 1997 |   | * |   | * |   | * | * |  |  |
| 33026306 | Hagerman (2010)                  | Expert views on biodiversity conservation in an era of climate change                                                                          | 2010 |   | * | * | * |   | * | * |  |  |
| 27934203 | Hall (2014)                      | Ecological and Social Outcomes of a New Protected Area in Tanzania                                                                             | 2014 |   |   |   | * |   | * |   |  |  |
| 27931217 | Halpern (2003)                   | The impact of marine reserves: Do reserves work and does reserve size matter?                                                                  | 2003 |   |   |   | * |   | * |   |  |  |
| 27928808 | Hamel (2013)                     | Compromises between international habitat conservation guidelines and small-scale fisheries in Pacific island countries                        | 2013 |   | * |   | * | * | * | * |  |  |

|          |                                             |                                                                                                                                                                              |      |   |   |   |   |   |   |   |  |
|----------|---------------------------------------------|------------------------------------------------------------------------------------------------------------------------------------------------------------------------------|------|---|---|---|---|---|---|---|--|
| 27938529 | Hamilton (2000)                             | Conservation in a region of political instability: Bwindi impenetrable forest, Uganda                                                                                        | 2000 |   | * |   | * |   | * | * |  |
| 27935819 | Handke (2011)                               | Country-wide ecological network planning                                                                                                                                     | 2011 | * |   |   |   |   |   |   |  |
| 27930522 | Hanna (2007)                                | Integrated ecological and regional planning in a rapid-growth setting                                                                                                        | 2007 |   | * |   | * |   | * | * |  |
| 27933763 | Hannah (2012)                               | Cape floristic region, South Africa                                                                                                                                          | 2012 |   | * |   |   |   |   | * |  |
| 27938338 | Hannon (2002)                               | Corridors may not improve the conservation value of small reserves for most boreal birds                                                                                     | 2002 |   |   |   | * |   | * |   |  |
| 27929396 | Hansen (2011)                               | Hindsight in marine protected area selection: A comparison of ecological representation arising from opportunistic and systematic approaches                                 | 2011 |   | * |   | * |   | * |   |  |
| 27932343 | Hanson (2017)                               | Harbour seal ( <i>Phoca vitulina</i> ) abundance within the Firth of Tay and Eden Estuary, Scotland: recent trends and extrapolation to extinction                           | 2017 |   |   |   | * |   | * |   |  |
| 33026235 | Harvey (2003)                               | Conservation Assessment of Tejon Ranch                                                                                                                                       | 2003 |   | * |   | * | * | * | * |  |
| 27951256 | Hase (2003)                                 | A fine-scale conservation plan for Cape lowlands renosterveld: technical report                                                                                              | 2003 |   | * |   |   |   |   | * |  |
| 33026308 | Heart of the West Conservation... (Summary) | Heart of the West Conservation Plan                                                                                                                                          | 2004 |   | * |   |   |   | * | * |  |
| 27928884 | Heer (2013)                                 | Evidence-based assessment of butterfly habitat restoration to enhance management practices                                                                                   | 2013 |   | * |   | * |   | * | * |  |
| 27931638 | Heidt (1997)                                | Concept and requisites for nature conservation planning for an agricultural landscape in North-Eastern-Germany (Uckermark; Brandenburg)                                      | 1997 | * |   |   |   |   |   |   |  |
| 27952006 | Heilman (1998)                              | Nature reserve design in Southern New England: identification and evaluation of a De facto reserve system                                                                    | 1998 | * |   |   |   |   |   |   |  |
| 27937776 | Heinen (2006)                               | Evolving policies for conservation: An Historical Profile of the Protected Area System of Nepal                                                                              | 2006 |   | * |   | * |   | * | * |  |
| 27930414 | Helmer (2008)                               | Land cover and forest formation distributions for St. Kitts, Nevis, St. Eustatius, Grenada and Barbados from decision tree classification of cloud-cleared satellite imagery | 2008 |   | * |   | * |   | * | * |  |
| 27932033 | Henders on (2016)                           | Assessing the incidental value of a marine reserve to a lemon shark <i>Negaprion brevirostris</i> nursery                                                                    | 2016 |   |   |   | * |   | * |   |  |
| 33026302 | Henniker (2002)                             | Conservation, Preservation, and Open Space                                                                                                                                   | 2002 |   | * | * | * |   | * | * |  |
| 27951367 | Henson (2009)                               | The Heartland Conservation Process: enhancing biodiversity conservation and livelihoods through landscape-scale conservation planning in Africa                              | 2009 |   | * |   |   |   |   | * |  |
| 27936679 | Hepcan (2009)                               | Ecological networks as a new approach for nature conservation in Turkey: A case study of İzmir Province                                                                      | 2009 |   | * |   | * | * | * | * |  |
| 33026304 | Herdian a (2008)                            | Systematic Marine Conservation Planning: Towards a marine representative areas network in Naggroe Aceh Darussalam, Indonesia                                                 | 2008 |   | * |   | * | * | * | * |  |
| 27936558 | Herkert (2009)                              | Response of bird populations to farmland set-aside programs                                                                                                                  | 2009 |   |   |   | * |   | * |   |  |

|          |                          |                                                                                                                                                                                       |      |   |   |   |   |   |   |   |  |
|----------|--------------------------|---------------------------------------------------------------------------------------------------------------------------------------------------------------------------------------|------|---|---|---|---|---|---|---|--|
| 27927460 | Herman<br>n (2014)       | Assessment framework for<br>landscape services in European<br>cultural landscapes: An Austrian<br>Hungarian case study                                                                | 2014 |   | * |   | * |   | * | * |  |
| 27935858 | Hermos<br>o (2011)       | Addressing longitudinal<br>connectivity in the systematic<br>conservation planning of fresh<br>waters                                                                                 | 2011 |   | * |   | * | * | * | * |  |
| 27935011 | Hermos<br>o (2012)       | Using water residency time to<br>enhance spatio-temporal<br>connectivity for conservation<br>planning in seasonally dynamic<br>freshwater ecosystems                                  | 2012 |   | * |   | * | * | * | * |  |
| 27951300 | Hermos<br>o (2012)       | Integrating multidirectional<br>connectivity requirements in<br>systematic conservation planning<br>for freshwater systems                                                            | 2012 |   | * |   | * | * | * | * |  |
| 27926708 | Hermos<br>o (2015)       | Filling gaps in a large reserve<br>network to address freshwater<br>conservation needs                                                                                                | 2015 |   | * |   | * | * | * | * |  |
| 27935885 | Hertz<br>(2011)          | Planning for sustainable<br>agriculture, forestry, and<br>biodiversity in Maine                                                                                                       | 2011 | * |   |   |   |   |   |   |  |
| 27930808 | Hess<br>(2006)           | Comparing the potential<br>effectiveness of conservation<br>planning approaches in central<br>North Carolina, USA                                                                     | 2006 |   | * |   | * |   | * | * |  |
| 27931512 | Heydenr<br>ych<br>(1999) | Strategic conservation<br>interventions in a region of high<br>biodiversity and high vulnerability:<br>a case study from the Agulhas<br>Plain at the southern tip of Africa           | 1999 |   | * |   | * |   |   | * |  |
| 27929594 | Heyman<br>(2011)         | Elements for Building a<br>Participatory, Ecosystem-Based<br>Marine Reserve Network                                                                                                   | 2011 |   | * |   | * |   | * | * |  |
| 27935495 | Heyman<br>(2011)         | Focus: Marine geomorphology as a<br>determinant for essential life<br>habitat and marine protected area<br>design marine geomorphology in<br>the design of marine reserve<br>networks | 2011 |   | * | * | * |   | * | * |  |
| 27936470 | Hickie<br>(2009)         | Managing recreation, conservation<br>and economy: A critical appraisal<br>of the New South Wales Marine<br>Parks Amendment Act 2008                                                   | 2009 | * |   |   |   |   |   |   |  |
| 27938526 | Hicks<br>(2000)          | Practical tools to applying<br>landscape-scale assessments to<br>fragmented ownerships; Large<br>scale: Lessons learned from the<br>Plum Creek Timber Company<br>native fish HCP      | 2000 | * |   |   |   |   |   |   |  |
| 27931019 | Hitt<br>(2004)           | A case study of surrogate species<br>in aquatic conservation planning                                                                                                                 | 2004 |   | * |   | * |   | * | * |  |
| 27939946 | Hoagstr<br>om<br>(2011)  | A large-scale conservation<br>perspective considering endemic<br>fishes of the North American<br>plains.                                                                              | 2011 |   | * |   | * |   | * | * |  |
| 27951500 | Hocor<br>(2003)          | Regional landscape analysis and<br>reserve design to conserve<br>Florida's biodiversity                                                                                               | 2003 |   | * |   | * |   | * | * |  |
| 33026230 | Holmes<br>(2005)         | The Sagebrush Bird Conservation<br>Plan: A resource for protecting and<br>managing sagebrush habitats and<br>associated birds in California                                           | 2005 |   | * |   | * |   | * | * |  |
| 27929199 | Holmes<br>(2012)         | Can Cape Town's unique<br>biodiversity be saved? Balancing<br>conservation imperatives and<br>development needs                                                                       | 2012 |   | * |   | * |   | * | * |  |
| 27929536 | Holness<br>(2011)        | Towards a systematic conservation<br>plan for the Arabian Peninsula                                                                                                                   | 2011 |   | * |   | * | * | * | * |  |

|          |                        |                                                                                                                                                           |      |   |   |   |   |   |   |   |  |
|----------|------------------------|-----------------------------------------------------------------------------------------------------------------------------------------------------------|------|---|---|---|---|---|---|---|--|
| 27951172 | Hooker (2002)          | Ecosystem consideration in conservation planning: energy demand of foraging bottlenose whales ( <i>Hyperoodon ampullatus</i> ) in a marine protected area | 2002 |   | * |   | * |   | * | * |  |
| 27932215 | Hooker (2002)          | Effectiveness of Local Biodiversity Action Plans to Identify Locally Rare and Endangered Fish in Scotland                                                 | 2002 |   | * |   | * |   | * | * |  |
| 27938544 | Hopkins on (2000)      | National-scale conservation assessments at an appropriate resolution                                                                                      | 2000 |   |   |   | * |   | * |   |  |
| 27939827 | Horn (2011)            | Strategic conservation planning for terrestrial animal species in the Central Interior of British Columbia                                                | 2011 | * |   |   |   |   |   |   |  |
| 33026311 | Hortal (2006)          | Towards a synecological framework for systematic conservation planning                                                                                    | 2006 |   | * | * | * |   | * | * |  |
| 33026309 | Hossain (2009)         | Land Use Dynamics in a Marine Protected Area System in Lower Andaman Coast of Thailand, 1990–2005                                                         | 2009 |   | * |   | * |   | * | * |  |
| 27931111 | Houde (2004)           | Marine protected areas: An old tool for new circumstances                                                                                                 | 2004 | * |   |   |   |   |   |   |  |
| 27938792 | Howard (1997)          | Planning conservation areas in Uganda's natural forests                                                                                                   | 1997 |   | * |   | * | * | * | * |  |
| 27936103 | Howard-Williams (2010) | Thirty years of stream protection Long-term nutrient and vegetation changes in a retired pasture stream                                                   | 2010 |   | * |   | * |   | * | * |  |
| 27954515 | Hsu (1999)             | The potential and the pitfalls of habitat conservation planning under the Endangered Species Act                                                          | 1999 |   | * | * | * |   | * | * |  |
| 27927146 | Huang (2014)           | Applications of systematic approaches in freshwater conservation planning                                                                                 | 2014 |   | * |   | * | * | * | * |  |
| 27939279 | Huang (2014)           | Developing a cell-based spatial optimization model for land-use patterns planning.                                                                        | 2014 |   | * |   | * | * | * | * |  |
| 27933689 | Huang (2014)           | Multi-objective analysis of ecological landscape planning for agricultural environments – A case study for conserving birds in a highland farm            | 2014 | * |   |   |   |   |   |   |  |
| 27932966 | Huang (2016)           | Preliminary research on the zoning method of the marine ecological red line: A case study of hainan province                                              | 2016 | * |   |   |   |   |   |   |  |
| 27929918 | Huber (2010)           | Boundaries Make a Difference: The Effects of Spatial and Temporal Parameters on Conservation Planning*                                                    | 2010 |   |   |   | * |   | * |   |  |
| 27954419 | Huber (2016)           | Opponents, waverers or supporters: the influence of place-attachment dimensions on local residents' acceptance of a planned biosphere reserve in Austria  | 2016 |   | * |   | * |   | * | * |  |
| 27952081 | Huggins (2002)         | Designing marine protected area networks in the Dover Strait                                                                                              | 2002 | * |   |   |   |   |   |   |  |
| 27951474 | Huggins (2007)         | Biodiversity conservation assessment of the insular Caribbean using the Caribbean Decision Support System                                                 | 2007 |   | * |   | * | * | * | * |  |
| 27926713 | Huijbers (2015)        | Conservation Benefits of Marine Reserves are Undiminished Near Coastal Rivers and Cities                                                                  | 2015 |   |   | * | * |   | * |   |  |
| 27931553 | Hull (1998)            | Identification and evaluation of priority conservation areas for Buprestidae (Coleoptera) in South Africa, Lesotho, Swaziland and Namibia                 | 1998 |   | * |   | * | * | * | * |  |
| 27929245 | Hull (2011)            | Evaluating the efficacy of zoning designations for protected area management                                                                              | 2011 |   | * |   | * |   | * | * |  |

|          |                                    |                                                                                                                                                              |      |   |   |  |   |   |   |   |  |
|----------|------------------------------------|--------------------------------------------------------------------------------------------------------------------------------------------------------------|------|---|---|--|---|---|---|---|--|
| 27929707 | Huntington (2010)                  | Untangling Natural Seascape Variation from Marine Reserve Effects Using a Landscape Approach                                                                 | 2010 |   |   |  | * |   | * |   |  |
| 27929270 | Huntington (2011)                  | Corals fail to recover at a Caribbean marine reserve despite ten years of reserve designation                                                                | 2011 |   |   |  | * |   | * |   |  |
| 27935314 | Hurley (2012)                      | Untangling the landscape of deer overabundance: Reserve size versus landscape context in the agricultural Midwest                                            | 2012 |   | * |  | * |   | * | * |  |
| 27928574 | Huserbraten (2006)                 | Conservation, Spillover and Gene Flow within a Network of Northern European Marine Protected Areas                                                           | 2006 |   |   |  | * |   | * |   |  |
| 27939831 | Iachetti (2011)                    | Special issue: A conservation ecoregional assessment for the British Columbia Central Interior                                                               | 2011 | * |   |  |   |   |   |   |  |
| 27933775 | Iacona (2014)                      | Predicting the invadedness of protected areas                                                                                                                | 2014 |   |   |  | * |   | * | * |  |
| 27933203 | Ihlow (2015)                       | Habitat suitability, coverage by protected areas and population connectivity for the Siamese crocodile <i>Crocodylus siamensis</i> Schneider, 1801           | 2015 |   | * |  | * |   | * | * |  |
| 27936377 | Imam (2009)                        | Evaluation of suitable tiger habitat in Chandoli National Park, India, using spatial modelling of environmental variables                                    | 2009 |   | * |  | * |   | * | * |  |
| 27951457 | Impson (2002)                      | A conservation plan for the unique and highly threatened freshwater fishes of the Cape Floral Kingdom                                                        | 2002 |   | * |  | * |   | * | * |  |
| 27970902 | Infield (2001)                     | Community Attitudes and Behaviour Towards Conservation: An Assessment of a Community Conservation Programme Around Lake Mburo National Park, Uganda          | 2001 |   |   |  | * |   | * |   |  |
| 27994148 | Institute (2010)                   | An Ecological Approach to Integrating Conservation and Highway Planning Vol. 2                                                                               | 2010 |   | * |  | * | * | * | * |  |
| 27955252 | Introduction of a GIS... (Marciak) | Introduction of a GIS to a Rural Municipality for Conservation Planning                                                                                      | 1993 | * |   |  |   |   |   |   |  |
| 27955253 | Introduction of GIS... (Marciak)   | Introduction of GIS to a rural municipality through soil and water conservation planning                                                                     | 1993 | * |   |  |   |   |   |   |  |
| 27955292 | Involving Academics... (Price)     | Involving Academics in Endangered-Species Conservation: Lessons From the Stephens' Kangaroo Rat Habitat Conservation Plan                                    | 1993 | * |   |  |   |   |   |   |  |
| 27929642 | Iloja (2010)                       | The efficacy of Romania's protected areas network in conserving biodiversity                                                                                 | 2010 |   |   |  | * |   | * |   |  |
| 27940334 | Iriondo (2008)                     | Final considerations for the in situ conservation of plant genetic diversity.                                                                                | 2008 |   | * |  | * |   | * | * |  |
| 27955060 | IUCN (2000)                        | Conservation assessment & management plan (CAMP) for Arabian carnivores; Population and Habitat Viability Assessment (PHVA) for the Arabian leopard and tahr | 2000 |   | * |  | * |   | * | * |  |
| 33026249 | IUCN (2008)                        | Establishing Resilient Marine Protected Area Networks — Making It Happen                                                                                     | 2008 |   | * |  |   |   |   | * |  |
| 27931046 | Jackson (2004)                     | Size matters: the value of small populations for wintering waterbirds                                                                                        | 2004 |   |   |  | * |   | * |   |  |
| 27930337 | Jackson (2008)                     | Incorporating private lands in conservation planning: Protected areas in Britain                                                                             | 2008 |   | * |  | * |   | * | * |  |



|          |                            |                                                                                                                                                                                    |      |   |   |   |   |   |   |   |  |  |
|----------|----------------------------|------------------------------------------------------------------------------------------------------------------------------------------------------------------------------------|------|---|---|---|---|---|---|---|--|--|
| 27927004 | Jakiel (2015)              | Assessment of an Ecological Network at Local Scale in the Context of Landscape Changes: A Case Study from NE Poland                                                                | 2015 | * |   |   |   |   |   |   |  |  |
| 27952010 | Jamali (2012)              | Biological Soil Conservation Planning by Spatial Multi-Criteria Evaluation Techniques (Case Study: Bonkuh Watershed in Iran)                                                       | 2012 |   | * |   | * |   | * | * |  |  |
| 27951671 | James (1999)               | Lessons learned from a study of habitat conservation planning                                                                                                                      | 1999 |   | * |   | * |   | * | * |  |  |
| 27936742 | Janssen (2009)             | Sustainable development and protected landscapes: The case of the Netherlands                                                                                                      | 2009 |   | * |   | * |   | * |   |  |  |
| 27933307 | Janßen (2017)              | Integration of fisheries into marine spatial planning: Quo vadis?                                                                                                                  | 2017 |   | * |   | * |   | * | * |  |  |
| 27929896 | Jansujwi cz (2010)         | Protecting Natural Resources on Private Lands: The Role of Collaboration in Land-Use Planning                                                                                      | 2010 | * |   |   |   |   |   |   |  |  |
| 27969895 | Januchowski (2008)         | Towards a classification of streams for conservation planning in Queensland's wet tropics bioregion                                                                                | 2008 | * |   |   |   |   |   |   |  |  |
| 27969896 | Januchowski (2008)         | Towards stream classification for conservation planning : a wet tropics region case study                                                                                          | 2008 | * |   |   |   |   |   |   |  |  |
| 27929435 | Januchowski-Hartley (2011) | A systematic approach for prioritizing multiple management actions for invasive species                                                                                            | 2011 |   | * |   | * | * | * | * |  |  |
| 27951799 | Jasny (1997)               | Leap of faith: Southern California's experiment in natural community conservation planning                                                                                         | 1997 | * |   |   |   |   |   |   |  |  |
| 27940505 | Javier (2003)              | Do institutions affect the performance of marine protected areas? Evidences from the Philippines.                                                                                  | 2003 | * |   |   |   |   |   |   |  |  |
| 27934481 | Javier (2013)              | Developing a user-friendly decision support system for the wetlands corridor of the Gulf of California                                                                             | 2013 |   | * |   | * |   | * | * |  |  |
| 27938075 | Jax (2004)                 | Ecological theory and values in the determination of conservation goals: Examples from temperate regions of Germany, United States of America, and Chile                           | 2004 |   | * |   | * |   | * | * |  |  |
| 33026320 | Jennifer (1999)            | Policy Review Evaluating Integrated Resource Management                                                                                                                            | 1999 |   | * | * | * |   | * | * |  |  |
| 27929027 | Jennings (2012)            | Assessing fishery footprints and the trade-offs between landings value, habitat sensitivity, and fishing impacts to inform marine spatial planning and an ecosystem approach       | 2012 |   |   |   | * |   | * |   |  |  |
| 27938421 | Jepson (2002)              | A review of the efficacy of the protected area system of East Kalimantan Province, Indonesia                                                                                       | 2002 |   |   |   | * | * | * |   |  |  |
| 33026273 | Jepson (2002)              | Ecoregions in Context: a Critique with Special Reference to Indonesia                                                                                                              | 2002 |   | * | * | * |   | * | * |  |  |
| 27929538 | Jessen (2011)              | A Review of Canada's Implementation of the Oceans Act since 1997 From Leader to Follower?                                                                                          | 2011 |   | * |   | * |   | * | * |  |  |
| 27940177 | Jia (2009)                 | Primary study on urban biodiversity conservation planning.                                                                                                                         | 2009 | * |   |   |   |   |   |   |  |  |
| 27952011 | Jobin (2013)               | Evaluation of a Landscape Analysis Approach for Migratory Birds and Species at Risk Habitat Conservation Planning in the Mixedwood Plains Ecozone: Case Study in Lake Saint-Pierre | 2013 |   | * |   | * | * | * | * |  |  |
| 27939173 | Joffre (2015)              | Spatial planning for sustainable coastal shrimp production.                                                                                                                        | 2015 |   | * |   | * | * | * | * |  |  |
| 27937495 | Johannesen (2007)          | Protected areas, wildlife conservation, and local welfare                                                                                                                          | 2007 |   | * |   | * |   | * | * |  |  |

|          |                              |                                                                                                                                                                                                                                                                                                                              |      |   |   |   |   |   |   |   |  |
|----------|------------------------------|------------------------------------------------------------------------------------------------------------------------------------------------------------------------------------------------------------------------------------------------------------------------------------------------------------------------------|------|---|---|---|---|---|---|---|--|
| 27951875 | Johnson (1997)               | Conservation assessment and strategy for the jaguar in Arizona and New Mexico                                                                                                                                                                                                                                                | 1997 |   | * |   | * |   | * | * |  |
| 27932557 | Johnson (2016)               | The Pentland Firth and Orkney Waters and Scotland – Planning Europe's Atlantic gateway                                                                                                                                                                                                                                       | 2016 |   | * |   | * |   | * | * |  |
| 27933122 | Jones (2015)                 | Estimating the counterfactual impact of conservation programs on land cover outcomes: The role of matching and panel regression techniques                                                                                                                                                                                   | 2015 |   |   |   | * |   | * |   |  |
| 27935803 | Jongman (2011)               | The pan European ecological network: PEEN                                                                                                                                                                                                                                                                                    | 2011 |   | * |   | * |   | * | * |  |
| 27937595 | Jooß (2006)                  | Particular responsibility of local communities for the protection of Target Species in Baden-Wuerttemberg - Part 1: Approach to identify particular responsibilities of local communities for the protection of animal target species on a community level in the context of the 'Information System Target Species Concept' | 2006 | * |   |   |   |   |   |   |  |
| 27951718 | Jr (1998)                    | Seagrass conservation plan for Texas                                                                                                                                                                                                                                                                                         | 1998 |   | * |   | * |   | * | * |  |
| 27951915 | Jr (2004)                    | US Pacific Islands regional shorebird conservation plan                                                                                                                                                                                                                                                                      | 2004 |   | * |   | * |   | * | * |  |
| 28981789 | Juliani (2002)               | The Outer Islands bioregional program: integrated protected area management and spatial planning in Kalimantan and Papua                                                                                                                                                                                                     | 2002 |   | * |   | * | * | * | * |  |
| 27926596 | Junker (2015)                | Integrating wildlife conservation with conflicting economic land-use goals in a West African biodiversity hotspot                                                                                                                                                                                                            | 2015 |   | * |   | * | * | * | * |  |
| 27934352 | Jurkiewicz-Karnkowska (2013) | GIS analysis reveals the high diversity and conservation value of mollusc assemblages in the floodplain wetlands of the lower Bug River (East Poland)                                                                                                                                                                        | 2013 |   | * |   | * |   | * | * |  |
| 27936974 | Justus (2008)                | Influence of representation targets on the total area of conservation-area networks                                                                                                                                                                                                                                          | 2008 |   | * | * | * |   | * | * |  |
| 27931753 | JUVIK (1992)                 | ALTITUDINAL RESOURCE ZONATION VERSUS VERTICAL CONTROL - LAND-USE CONFLICT ON 2 HAWAIIAN MOUNTAINS                                                                                                                                                                                                                            | 1992 |   | * |   | * |   | * | * |  |
| 27937033 | Kadlec (2008)                | Revisiting urban refuges: Changes of butterfly and burnet fauna in Prague reserves over three decades                                                                                                                                                                                                                        | 2008 |   |   |   | * |   | * | * |  |
| 27930426 | Kallimanis (2008)            | Arable land and habitat diversity in Natura 2000 sites in Greece                                                                                                                                                                                                                                                             | 2008 |   |   |   | * |   | * |   |  |
| 27933045 | Kamp (2015)                  | Agricultural development and the conservation of avian biodiversity on the Eurasian steppes: A comparison of land-sparing and land-sharing approaches                                                                                                                                                                        | 2015 |   | * |   | * |   | * | * |  |
| 27928495 | Kareksela (2013)             | Use of Inverse Spatial Conservation Prioritization to Avoid Biological Diversity Loss Outside Protected Areas                                                                                                                                                                                                                | 2013 |   | * |   | * | * | * | * |  |
| 27926717 | Karimi (2015)                | Methods and participatory approaches for identifying social-ecological hotspots                                                                                                                                                                                                                                              | 2015 |   | * |   | * | * | * | * |  |
| 27930731 | Kati (2006)                  | Diversity, ecological structure, and conservation of the landbird community of Dadia reserve, Greece                                                                                                                                                                                                                         | 2006 |   | * |   | * |   | * | * |  |
| 27940803 | Kaul (1995)                  | The conservation of Indian freshwater resources.                                                                                                                                                                                                                                                                             | 1995 |   | * |   | * |   | * | * |  |

|          |                                        |                                                                                                                                                                     |      |   |   |   |   |   |   |   |   |
|----------|----------------------------------------|---------------------------------------------------------------------------------------------------------------------------------------------------------------------|------|---|---|---|---|---|---|---|---|
| 33026272 | Kazmier<br>ski<br>(2004)               | Conservation planning at the<br>landscape scale: A landscape<br>ecology method for regional land<br>trusts                                                          | 2004 |   | * |   | * |   | * | * |   |
| 27931173 | Kerley<br>(2003)                       | Options for the conservation of<br>large and medium-sized mammals<br>in the Cape Floristic Region<br>hotspot, South Africa                                          | 2003 |   | * |   | * | * | * | * |   |
| 27955194 | Kern<br>County<br>Habitat...<br>(Bopp) | Kern County Habitat Conservation<br>Plan                                                                                                                            | 1997 | * |   |   |   |   |   |   |   |
| 27935935 | Khan<br>(2010)                         | A methodology for the evaluation of<br>the biodiversity interest present in<br>three terrestrial ecosystems in the<br>Palma beach system                            | 2010 |   | * |   | * |   | * | * |   |
| 27936312 | Khan<br>(2010)                         | Protected areas: A resource or<br>constraint for local people?                                                                                                      | 2010 |   |   |   | * |   | * | * |   |
| 27935994 | Khatri<br>(2010)                       | Conservation governance in Nepal:<br>Protecting forest biodiversity and<br>people's livelihoods                                                                     | 2010 |   | * |   | * |   | * | * |   |
| 27951492 | Khoury<br>(2011)                       | A freshwater conservation<br>assessment of the Upper<br>Mississippi River basin using a<br>coarse-and fine-filter approach                                          | 2011 |   | * |   | * | * | * | * |   |
| 33026234 | Kilpatric<br>k (2004)                  | Southern Appalachian<br>conservation assessment:<br>Executive summary and regional<br>overview                                                                      | 2004 |   | * |   | * |   | * | * |   |
| 27930714 | King<br>(2006)                         | The role of the Wetland Reserve<br>Program in conservation efforts in<br>the Mississippi River Alluvial Valley                                                      | 2006 |   | * |   | * |   | * | * |   |
| 27954502 | King<br>(2007)                         | Conservation and community in the<br>new South Africa: a case study of<br>the Mahushe Shongwe Game<br>Reserve                                                       | 2007 |   |   |   | * |   | * | * |   |
| 27936337 | King<br>(2010)                         | Conservation Geographies in Sub-<br>Saharan Africa: The Politics of<br>National Parks, Community<br>Conservation and Peace Parks                                    | 2010 |   | * |   | * |   | * | * |   |
| 27937740 | Kingsfor<br>d (2006)                   | Urgent need for a systematic<br>expansion of freshwater protected<br>areas in Australia                                                                             | 2006 | * |   |   |   |   |   |   |   |
| 27934742 | Kirlin<br>(2013)                       | California's Marine Life Protection<br>Act Initiative: Supporting<br>implementation of legislation<br>establishing a statewide network of<br>marine protected areas | 2013 |   | * |   | * | * | * | * |   |
| 33026285 | Kittinger<br>(2009)                    | Reconciling Ecosystem-Based<br>Management and Focal Resource<br>Conservation in the<br>Papahānaumokuākea Marine<br>National Monument                                | 2010 |   | * | * | * |   | * | * |   |
| 27930332 | Klein<br>(2008)                        | Striking a balance between<br>biodiversity conservation and<br>socioeconomic viability in the<br>design of marine protected areas                                   | 2008 |   | * |   |   |   | * | * |   |
| 27929699 | Klein<br>(2010)                        | Spatial marine zoning for fisheries<br>and conservation                                                                                                             | 2009 |   | * |   | * | * | * | * |   |
| 27928579 | Klein<br>(2013)                        | Tradeoffs in marine reserve design:<br>habitat condition, representation,<br>and socioeconomic costs                                                                | 2013 |   | * |   | * | * | * | * |   |
| 27927461 | Klein<br>(2014)                        | Evaluating the influence of<br>candidate terrestrial protected<br>areas on coral reef condition in Fiji                                                             | 2014 |   | * |   |   |   |   | * |   |
| 27935541 | Klorvutti<br>montara<br>(2011)         | Evaluating the effectiveness of<br>protected areas for conserving<br>tropical forest butterflies of<br>Thailand                                                     | 2011 |   | * |   | * | * | * | * |   |
| 27930755 | Knight<br>(2006)                       | Designing systematic conservation<br>assessments that promote effective<br>implementation: Best practice from<br>South Africa                                       | 2006 |   |   |   |   |   |   |   | * |

|          |                 |                                                                                                                                          |      |   |   |   |   |   |   |   |  |
|----------|-----------------|------------------------------------------------------------------------------------------------------------------------------------------|------|---|---|---|---|---|---|---|--|
| 27936966 | Knight (2008)   | Knowing but not doing: Selecting priority conservation areas and the research-implementation gap                                         | 2008 |   | * |   | * |   | * | * |  |
| 27929673 | Knight (2010)   | Mapping Human and Social Dimensions of Conservation Opportunity for the Scheduling of Conservation Action on Private Land                | 2010 |   | * |   | * |   | * | * |  |
| 27929528 | Knight (2011)   | Walking in STEP: Lessons for linking spatial prioritisations to implementation strategies                                                | 2011 |   | * |   |   |   |   | * |  |
| 27929099 | Knip (2012)     | Evaluating marine protected areas for the conservation of tropical coastal sharks                                                        | 2012 |   |   |   | * |   | * |   |  |
| 27936670 | Ko (2009)       | Identifying biodiversity hotspots by predictive models: A case study using Taiwan's endemic bird species                                 | 2009 |   | * |   | * |   | * | * |  |
| 27931467 | Koch (2000)     | Conservation strategies for poorly surveyed taxa: a dung beetle (Coleoptera, Scarabaeidae) case study from southern Africa               | 2000 |   | * |   | * | * | * | * |  |
| 27935049 | Kohler (2012)   | Goodbye to islands - Hallo to connectivity for Alpine protected areas                                                                    | 2012 | * |   |   |   |   |   |   |  |
| 27929203 | Kopti (2012)    | Integration of fishery management into the process of Maritime Spatial Planning                                                          | 2012 |   | * |   | * | * | * | * |  |
| 27951870 | Kostyack (1997) | Habitat conservation planning: Time to give conservationists and other concerned citizens a seat at the table                            | 1997 |   | * |   | * |   | * | * |  |
| 27928656 | Kovacs (2011)   | Evaluating the Return in Ecosystem Services from Investment in Public Land Acquisitions                                                  | 2011 |   | * |   | * |   | * | * |  |
| 27951210 | Kramer (2002)   | Ecoregional conservation planning for the Mesoamerican Caribbean Reef                                                                    | 2002 |   | * |   |   |   | * | * |  |
| 27928618 | Kramer (2013)   | A Multi-objective, Return on Investment Analysis for Freshwater Conservation Planning                                                    | 2013 |   | * |   | * | * | * | * |  |
| 27926826 | Krenova (2015)  | Natura 2000-Solution for Eastern Europe or just a good start? The Sumava National Park as a test case                                    | 2015 |   | * |   | * |   | * | * |  |
| 27928705 | Kukkala (2013)  | Core concepts of spatial prioritisation in systematic conservation planning                                                              | 2013 |   | * | * |   |   | * | * |  |
| 27931898 | Kukkala (2016)  | Coverage of vertebrate species distributions by Important Bird and Biodiversity Areas and Special Protection Areas in the European Union | 2016 |   | * |   | * | * | * | * |  |
| 27932683 | Kukkala (2016)  | Matches and mismatches between national and EU-wide priorities: Examining the Natura 2000 network in vertebrate species conservation     | 2016 |   | * |   | * | * | * | * |  |
| 27929603 | Kuntner (2011)  | Phylogeny and conservation priorities of afrotherian mammals (Afrotheria, Mammalia)                                                      | 2011 |   | * | * | * |   | * | * |  |
| 27938504 | Kurttila (2001) | The spatial structure of forests in the optimization calculations of forest planning - A landscape ecological perspective                | 2001 |   | * | * | * |   | * | * |  |
| 27951025 | Kushlan (2002)  | Waterbird conservation for the Americas: the North American waterbird conservation plan, version 1                                       | 2002 |   | * |   | * |   | * | * |  |
| 27937075 | Kušová (2008)   | Biosphere reserves-An attempt to form sustainable landscapes. A case study of three biosphere reserves in the Czech Republic             | 2008 |   | * |   | * |   | * | * |  |

|          |                        |                                                                                                                                                                         |      |   |   |   |   |   |   |   |  |  |
|----------|------------------------|-------------------------------------------------------------------------------------------------------------------------------------------------------------------------|------|---|---|---|---|---|---|---|--|--|
| 27951894 | Kwon (2011)            | Integrated evaluation model of biodiversity for conservation planning: focused on Mt. Jiri, Mt. Deokyu and Mt. Gaya regions                                             | 2011 | * |   |   |   |   |   |   |  |  |
| 27938682 | Kyle (1999)            | Gillnetting in nature reserves: A case study from the Kosi Lakes, South Africa                                                                                          | 1999 |   |   |   | * |   | * |   |  |  |
| 27930032 | Lagabrie lle (2009)    | Identifying and mapping biodiversity processes for conservation planning in islands: A case study in Reunion Island (Western Indian Ocean)                              | 2009 |   | * |   | * | * | * | * |  |  |
| 27935704 | Lagabrie lle (2011)    | Integrating conservation, restoration and land-use planning in islands-An illustrative case study in Réunion Island (Western Indian Ocean)                              | 2011 |   | * |   | * | * | * | * |  |  |
| 33026284 | Lancot (2010)          | Landscapes of opportunity: A regional conservation plan for Wisconsin's Lake Michigan Basin                                                                             | 2003 |   | * |   | * | * | * | * |  |  |
| 27951946 | Larkham (1986)         | Conservation, Planning and Morphology in West Midlands Conservation Areas, 1968-84                                                                                      | 1986 | * |   |   |   |   |   |   |  |  |
| 27936994 | Larsen (2008)          | A quantitative analysis of biodiversity and the recreational value of potential national parks in Denmark                                                               | 2008 |   | * |   | * |   | * | * |  |  |
| 27929296 | Lau (2011)             | Effectiveness of a small marine reserve in southern China in protecting the harvested sea urchin <i>Anthodiaris crassispina</i> : A mark-and-recapture study            | 2011 |   |   |   | * |   | * |   |  |  |
| 27929799 | Laumoni er (2010)      | Eco-floristic sectors and deforestation threats in Sumatra: identifying new conservation area network priorities for ecosystem-based land use planning                  | 2010 |   |   |   | * |   | * |   |  |  |
| 27937797 | Lauranc e (2005)       | When bigger is better: The need for Amazonian mega-reserves                                                                                                             | 2005 |   | * |   | * |   | * | * |  |  |
| 27930686 | Laurel (2006)          | "Big" concerns with high latitude marine protected areas (MPAs): trends in connectivity and MPA size                                                                    | 2006 |   | * | * | * |   | * | * |  |  |
| 33026227 | Laymon (2004)          | The Riparian Bird Conservation Plan: A strategy for reversing the decline of riparian associated birds in California                                                    | 2004 |   | * |   | * |   | * | * |  |  |
| 27934869 | Le Saout (2013)        | Protected areas and effective biodiversity conservation                                                                                                                 | 2013 |   | * | * | * |   | * | * |  |  |
| 27938972 | Leader-Williams (1990) | Designing protected areas to conserve natural resources                                                                                                                 | 1990 | * |   |   |   |   |   |   |  |  |
| 33026278 | Leathwic k (2008)      | Novel methods for the design and evaluation of marine protected areas in offshore waters                                                                                | 2008 |   | * |   | * | * | * | * |  |  |
| 27927498 | Lederma n (2014)       | Habitat Conservation Plans Preserving Endangered Species and Delivering Transportation Projects                                                                         | 2014 |   |   |   | * |   | * |   |  |  |
| 27933933 | Lederma n (2014)       | Habitat conservation plans                                                                                                                                              | 2014 |   | * |   | * |   | * | * |  |  |
| 27954417 | Lederma n (2016)       | The Growing Role of Transportation Funding in Regional Habitat Conservation Planning                                                                                    | 2016 |   | * | * | * |   | * | * |  |  |
| 27936642 | Lee (2009)             | Determinants of local people's attitude toward conservation and the consequential effects on illegal resource harvesting in the protected areas of Sulawesi (Indonesia) | 2009 |   | * |   | * |   | * | * |  |  |

|          |                               |                                                                                                                                                                                 |      |   |   |  |   |   |   |   |   |
|----------|-------------------------------|---------------------------------------------------------------------------------------------------------------------------------------------------------------------------------|------|---|---|--|---|---|---|---|---|
| 27926904 | Lee (2015)                    | Size isn't everything: movements, home range, and habitat preferences of eastern blue groblers ( <i>Achoerodus viridis</i> ) demonstrate the efficacy of a small marine reserve | 2015 |   |   |  | * |   | * |   |   |
| 27935474 | Lefèvre (2011)                | Forest management and biodiversity - France at a crossroads                                                                                                                     | 2011 | * |   |  |   |   |   |   |   |
| 27939624 | Legge (2013)                  | From model outputs to conservation action: prioritizing locations for implementing agricultural best management practices in a Midwestern watershed.                            | 2013 |   | * |  | * | * | * | * |   |
| 27929959 | Lehtomäki (2010)              | Applying spatial conservation prioritization software and high-resolution GIS data to a national-scale study in forest conservation                                             | 2010 |   | * |  | * |   | * | * |   |
| 27937451 | Leibenath (2007)              | Local acceptance and transboundary connectivity of Natura 2000: Example of "unteres odertal" (Lower Oder Valley)                                                                | 2007 | * |   |  |   |   |   |   |   |
| 27970893 | Leisher (2012)                | Striking a Balance: Socioeconomic Development and Conservation in Grassland through Community-Based Zoning                                                                      | 2012 |   |   |  | * |   | * |   |   |
| 27951990 | Leonetti (2005)               | Watershed evaluation and identification of chinook salmon tier 1, 2, and 3 subbasins supporting salmon conservation planning in WRIA 8                                          | 2005 | * |   |  |   |   |   |   |   |
| 27930592 | Leroux (2007)                 | Potential spatial overlap of heritage sites and protected areas in a boreal region of northern Canada                                                                           | 2007 |   | * |  | * | * | * | * |   |
| 27934782 | Leroux (2013)                 | Land Development in and around Protected Areas at the Wilderness Frontier                                                                                                       | 2013 |   |   |  | * |   | * |   |   |
| 27926644 | Leroux (2015)                 | Legislative correlates of the size and number of protected areas in Canadian jurisdictions                                                                                      | 2015 |   |   |  | * |   | * |   |   |
| 27951041 | Leslie (2005)                 | A synthesis of marine conservation planning approaches                                                                                                                          | 2005 |   |   |  |   |   |   |   | * |
| 27936885 | Lester (2008)                 | Biological responses in marine no-take reserves versus partially protected areas                                                                                                | 2008 |   |   |  | * |   | * |   |   |
| 27932611 | Li (2016)                     | Remotely sensed data informs Red List evaluations and conservation priorities in Southeast Asia                                                                                 | 2016 |   | * |  | * |   | * | * |   |
| 27931852 | Liberati (2001)               | Beyond protection: Expanding "conservation opportunity" to redefine conservation planning in the 21st century                                                                   | 2001 |   | * |  | * | * | * | * |   |
| 27955233 | Liberia: A Post-War... (Hoyt) | Liberia: A Post-War Conservation Assessment                                                                                                                                     | 1997 | * |   |  |   |   |   |   |   |
| 27929798 | Linkie (2010)                 | Modelling the effectiveness of enforcement strategies for avoiding tropical deforestation in Kerinci Seblat National Park, Sumatra                                              | 2010 |   |   |  | * |   | * |   |   |
| 27951637 | Lipsett-Moore (2010)          | Ridges to reefs conservation plan for Choiseul Province, Solomon Islands                                                                                                        | 2010 |   | * |  |   |   |   | * |   |
| 27951867 | Lipsett-Moore (2010)          | Interim national terrestrial conservation assessment for Papua New Guinea: Protecting biodiversity in a changing climate                                                        | 2010 | * |   |  |   |   |   |   |   |
| 27926642 | Lira-Noriega (2015)           | Conservation planning for freshwater ecosystems in Mexico                                                                                                                       | 2015 |   | * |  | * | * | * | * |   |

|          |                       |                                                                                                                                                                                                                             |      |   |   |   |   |   |   |   |  |
|----------|-----------------------|-----------------------------------------------------------------------------------------------------------------------------------------------------------------------------------------------------------------------------|------|---|---|---|---|---|---|---|--|
| 27932283 | Lisón (2017)          | Conservation on the blink: Deficient technical reports threaten conservation in the Natura 2000 network                                                                                                                     | 2017 |   | * |   | * |   | * | * |  |
| 33026282 | Lockwood (1997)       | Integrated protected area selection in Australian biogeographic regions                                                                                                                                                     | 1997 |   | * | * | * |   | * | * |  |
| 27931276 | Loehle (2002)         | Forest management at landscape scales - Solving the problems                                                                                                                                                                | 2002 |   | * |   | * |   | * | * |  |
| 27929879 | Lombard (2010)        | Designing Conservation Corridors in Production Landscapes: Assessment Methods, Implementation Issues, and Lessons Learned                                                                                                   | 2010 |   | * |   | * | * | * | * |  |
| 27939825 | Loos (2011)           | Marxan analyses and prioritization of conservation areas for the Central Interior Ecoregional Assessment.                                                                                                                   | 2011 | * |   |   |   |   |   |   |  |
| 27932725 | López-Angarita (2016) | Mangroves and people: Lessons from a history of use and abuse in four Latin American countries                                                                                                                              | 2016 |   | * |   | * |   | * | * |  |
| 27937338 | López-López (2007)    | Are important bird areas and special protected areas enough for conservation?: The case of Bonelli's eagle in a Mediterranean area                                                                                          | 2007 |   | * |   | * |   | * | * |  |
| 27927447 | Lotterhos (2014)      | Evaluation of rockfish conservation area networks in the United States and Canada relative to the dispersal distance for black rockfish ( <i>Sebastes melanops</i> )                                                        | 2014 |   | * |   | * |   | * | * |  |
| 27929254 | Lourival (2011)       | What is Missing in Biosphere Reserves Accountability?                                                                                                                                                                       | 2011 |   | * |   | * | * | * | * |  |
| 27951924 | Lovejoy (1984)        | Application of ecological theory to conservation planning                                                                                                                                                                   | 1984 |   | * | * | * |   | * | * |  |
| 27938156 | Lovett-Doust (2003)   | Effects of land ownership and landscape-level factors on rare-species richness in natural areas of southern Ontario, Canada                                                                                                 | 2003 |   |   |   | * |   | * |   |  |
| 27927222 | Lu (2014)             | Zoning strategies for marine protected areas in Taiwan: Case study of Gueishan Island in Yilan County, Taiwan                                                                                                               | 2014 |   | * |   |   |   | * | * |  |
| 27951688 | Luce (2003)           | A multi-state conservation plan for the black-tailed prairie dog, <i>Cynomys ludovicianus</i> , in the United States                                                                                                        | 2003 |   | * |   | * |   | * | * |  |
| 27933454 | Lucena (2015)         | Environmental perception of rural communities and analysis of landscape: Subsidies for priority area for conservation proposition in the Rio Grande do Norte semiarid, Brazil                                               | 2015 |   | * |   | * | * | * | * |  |
| 27938358 | Lunney (2002)         | Achieving fauna conservation on private land: Reflections on a 10-year project                                                                                                                                              | 2002 |   | * |   | * |   | * | * |  |
| 27933968 | Lupp (2014)           | Participative scenarios as recipe for success for integrated development? Strategies in the context of tourism, renewable energies, conservation of biodiversity, and climatic adaptation on large-scale conservation areas | 2014 | * |   |   |   |   |   |   |  |
| 27930721 | Lynch (2006)          | Incorporation of recreational fishing effort into design of marine protected areas                                                                                                                                          | 2006 |   | * |   | * |   | * | * |  |
| 27940042 | Lynch (2010)          | Evaluating a science-based decision support tool used to prioritize brook charr conservation project proposals in the eastern United States.                                                                                | 2010 |   | * |   | * |   | * | * |  |

|          |                                      |                                                                                                                                                          |      |   |   |   |   |   |   |   |  |
|----------|--------------------------------------|----------------------------------------------------------------------------------------------------------------------------------------------------------|------|---|---|---|---|---|---|---|--|
| 27939037 | Lynch (2016)                         | Stakeholder views of management and decision support tools to integrate climate change into Great Lakes Lake Whitefish management                        | 2016 |   | * |   | * |   | * |   |  |
| 27930075 | Ma (2009)                            | Conflicts between biodiversity conservation and development in a biosphere reserve                                                                       | 2009 |   |   |   | * |   | * |   |  |
| 27933371 | Ma (2015)                            | Conservation effectiveness of broadleaved Korean pine forest in Changbai Mt. based on C-Plan systematic conservation planning software                   | 2015 | * |   |   |   |   |   |   |  |
| 33026269 | Mackovč in (2000)                    | A multi-level ecological network in the Czech Republic: Implementating the territorial system of ecological stability                                    | 2000 |   | * |   | * |   | * | * |  |
| 27931471 | Maddock (2000)                       | Identification of conservation-worthy areas in northern Zululand, South Africa                                                                           | 2000 |   | * |   | * | * | * | * |  |
| 27951998 | Maes (2002)                          | Evaluation conservation plan wallflowers: wallflower policy in the period 1988-2000                                                                      | 2002 | * |   |   |   |   |   |   |  |
| 27931815 | Malcolm (2016)                       | Size and age are important factors for marine sanctuaries: evidence from a decade of systematic sampling in a subtropical marine park                    | 2016 |   |   |   | * |   | * |   |  |
| 27951606 | Mamgain (1998)                       | Conservation assessment of some important threatened medicinal plants of India J                                                                         | 1998 | * |   |   |   |   |   |   |  |
| 27951942 | Mangel (2006)                        | Commentary: accounting for uncertainty in marine reserve design                                                                                          | 2006 |   | * | * | * |   | * | * |  |
| 27954426 | Mangubhai (2015)                     | Explicitly incorporating socioeconomic criteria and data into marine protected area zoning                                                               | 2015 |   | * |   |   |   |   | * |  |
| 27951425 | Manson (1994)                        | Natural communities conservation planning: California's new ecosystem approach to biodiversity                                                           | 1994 |   | * | * | * |   | * | * |  |
| 33026280 | Maree (2005)                         | Linking spatial planning, water resources management and biodiversity protection: A case study for the systematic conservation of rivers in South Africa | 2005 |   | * | * | * |   | * | * |  |
| 27969825 | Margules (2005)                      | Conservation planning at the landscape scale                                                                                                             | 2005 |   | * | * |   |   | * | * |  |
| 27940263 | Margules (2007)                      | Systematic conservation planning                                                                                                                         | 2007 |   | * | * |   |   | * | * |  |
| 27955199 | Marine reserve design... (Chiappone) | Marine reserve design criteria and measures of success: lessons learned from the Exuma Cays Land and Sea Park, Bahamas                                   | 2000 |   |   |   | * |   | * |   |  |
| 27934816 | Marot (2013)                         | Slovenia as the natural park of Europe? Territorial impact assessment in the case of Natura 2000                                                         | 2013 |   | * |   | * |   | * | * |  |
| 27951520 | Marsh (1995)                         | Focused, special-area conservation planning: An approach to reconciling development and environmental protection                                         | 1995 | * |   |   |   |   |   |   |  |
| 27930967 | Marshall (2005)                      | Monkey abundance and social structure in two high-elevation forest reserves in the Udzungwa Mountains of Tanzania                                        | 2005 |   | * |   | * |   | * | * |  |
| 27926949 | Martin-Garcia (2015)                 | Identification of conservation gaps and redesign of island marine protected areas                                                                        | 2015 |   | * |   | * | * | * | * |  |



|          |                                   |                                                                                                                                             |      |   |   |   |   |   |   |   |  |  |
|----------|-----------------------------------|---------------------------------------------------------------------------------------------------------------------------------------------|------|---|---|---|---|---|---|---|--|--|
| 27955246 | Mathematical Models.. (Lamberson) | Mathematical Models for Conservation Planning for Species Occupying Fragmented Landscapes                                                   | 1993 | * |   |   |   |   |   |   |  |  |
| 27940486 | Mathur (2006)                     | Gap analysis in protected area system in the Andaman and Nicobar Islands, India: implications for conservation planning.                    | 2006 | * |   |   |   |   |   |   |  |  |
| 33026268 | McAlpine (2007)                   | Regional planning in Queensland's rangelands: Challenges and prospects for biodiversity conservation                                        | 2007 |   | * |   | * | * | * | * |  |  |
| 27929683 | McBride (2010)                    | Mathematical problem definition for ecological restoration planning                                                                         | 2010 |   | * |   | * | * | * | * |  |  |
| 27932905 | McCarthy (2016)                   | Conserving phylogenetic diversity, with reference to Victorian eucalypts                                                                    | 2016 |   | * |   | * | * | * | * |  |  |
| 27951533 | McCaull (1994)                    | 14. The Natural Community Conservation Planning Program and the Coastal Sage Scrub Ecosystem                                                | 1994 | * |   |   |   |   |   |   |  |  |
| 27954525 | McClurg (1993)                    | Biodiversity and the Endangered Species Act                                                                                                 | 1993 | * |   |   |   |   |   |   |  |  |
| 27930467 | McDonald (2007)                   | Estimating the effect of protected lands on the development and conservation of their surroundings                                          | 2007 |   |   |   | * |   | * |   |  |  |
| 27936755 | McDonald-Madden (2009)            | "True" conservation progress                                                                                                                | 2009 |   | * |   | * |   | * | * |  |  |
| 27951773 | McDougal (2001)                   | Conservation assessment of freshwater fauna and habitat in the southern national forests                                                    | 2001 |   | * |   | * |   | * | * |  |  |
| 27930161 | McInerney (2009)                  | Understanding marine reserve function in a seascape genetics context: Nucella lapillus in Strangford Lough (Northern Ireland) as an example | 2009 |   | * |   | * |   | * | * |  |  |
| 27935107 | McInerney (2012)                  | Ecological coherence in marine reserve network design: An empirical evaluation of sequential site selection using genetic structure         | 2012 |   | * |   | * |   | * | * |  |  |
| 27936712 | McKinney (2009)                   | Prioritizing urban marine habitats for conservation                                                                                         | 2009 |   | * |   | * |   | * | * |  |  |
| 28987790 | Measuring (2014)                  | US Forest Service Participating Agency Program Agreement (PAPA) Evaluation Report                                                           | 2014 |   |   |   | * |   | * | * |  |  |
| 27940264 | Medarevic (2006)                  | Problems of sustainable forest management implementation - the example of the spatial plan for the special purpose reserve Golija/Serbia.   | 2006 | * |   |   |   |   |   |   |  |  |
| 27952009 | Medley (2008)                     | Evaluation of The Nature Conservancy's Rapid Action Conservation Plan: The South Sound Inlets Case Study                                    | 2008 |   | * |   | * |   | * | * |  |  |
| 27937037 | Mehl (2008)                       | A summary of conservation planning efforts in forested regions of the United States                                                         | 2008 | * |   |   |   |   |   |   |  |  |
| 27933892 | Mehri (2014)                      | Use of optimization algorithms to prioritize protected areas in Mazandaran Province of Iran                                                 | 2014 |   | * |   | * | * | * | * |  |  |
| 27954516 | Melious (1999)                    | Contractual ecosystem management under the Endangered Species Act: can federal agencies make enforceable commitments?                       | 1999 |   | * | * | * |   | * | * |  |  |
| 33026250 | Mendel (2002)                     | Historical progress of biodiversity conservation in the protected-area system of Tasmania, Australia                                        | 2002 |   | * |   |   |   |   |   |  |  |

|          |                        |                                                                                                                                                                    |      |   |   |   |   |   |   |   |  |
|----------|------------------------|--------------------------------------------------------------------------------------------------------------------------------------------------------------------|------|---|---|---|---|---|---|---|--|
| 27927183 | Meretsk<br>y (2014)    | Learning from Conservation<br>Planning for the US National<br>Wildlife Refuges                                                                                     | 2014 |   | * |   | * | * | * | * |  |
| 27926575 | Metcalf<br>(2015)      | Spatial, socio-economic, and<br>ecological implications of<br>incorporating minimum size<br>constraints in marine protected<br>area network design                 | 2015 |   | * |   | * | * | * | * |  |
| 27926766 | Meyer<br>(2015)        | An analysis of spatio-temporal<br>landscape patterns for protected<br>areas in northern New England:<br>1900-2010                                                  | 2015 |   | * |   | * |   | * | * |  |
| 27934662 | Micheli<br>(2013)      | Setting Priorities for Regional<br>Conservation Planning in the<br>Mediterranean Sea                                                                               | 2013 |   | * | * | * |   | * | * |  |
| 27930843 | Miclat<br>(2006)       | Planning across boundaries for the<br>conservation of the Sulu-Sulawesi<br>Marine Ecoregion                                                                        | 2006 |   | * |   | * | * | * | * |  |
| 27934131 | Miethe<br>(2014)       | Impact assessment of a fisheries<br>closure with effort and landings<br>spatial analyses: A case study in<br>the Western Baltic Sea                                | 2014 |   |   |   | * |   | * |   |  |
| 27931797 | Mikolas<br>(2017)      | Forest management impacts on<br>capercaillie (Tetrao urogallus)<br>habitat distribution and connectivity<br>in the Carpathians                                     | 2017 |   |   |   | * |   | * |   |  |
| 28366735 | Miles<br>(2010)        | REDD-plus and biodiversity:<br>opportunities and challenges                                                                                                        | 2010 |   | * |   | * |   | * | * |  |
| 27930139 | Miller<br>(2009)       | Biodiversity Conservation in Local<br>Planning                                                                                                                     | 2009 |   | * |   | * |   | * | * |  |
| 27929446 | Miller<br>(2011)       | Assessing the effectiveness of<br>Madagascar's changing protected<br>areas system: a case study of<br>threatened Boraginales                                       | 2011 |   | * |   | * |   | * | * |  |
| 27929266 | Mills<br>(2011)        | Incorporating Effectiveness of<br>Community-Based Management in<br>a National Marine Gap Analysis for<br>Fiji                                                      | 2011 |   |   |   | * |   | * |   |  |
| 27935944 | Miquelle<br>(2010)     | Science-Based Conservation of<br>Amur Tigers in the Russian Far<br>East and Northeast China                                                                        | 2010 |   | * |   | * | * | * | * |  |
| 27929670 | Mitrovich<br>(2010)    | Ants as a Measure of Effectiveness<br>of Habitat Conservation Planning in<br>Southern California                                                                   | 2010 |   |   |   | * |   | * |   |  |
| 27928744 | Moland<br>(2007)       | Lobster and cod benefit from small-<br>scale northern marine protected<br>areas: inference from an empirical<br>before - after control-impact study                | 2007 |   |   |   | * |   | * |   |  |
| 27951578 | Moland<br>(2011)       | Activity patterns of wild European<br>lobster Homarus gammarus in<br>coastal marine reserves:<br>implications for future reserve<br>design                         | 2011 |   | * |   | * |   | * | * |  |
| 27935655 | Moland<br>(2011)       | Home range of European lobster<br>(Homarus gammarus) in a marine<br>reserve: Implications for future<br>reserve design                                             | 2011 |   | * |   | * |   | * | * |  |
| 27928857 | Moland<br>(2013)       | Long-term decrease in sex-specific<br>natural mortality of European<br>lobster within a marine protected<br>area                                                   | 2013 |   |   |   | * |   | * |   |  |
| 27951690 | Molur<br>(1998)        | Conservation assessment of the<br>herpetofauna of India-an overview                                                                                                | 1998 | * |   |   |   |   |   |   |  |
| 27951723 | Molur<br>(2001)        | Conservation assessment and<br>management plan                                                                                                                     | 2001 | * |   |   |   |   |   |   |  |
| 27951278 | Molur<br>(2005)        | Status of south Asian non-volant<br>small mammals: conservation<br>assessment and management plan<br>(CAMP) workshop report                                        | 2005 |   | * |   | * |   | * | * |  |
| 27932470 | MONTA<br>LVO<br>(2016) | Effectiveness of the network of<br>protected areas of the South<br>Caucasus at representing<br>terrestrial ecosystems after the<br>dissolution of the Soviet Union | 2016 |   | * |   | * |   | * | * |  |

|          |                            |                                                                                                                                                      |      |   |   |  |   |   |   |   |  |
|----------|----------------------------|------------------------------------------------------------------------------------------------------------------------------------------------------|------|---|---|--|---|---|---|---|--|
| 27951322 | Moorcroft (2012)           | Conservation planning in a cross-cultural context: the Wunambal Gaambera Healthy Country Project in the Kimberley, Western Australia                 | 2012 |   | * |  | * |   | * | * |  |
| 27933002 | Morales (2016)             | Conservation biogeography in the Mexican mountain component: Bridging conservation and patterns of endemism                                          | 2016 |   | * |  | * | * | * | * |  |
| 27929994 | Morrison (2009)            | Landscape-scale spatial planning at WWF: a variety of approaches                                                                                     | 2009 |   | * |  |   |   |   | * |  |
| 27930100 | Morrison (2009)            | Conserving Connectivity: Some Lessons from Mountain Lions in Southern California                                                                     | 2009 |   | * |  | * |   | * | * |  |
| 27933975 | Morzaria-Luna (2014)       | Conservation strategies for coastal wetlands in the Gulf of California, Mexico                                                                       | 2014 |   | * |  | * |   | * | * |  |
| 27952075 | Mueller (1982)             | Principles of nature conservation planning "Westerwälder Seenplatte" 3. Project work                                                                 | 1982 | * |   |  |   |   |   |   |  |
| 27934874 | Muntean (2013)             | Assessment of environmental vulnerabilities and constraints in the Vascau Plateau (Natura 2000 protected area, Romania)                              | 2013 |   | * |  | * |   | * | * |  |
| 27954520 | Murray (1997)              | An endangered habitat act to help landowners protect wildlife                                                                                        | 1997 | * |   |  |   |   |   |   |  |
| 27938545 | Musick (2000)              | Protection of marine fish stocks at risk of extinction                                                                                               | 2000 |   | * |  | * |   | * | * |  |
| 27926807 | Mutanga (2015)             | Community perceptions of wildlife conservation and tourism: A case study of communities adjacent to four protected areas in Zimbabwe                 | 2015 |   |   |  | * |   | * |   |  |
| 27936084 | Mwangi (2010)              | Tracking trends in key sites for biodiversity: A case study using Important Bird Areas in Kenya                                                      | 2010 |   |   |  | * | * | * |   |  |
| 27951065 | Nair (1991)                | The southern Western Ghats: a biodiversity conservation plan                                                                                         | 1991 | * |   |  |   |   |   |   |  |
| 33026254 | Nakae_2003_Quasi-national. | The necessity for conservation plan of the impressive natural landscape in the coast in GENKAI quasi-national park                                   |      | * |   |  |   |   |   |   |  |
| 27930898 | Nalle (2005)               | A comparison of fixed-site and non-fixed-site approaches for species protection                                                                      | 2005 |   | * |  | * |   | * | * |  |
| 27932792 | Nash (2016)                | Using local ecological knowledge to determine status and threats of the Critically Endangered Chinese pangolin (Manis pentadactyla) in Hainan, China | 2016 |   | * |  | * |   | * | * |  |
| 27937954 | Natori (2005)              | Empowering nature conservation in Japanese rural areas: A planning strategy integrating visual and biological landscape perspectives                 | 2005 |   | * |  | * |   | * | * |  |
| 27955173 | Nature Conservation,...    | Nature Conservation, Planning and the Habitats Directive                                                                                             | 1995 | * |   |  |   |   |   |   |  |
| 27938777 | Neely (1997)               | Orange County Central and Coastal program                                                                                                            | 1997 | * |   |  |   |   |   |   |  |
| 27930430 | Neely (2008)               | Applying marine protected area design models in large estuarine systems                                                                              | 2008 |   | * |  | * | * | * | * |  |
| 27938231 | Negi (2003)                | Indigenous peoples, biological diversity and protected area management — policy framework towards resolving conflicts                                | 2003 |   | * |  | * |   | * | * |  |
| 27951943 | Nel (2006)                 | Conservation assessment of freshwater biodiversity in the Olifants/Doorn Water Management Area: Final report                                         | 2006 | * |   |  |   |   |   |   |  |
| 27932849 | Nel (2016)                 | Knowledge co-production and boundary work to promote implementation of conservation plans                                                            | 2016 |   | * |  |   |   |   | * |  |

|          |                                      |                                                                                                                                                                      |      |   |   |   |   |   |   |   |  |
|----------|--------------------------------------|----------------------------------------------------------------------------------------------------------------------------------------------------------------------|------|---|---|---|---|---|---|---|--|
| 27951904 | Nelson (1999)                        | Habitat conservation planning                                                                                                                                        | 1999 |   | * | * | * |   | * | * |  |
| 27927290 | Newsome (2014)                       | Tourism and conservation in Madagascar: The importance of Andasibe National Park                                                                                     | 2014 |   |   |   | * |   | * | * |  |
| 27928889 | Ngugi (2013)                         | Application of a forest dynamics simulator to inform sustainable biodiversity conservation and grazing management in Australia                                       | 2013 |   | * |   | * |   | * | * |  |
| 33026299 | Ngusaru (2009)                       | The Eastern African Marine Ecoregion Conservation Plan 2005 - 2009                                                                                                   | 2009 |   | * |   | * |   | * | * |  |
| 27969853 | Nicholls (2002)                      | Evaluation of Data, Modelling Techniques and Conservation Assessment Tools for the Lower Hunter Central Coast Regional Biodiversity Conservation Strategy            | 2002 | * |   |   |   |   |   |   |  |
| 27951697 | Nijkamp (1991)                       | Evaluation measurement in conservation planning                                                                                                                      | 1991 |   | * | * | * |   | * | * |  |
| 27929894 | Nislow (2010)                        | Aquatic Conservation Planning at a Landscape Scale                                                                                                                   | 2010 | * |   |   |   |   |   |   |  |
| 33026325 | No Title (Abell)                     | Ecoregion Conservation for Freshwater Systems, With a Focus on Large Rivers                                                                                          |      |   | * |   | * | * | * | * |  |
| 27933524 | Noguera-Savelli (2015)               | The floristic composition and biodiversity of Orchidaceae in the Guatopo National Park, Venezuela and the urgent need for the conservation of the parks biodiversity | 2015 |   | * |   | * |   | * | * |  |
| 27932419 | Nori (2016)                          | Protected areas and spatial conservation priorities for endemic vertebrates of the Gran Chaco, one of the most threatened ecoregions of the world                    | 2016 |   | * |   | * | * | * | * |  |
| 33026292 | North (2005)                         | Thornborough Henges conservation plan: Public consultation draft                                                                                                     | 2005 |   | * | * | * |   | * | * |  |
| 27955330 | North West Otters and... (Twiss)     | North West Otters and Rivers Project: The River Eden Otter Conservation Plan September 1992                                                                          | 1993 | * |   |   |   |   |   |   |  |
| 27951771 | Northern (2002)                      | A Conservation Plan for the Daly Basin Bioregion: Draft for Public Consultation                                                                                      | 2003 |   | * |   |   |   |   | * |  |
| 27955210 | NORTH ERN MIXED GRASS. .. (Erickson) | NORTHERN MIXED GRASS PRAIRIE CONSERVATION PLANNING INITIATIVE - A TRANSBOUNDARY PARTNERSHIP                                                                          | 2004 | * |   |   |   |   |   |   |  |
| 27931501 | Noss (1999)                          | A conservation plan for the Klamat-Siskiyou ecoregion                                                                                                                | 1999 |   | * |   | * | * | * | * |  |
| 27951631 | Noss (2000)                          | Conservation planning in the redwood region                                                                                                                          | 2000 | * |   |   |   |   |   |   |  |
| 27951909 | Noss (2001)                          | A biological conservation assessment for the Utah-Wyoming-Rocky Mountains Ecoregion: a report to The Nature Conservancy. Conservation Science                        | 2001 |   | * |   |   |   | * | * |  |
| 33026258 | Noss (2001)                          | A biological conservation assessment for the Greater Yellowstone Ecosystem: Report to the Greater Yellowstone Coalition                                              | 2001 |   | * |   |   |   | * | * |  |
| 27927501 | Nuno (2014)                          | Managing social-ecological systems under uncertainty: implementation in the real world                                                                               | 2014 |   | * |   | * |   | * | * |  |

|          |                                         |                                                                                                                                                                            |      |   |   |   |   |   |   |   |  |
|----------|-----------------------------------------|----------------------------------------------------------------------------------------------------------------------------------------------------------------------------|------|---|---|---|---|---|---|---|--|
| 27935007 | Nutters (2012)                          | Fishery stakeholder engagement and marine spatial planning: Lessons from the Rhode Island Ocean SAMP and the Massachusetts Ocean Management Plan                           | 2012 |   |   |   |   |   |   | * |  |
| 27935949 | Oberholzer (2010)                       | The socio-economic impact of Africa's oldest marine park                                                                                                                   | 2010 |   |   |   | * |   | * |   |  |
| 33026252 | Obukhov (2008)                          | Town of Newbury, New Hampshire Townside Conservation Plan                                                                                                                  | 2008 |   | * |   | * |   | * | * |  |
| 27955201 | Of Mice and Men: Boulder's... (Crifasi) | Of Mice and Men: Boulder's Preble's Meadow Jumping Mouse Habitat Conservation Plan                                                                                         | 2001 | * |   |   |   |   |   |   |  |
| 27934857 | Ohmann (2013)                           | Landscape context for density management: Implications of land ownership and ecological gradients                                                                          | 2013 | * |   |   |   |   |   |   |  |
| 27951667 | Okoba (2007)                            | Participatory soil and water conservation planning using an erosion mapping tool in the central highlands of Kenya                                                         | 2007 |   | * |   | * |   | * | * |  |
| 27927250 | Olds (2014)                             | Incorporating Surrogate Species and Seascape Connectivity to Improve Marine Conservation Outcomes                                                                          | 2014 |   |   |   | * |   | * |   |  |
| 27931679 | Olmstead (1996)                         | The Illinois River-Floodplain ecosystem: Conservation planning on a watershed-scale                                                                                        | 1996 |   | * |   |   |   | * | * |  |
| 27954450 | Olsen (2014)                            | The State of Rhode Island's pioneering marine spatial plan                                                                                                                 | 2014 |   | * |   | * |   | * | * |  |
| 33026347 | Olson (2001)                            | Terrestrial Ecoregions of the World: A New Map of Life on Earth                                                                                                            | 2001 |   | * | * | * |   | * | * |  |
| 27931867 | Olsoy (2016)                            | Quantifying the effects of deforestation and fragmentation on a range-wide conservation plan for jaguars                                                                   | 2016 |   |   |   | * |   | * |   |  |
| 27934773 | Onaindia (2013)                         | Co-benefits and trade-offs between biodiversity, carbon storage and water flow regulation                                                                                  | 2013 |   | * |   | * | * | * | * |  |
| 33026208 | Ontario (2009)                          | Ontario's Woodland Caribou Conservation Plan                                                                                                                               | 2009 |   | * |   | * |   | * | * |  |
| 27955285 | Orsini's Viper Vipera... (Penloup)      | Orsini's Viper Vipera ursinii in France: present status and proposals for a conservation plan                                                                              | 1999 | * |   |   |   |   |   |   |  |
| 27954487 | Osmond (2010)                           | Lessons for marine conservation planning: A comparison of three marine protected area planning processes                                                                   | 2010 |   | * |   |   |   |   | * |  |
| 27929589 | O'Sullivan (2011)                       | Marine reserve designation, trophic cascades and altered community dynamics                                                                                                | 2011 |   |   |   | * |   | * |   |  |
| 27952001 | Otto (2005)                             | "It's Not Just the Species Anymore": A Qualitative Evaluation of the Balcones Canyonland Conservation Plan at Ten Years                                                    | 2005 | * |   |   |   |   |   |   |  |
| 27933879 | Ouellette (2014)                        | The Endangered Species Act and Habitat Conservation Plans                                                                                                                  | 2014 | * |   |   |   |   |   |   |  |
| 27931850 | Ovando (2016)                           | Market and design solutions to the short-term economic impacts of marine reserves                                                                                          | 2016 |   | * | * | * |   | * | * |  |
| 27926770 | Paiva (2015)                            | The Role of Protected Areas in the Avoidance of Anthropogenic Conversion in a High Pressure Region: A Matching Method Analysis in the Core Region of the Brazilian Cerrado | 2015 |   |   |   | * |   | * |   |  |

|          |                     |                                                                                                                                     |      |   |   |  |   |   |   |   |  |
|----------|---------------------|-------------------------------------------------------------------------------------------------------------------------------------|------|---|---|--|---|---|---|---|--|
| 27933825 | Palomo (2014)       | Deliberative mapping of ecosystem services within and around Doñana National Park (SW Spain) in relation to land use change         | 2014 |   |   |  | * |   | * |   |  |
| 27935271 | Pande (2012)        | The Kapiti Marine Reserve (New Zealand): Spatial and temporal comparisons of multi-species responses after 8 years of protection    | 2012 |   |   |  | * |   | * |   |  |
| 27926797 | Panno (2015)        | Are state growth management programs viable tools for biodiversity conservation? A case study examining Florida local governments   | 2015 |   | * |  | * | * | * | * |  |
| 27938373 | Parks (2002)        | Reserve size, local human density, and mammalian extinctions in U.S. protected areas                                                | 2002 |   | * |  | * |   | * | * |  |
| 27929249 | Parrott (2011)      | A decision support system to assist the sustainable management of navigation activities in the St. Lawrence River Estuary, Canada   | 2011 |   | * |  | * |   | * | * |  |
| 33026243 | Partnership (2007)  | Stream Corridor Plan LaPlatte River and Tributaries Town of Hinesburg, Vermont                                                      | 2007 |   | * |  | * |   | * | * |  |
| 27931848 | Pascual (2016)      | Socioeconomic impacts of marine protected areas in the Mediterranean and Black Seas                                                 | 2016 |   |   |  | * |   | * |   |  |
| 27932507 | Pasnin (2016)       | Marine systematic conservation planning for Rodrigues Island, western Indian Ocean                                                  | 2016 |   | * |  | * | * | * | * |  |
| 27939377 | Patterson (2014)    | Conservation Action Planning: lessons learned from the St. Marys River watershed biodiversity conservation planning process         | 2014 | * |   |  |   |   |   |   |  |
| 27927047 | Paudel (2015)       | Conservation planning in the Nepal Himalayas: Effectively (re)designing reserves for heterogeneous landscapes                       | 2015 |   | * |  | * |   | * | * |  |
| 27951743 | Pence (2008)        | CAPE Fine-scale systematic conservation planning assessment: Technical report                                                       | 2008 |   | * |  |   |   |   | * |  |
| 33026270 | Pender (2015)       | 2005-2010 Regional Conservation Plan Update                                                                                         | 2008 |   | * |  | * | * |   | * |  |
| 33026277 | Pennsylvania (2006) | Conservation Plan for the Kittatinny Ridge in Pennsylvania                                                                          | 2006 |   | * |  | * |   | * | * |  |
| 27954521 | Persoon (1996)      | Exploitation, management and conservation of marine resources: the context of the Aru Tenggara Marine Reserve (Moluccas, Indonesia) | 1996 |   | * |  | * |   | * | * |  |
| 27969832 | Pert (2010)         | Local conservation planning and spatial habitat prioritization: A case study from Mission Beach, Far North Queensland.              | 2010 |   | * |  | * | * | * | * |  |
| 27930165 | Pfaff (2009)        | Park Location Affects Forest Protection: Land Characteristics Cause Differences in Park Impacts across Costa Rica                   | 2009 |   |   |  | * |   | * |   |  |
| 27933205 | Pfaff (2015)        | Protected areas? Impacts on Brazilian Amazon deforestation: Examining conservation - Development interactions to inform planning    | 2015 |   |   |  | * |   | * |   |  |
| 27929034 | Pfeifer (2012)      | Protected Areas: Mixed Success in Conserving East Africa's Evergreen Forests                                                        | 2012 |   |   |  | * |   | * |   |  |
| 27936674 | Phil-Eze (2009)     | Sustainable biodiversity conservation in the Niger Delta: A practical approach to conservation site selection                       | 2009 |   | * |  | * |   | * | * |  |

|          |                                        |                                                                                                                                                                                  |      |   |   |   |   |  |   |   |  |
|----------|----------------------------------------|----------------------------------------------------------------------------------------------------------------------------------------------------------------------------------|------|---|---|---|---|--|---|---|--|
| 27955186 | Philippine pteridophyte... (Barcelona) | Philippine pteridophyte collections as a resource for conservation planning                                                                                                      | 2002 | * |   |   |   |  |   |   |  |
| 27951930 | Phua (2000)                            | Evaluation of environmental functions of tropical forest in Kinabalu Park, Sabah, Malaysia using GIS and remote sensing techniques: Implications to forest conservation planning | 2000 |   | * |   | * |  | * | * |  |
| 27930873 | Pierce (2005)                          | Systematic conservation planning products for land-use planning: Interpretation for implementation                                                                               | 2005 |   | * |   |   |  |   | * |  |
| 27954504 | Pincetl (2006)                         | Conservation planning in the west, problems, new strategies and entrenched obstacles                                                                                             | 2006 | * |   |   |   |  |   |   |  |
| 27930097 | Pinto (2009)                           | Reserve selection and persistence: complementing the existing Atlantic Forest reserve system                                                                                     | 2009 |   | * |   | * |  | * | * |  |
| 27927228 | Pinto (2014)                           | Multi-Scales Analysis of Primate Diversity and Protected Areas at a Megadiverse Region                                                                                           | 2014 |   | * |   | * |  | * | * |  |
| 27934050 | Pipitone (2014)                        | Spatial Management of Fisheries in the Mediterranean Sea: Problematic Issues and a Few Success Stories                                                                           | 2014 |   |   |   | * |  | * |   |  |
| 27928920 | Piquer-Rodriguez (2012)                | Future land use effects on the connectivity of protected area networks in southeastern Spain                                                                                     | 2012 |   | * |   | * |  | * | * |  |
| 27954475 | Pitzer (2011)                          | Western Water: Making the Connection: Sound Science and Good Delta Policy                                                                                                        | 2011 | * |   |   |   |  |   |   |  |
| 27931957 | Piwowarczyk (2016)                     | Determinants of legitimate governance of marine Natura 2000 sites in a post-transition European Union country: A case study of Puck Bay, Poland                                  | 2016 |   | * |   | * |  | * | * |  |
| 27951598 | Plan (2009)                            | An overview of the draft conservation strategy for the Bay Delta Conservation Plan                                                                                               | 2009 |   | * |   |   |  | * | * |  |
| 27951599 | Plan (2010)                            | Bay Delta conservation plan                                                                                                                                                      | 2010 |   | * |   | * |  | * | * |  |
| 27951486 | Planning (2004)                        | The Canberra spatial plan                                                                                                                                                        | 2004 | * |   |   |   |  |   |   |  |
| 27969894 | Poiner (1997)                          | Torres Strait conservation planning project: overview report                                                                                                                     | 1997 | * |   |   |   |  |   |   |  |
| 27951530 | Pollak (2001)                          | Natural Community Conservation Planning (NCCP): the origins of an ambitious experiment to protect ecosystems                                                                     | 2001 | * |   |   |   |  |   |   |  |
| 27952042 | Pope (2013)                            | Planning and assessment for biodiversity conservation at a landscape-scale: an evaluation of current approaches and opportunities in Australia                                   | 2013 |   | * | * | * |  | * | * |  |
| 27929293 | Portman (2011)                         | Marine spatial planning: achieving and evaluating integration                                                                                                                    | 2011 |   | * |   | * |  | * | * |  |
| 27930384 | Posa (2008)                            | Hope for threatened tropical biodiversity: Lessons from the Philippines                                                                                                          | 2008 |   |   |   | * |  | * |   |  |
| 27928529 | Potts (2013)                           | Testing large-scale conservation corridors designed for patterns and processes: comparative phylogeography of three tree species                                                 | 2013 |   | * |   | * |  | * | * |  |
| 33026261 | Povilitis (1996)                       | The Gila River-Sky Island Bioregion: A call for bold conservation action                                                                                                         | 1996 |   | * |   | * |  | * | * |  |

|          |                                  |                                                                                                                                                                     |      |   |   |   |   |   |   |   |  |
|----------|----------------------------------|---------------------------------------------------------------------------------------------------------------------------------------------------------------------|------|---|---|---|---|---|---|---|--|
| 27951077 | Powell (1995)                    | Implications of intratropical migration on reserve design: a case study using <i>Pharomachrus mocinno</i>                                                           | 1995 |   |   |   | * |   | * |   |  |
| 27929893 | Powell (2010)                    | Developing Institutions to Overcome Governance Barriers to Ecoregional Conservation                                                                                 | 2010 | * |   |   |   |   |   |   |  |
| 27938519 | Pressey (2001)                   | Sampling of land types by protected areas: Three measures of effectiveness applied to western New South Wales                                                       | 2001 |   | * |   | * |   | * | * |  |
| 33026359 | Pressey (2001)                   | Scheduling conservation action in production landscapes: Priority areas in western New South Wales defined by irreplaceability and vulnerability to vegetation loss | 2001 |   |   |   | * | * |   |   |  |
| 27938425 | Pressey (2002)                   | Effectiveness of protected areas in north-eastern New South Wales: Recent trends in six measures                                                                    | 2002 |   |   |   |   |   |   | * |  |
| 27940589 | Pressey (2004)                   | Conservation of terrestrial environments in the Darling River Basin.                                                                                                | 2004 | * |   |   |   |   |   |   |  |
| 27928551 | Pressey (2013)                   | The plan of the day: Managing the dynamic transition from regional conservation designs to local conservation actions                                               | 2013 |   | * |   |   |   |   | * |  |
| 27938351 | Prieditis (2002)                 | Evaluation frameworks and conservation system of Latvian forests                                                                                                    | 2002 |   | * |   | * |   | * | * |  |
| 27929284 | Proctor (2011)                   | Protected areas of Borneo fail to protect forest landscapes with high habitat connectivity                                                                          | 2011 |   | * |   | * | * | * | * |  |
| 27955180 | Project ReefAction:... (Andrews) | Project ReefAction: An Example of Conservation Planning and Action at the National Aquarium in Baltimore                                                            | 1996 | * |   |   |   |   |   |   |  |
| 27936649 | Puddu (2009)                     | Spatial-explicit assessment of current and future conservation options for the endangered Corsican red deer ( <i>Cervus elaphus Corsicanus</i> ) in Sardinia        | 2009 |   | * |   | * | * | * | * |  |
| 27939822 | Punt (2011)                      | Optimal management of marine resources: spatial planning of multiple uses of multiple actors.                                                                       | 2011 |   | * |   | * |   | * | * |  |
| 27926863 | Qi (2015)                        | Using habitat models to evaluate protected area designing for giant pandas                                                                                          | 2015 |   | * |   | * | * | * | * |  |
| 27933369 | Qu (2015)                        | SCP (systematic conservation planning) optimization for a wetland conservation network system on Sanjiang plain, China                                              | 2015 | * |   |   |   |   |   |   |  |
| 27926969 | Ramirez (2010)                   | Evaluation of the effects on rockfish and kelp artisanal fisheries of the proposed Mejillones Peninsula marine protected area (northern Chile, SE Pacific coast)    | 2015 |   | * |   | * |   | * | * |  |
| 27935351 | Ramirez-Acosta (2012)            | Conservation of endemic terrestrial vertebrates in the protected areas of the Baja California Peninsula, Mexico                                                     | 2012 |   | * |   | * |   | * | * |  |
| 33026220 | Rangelley (2005)                 | Marine protected areas (MPAs) in regional conservation planning: A framework for the Scotian shelf and Gulf of Maine                                                | 2005 |   | * | * | * |   | * | * |  |
| 27955238 | Ranging Patterns of... (Joshua)  | Ranging Patterns of Elephants in Rajaji National Park: Implications for Reserve Design                                                                              | 1995 | * |   |   |   |   |   |   |  |
| 27940683 | Rao (2002)                       | Status review of the protected-area system in Myanmar, with recommendations for conservation planning.                                                              | 2002 |   | * |   | * |   | * | * |  |



|          |                                                        |                                                                                                                                                                         |      |   |   |   |   |   |   |   |  |
|----------|--------------------------------------------------------|-------------------------------------------------------------------------------------------------------------------------------------------------------------------------|------|---|---|---|---|---|---|---|--|
| 27955333 | Raptor conserv<br>ation...<br>(Viada)                  | Raptor conservation plan for the Balearic Islands (1992-1994)                                                                                                           | 1996 | * |   |   |   |   |   |   |  |
| 27931707 | RATHB<br>UN<br>(1995)                                  | CONSERVATION ISSUES AND STRATEGIES FOR ELEPHANT-SHREWS                                                                                                                  | 1995 |   | * |   | * |   | * | * |  |
| 27926894 | Rayan<br>(2015)                                        | Conserving tigers in Malaysia: A science-driven approach for eliciting conservation policy change                                                                       | 2015 |   |   |   | * | * | * |   |  |
| 27935657 | Rayn<br>(2011)                                         | Impact of nature reserve establishment on deforestation: A test                                                                                                         | 2011 |   |   |   | * |   | * |   |  |
| 27955190 | Reconcil<br>ing<br>Urban<br>Growth..<br>.<br>(Beatley) | Reconciling Urban Growth and Endangered Species: The Coachella Valley Habitat Conservation Plan                                                                         | 1994 | * |   |   |   |   |   |   |  |
| 27951396 | Reddy<br>(2008)                                        | First red list of medicinal plants of Andhra Pradesh, India- conservation assessment and management planning                                                            | 2008 |   | * |   | * |   | * | * |  |
| 27929845 | Rees<br>(2010)                                         | Is there a win-win scenario for marine nature conservation? A case study of Lyme Bay, England                                                                           | 2010 |   |   |   | * |   | * |   |  |
| 27926590 | Rees<br>(2015)                                         | The socio-economic effects of a Marine Protected Area on the ecosystem service of leisure and recreation                                                                | 2015 |   |   |   | * |   | * |   |  |
| 27969843 | Reeson<br>(2008)                                       | CSE45 Achieving coordinated landscape scale outcomes with auction mechanisms. final report for Land and Water Australia, June 2008                                      | 2008 | * |   |   |   |   |   |   |  |
| 27955312 | Regional<br>Conserv<br>ation...<br>(Smith)             | Regional Conservation Planning: Protection of Regional Natural Areas and Resource Lands                                                                                 |      | * |   |   |   |   |   |   |  |
| 27927401 | Reid<br>(2004)                                         | Landscape Context Mediates Avian Habitat Choice in Tropical Forest Restoration                                                                                          | 2004 |   |   |   | * |   | * |   |  |
| 27929483 | Remis<br>(2011)                                        | Primate and ungulate abundance in response to multi-use zoning and human extractive activities in a Central African Reserve                                             | 2011 |   |   |   | * |   | * |   |  |
| 27955283 | Remote<br>Sensing<br>and<br>GIS...<br>(Patel)          | Remote Sensing and GIS Based Approach for Conservation Planning of a Hilly Watershed                                                                                    | 2001 | * |   |   |   |   |   |   |  |
| 27955188 | Reserve<br>Design<br>and<br>the...<br>(Barrett)        | Reserve Design and the New Conservation Theory                                                                                                                          | 1997 |   | * | * | * |   | * | * |  |
| 27955261 | Resolvin<br>g<br>Endange<br>red...<br>(Mertz)          | Resolving Endangered Species Conflicts: Wind Farm Habitat Conservation Planning                                                                                         | 2009 | * |   |   |   |   |   |   |  |
| 27951517 | ReVelle<br>(2002)                                      | Reserve design and facility siting                                                                                                                                      | 2002 | * |   |   |   |   |   |   |  |
| 27930519 | Reyers<br>(2007)                                       | Developing products for conservation decision-making: lessons from a spatial biodiversity assessment for South Africa                                                   | 2007 |   | * |   |   |   |   | * |  |
| 27934576 | Reza<br>(2013)                                         | Integrating GIS and expert judgment in a multi-criteria analysis to map and develop a habitat suitability index: A case study of large mammals on the Malayan Peninsula | 2013 |   | * |   | * | * | * | * |  |

|          |                                    |                                                                                                                                                                   |      |   |   |   |   |  |   |   |  |
|----------|------------------------------------|-------------------------------------------------------------------------------------------------------------------------------------------------------------------|------|---|---|---|---|--|---|---|--|
| 27934932 | Rice (2012)                        | The role of MPAs in reconciling fisheries management with conservation of biological diversity                                                                    | 2012 |   | * |   | * |  | * | * |  |
| 33026238 | River (2005)                       | Royal River Region Conservation Plan                                                                                                                              | 2005 |   | * |   | * |  | * | * |  |
| 33026248 | River Conservation Plan... (River) | River Conservation Plan the Middle Youghiogheny River Corridor                                                                                                    |      |   | * |   | * |  | * | * |  |
| 27951952 | Robinson (1999)                    | Survey and Preparation of a preliminary conservation plan for the Cestos-Senkwehn Riversheds of south-eastern Liberia                                             | 1999 | * |   |   |   |  |   |   |  |
| 33026341 | Robinson (2002)                    | The Draft Coniferous Forest Bird Conservation Plan Conservation Plan Lead Authors :                                                                               | 2002 |   | * |   | * |  | * | * |  |
| 27969838 | Robinson (2011)                    | Country-based planning as a new environmental planning paradigm                                                                                                   | 2011 | * |   |   |   |  |   |   |  |
| 27929690 | Rodder (2010)                      | Fading of the last giants: an assessment of habitat availability of the Sunda gharial <i>Tomistoma schlegelii</i> and coverage with protected areas               | 2010 |   | * |   | * |  | * | * |  |
| 27930995 | Rodriguez (2005)                   | Cross sector partnership results in increased marine biodiversity information, awareness, and an initial biodiversity action plan in the Gulf of Paria, Venezuela | 2005 |   | * |   | * |  | * | * |  |
| 27928923 | Rodriguez-Rodriguez (2012)         | Proposal of a system for the integrated and comparative assessment of protected areas                                                                             | 2012 |   | * | * | * |  | * | * |  |
| 27933297 | Rodríguez-Rodríguez (2015)         | Assessing the socioeconomic effects of multiple-use MPAs in a European setting: A national stakeholders' perspective                                              | 2015 |   |   |   | * |  | * | * |  |
| 27928662 | Rogers (2013)                      | The inclusion of non-market values in systematic conservation planning to enhance policy relevance                                                                | 2013 |   | * |   |   |  | * | * |  |
| 27928890 | Rojas-Bracho (2013)                | Vaquitas and gillnets: Mexico's ultimate cetacean conservation challenge                                                                                          | 2013 |   |   |   | * |  | * |   |  |
| 27931865 | Rolim (2016)                       | Effects of marine protected areas on fisheries: the case of Sao Paulo State, Brazil                                                                               | 2016 |   |   |   | * |  | * |   |  |
| 27951892 | Ronald (1984)                      | A conservation plan for <i>Monachus monachus</i> on Greek islands and coasts                                                                                      | 1984 | * |   |   |   |  |   |   |  |
| 27928927 | Ronconi (2012)                     | The role of seabirds in Marine Protected Area identification, delineation, and monitoring: Introduction and synthesis                                             | 2012 |   | * |   | * |  | * | * |  |
| 27951920 | Rondini (2007)                     | Special section: systematic conservation planning in the European landscape: conflicts, environmental changes, and the challenge of countdown 2010                | 2007 |   | * | * | * |  | * | * |  |
| 27954493 | Rong (2008)                        | General analysis and recommendations on China's legal implementation mechanism for wetland biodiversity conservation                                              | 2008 | * |   |   |   |  |   |   |  |
| 27939969 | Ross (2009)                        | Co-management and Indigenous protected areas in Australia: achievements and ways forward.                                                                         | 2009 |   | * |   | * |  | * | * |  |
| 33026362 | Rouget (2006)                      | Designing large-scale conservation corridors for pattern and process                                                                                              | 2006 |   | * |   |   |  | * | * |  |
| 27932116 | Roux (2016)                        | Top-down conservation targets and bottom-up management action: creating complementary feedbacks for freshwater conservation                                       | 2016 |   |   |   | * |  | * |   |  |

|          |                         |                                                                                                                                                                      |      |   |   |   |   |   |   |   |  |
|----------|-------------------------|----------------------------------------------------------------------------------------------------------------------------------------------------------------------|------|---|---|---|---|---|---|---|--|
| 27930973 | Rovero (2005)           | Diversity and abundance of diurnal primates and forest antelopes in relation to habitat quality: A case study from the Udzungwa mountains of Tanzania                | 2005 |   |   |   | * |   | * |   |  |
| 33026354 | Rufendi (2005)          | WWF project technical progress report: Pristine forest cover establishment in Bukit Tigapuluh – Bukit Rimang Baling Forest Corridor within district spatial planning | 2005 |   | * |   | * |   | * | * |  |
| 28366752 | Runsten (2013)          | Using spatial information to support decisions on safeguards and multiple benefits for REDD+ in Tanzania                                                             | 2013 |   | * |   | * |   | * | * |  |
| 27971087 | Russman (2004)          | Long-term impacts of payment for environmental services : a forest conservation assessment in the Osa peninsula, Costa Rica                                          | 2004 |   |   |   | * |   | * |   |  |
| 27927555 | Saenz (2005)            | Development by Design in Colombia: Making Mitigation Decisions Consistent with Conservation Outcomes                                                                 | 2005 |   | * |   |   |   |   | * |  |
| 33026232 | Salašová (2007)         | Landscape Planning in the Czech Republic – Opportunities, Visions, and Limits                                                                                        | 2007 |   | * |   | * |   | * | * |  |
| 33026326 | Salvatori (2002)        | The development of an ecological network in the Carpathian Ecoregion: identification of special areas for conservation of large carnivores                           | 2002 |   | * |   | * |   | * | * |  |
| 27931142 | Samson (2003)           | Planning for population viability on Northern Great Plains national grasslands                                                                                       | 2003 |   | * |   | * | * | * | * |  |
| 27936524 | Sánchez-Azofeifa (2009) | Land cover and conservation in the area of influence of the Chamela-Cuixmala Biosphere Reserve, Mexico                                                               | 2009 |   |   |   | * |   | * |   |  |
| 33026350 | Sanderson (2002)        | The human footprint and the last of the wild                                                                                                                         | 2002 |   | * | * | * |   | * | * |  |
| 27935535 | Saunders (2011)         | It's like herding monkeys into a conservation enclosure: The formation and establishment of the Jozani-Chwaka Bay National Park, Zanzibar, Tanzania                  | 2011 |   | * |   | * |   | * | * |  |
| 33026352 | Sawathvong (2004)       | Experiences from developing an integrated land-use planning approach for protected areas in the Lao PDR                                                              | 2004 |   | * |   | * |   | * | * |  |
| 27952074 | Schmitt (1989)          | Xerothermic vegetation along the lower reaches of the Moselle ...                                                                                                    | 1989 | * |   |   |   |   |   |   |  |
| 33026339 | Schoen (2007)           | The Coastal Forests and Mountains Ecoregion of Southeastern Alaska and the Tongass National Forest                                                                   | 2007 |   | * |   | * | * | * | * |  |
| 27940280 | Schroeder (2008)        | Comprehensive conservation planning and ecological sustainability within the United States National Wildlife Refuge System.                                          | 2008 |   | * |   | * |   | * | * |  |
| 27930503 | Schulman (2007)         | Amazonian biodiversity and protected areas: Do they meet?                                                                                                            | 2007 |   | * |   | * | * | * | * |  |
| 27939924 | Sciara (2011)           | The Pelagos Sanctuary for the conservation of Mediterranean marine mammals: an iconic High Seas MPA in dire straits                                                  | 2011 |   | * |   | * |   | * | * |  |
| 27926958 | Sciberras (2015)        | Evaluating the relative conservation value of fully and partially protected marine areas                                                                             | 2015 |   |   | * | * |   | * |   |  |
| 27937870 | Scott (2005)            | Climate change and protected area policy and planning in Canada                                                                                                      | 2005 |   | * |   | * |   | * | * |  |
| 27951798 | Scott (2006)            | Gap analysis: a spatial tool for conservation planning                                                                                                               | 2006 |   | * | * | * |   | * | * |  |

|          |                    |                                                                                                                                                                      |      |   |   |   |   |   |   |   |  |
|----------|--------------------|----------------------------------------------------------------------------------------------------------------------------------------------------------------------|------|---|---|---|---|---|---|---|--|
| 27929624 | Seddon (2010)      | Linking site and regional scales of biodiversity assessment for delivery of conservation incentive payments                                                          | 2010 |   | * |   | * | * | * | * |  |
| 27930407 | Sedlock (2008)     | Bat diversity in tropical forest and agro-pastoral habitats within a protected area in the Philippines                                                               | 2008 |   | * |   | * |   | * | * |  |
| 27936392 | Selman (2009)      | Conservation designations-Are they fit for purpose in the 21st century?                                                                                              | 2009 |   | * |   | * |   | * | * |  |
| 33026344 | Senes (1998)       | Sustainable land use planning in protected rural areas in Italy                                                                                                      | 1998 |   | * |   | * |   | * | * |  |
| 27930806 | Seoane (2006)      | Habitat-suitability modelling to assess the effects of land-use changes on Dupont's lark <i>Chersophilus duponti</i> : A case study in the Layna Important Bird Area | 2006 |   | * |   | * | * | * | * |  |
| 27931247 | Sessions (2003)    | Structure-based management for the state of Oregon: An application of combinatorial optimization heuristics for large-scale landscape analysis                       | 2003 |   | * | * | * |   | * | * |  |
| 27951701 | Sewall (2011)      | Reorienting systematic conservation assessment for effective conservation planning                                                                                   | 2011 |   | * |   | * | * | * | * |  |
| 27936814 | Shafer (2008)      | Terrestrial nature reserve design at the urban/rural interface                                                                                                       | 2008 |   | * | * | * |   | * | * |  |
| 27927028 | Shears (2015)      | Marine reserves in New Zealand: ecological responses to protection and network design                                                                                | 2015 |   | * |   | * |   | * | * |  |
| 27927548 | Shelmerdine (2014) | Implications of defining fisheries closed areas based on predicted habitats in Shetland: A proactive and precautionary approach                                      | 2014 |   | * |   | * |   | * | * |  |
| 27951852 | Shenk (1998)       | Conservation assessment and preliminary conservation strategy for Preble's meadow jumping mouse ( <i>Zapus hudsonius preblei</i> )                                   | 1998 | * |   |   |   |   |   |   |  |
| 27954503 | Shigley (2006)     | Twelve years and two billion bucks                                                                                                                                   | 2006 |   | * |   | * |   | * | * |  |
| 27936031 | Shigley (2010)     | A law evolves                                                                                                                                                        | 2010 |   | * |   | * |   | * | * |  |
| 27930678 | Siciliano (2007)   | Using high resolution multispectral imaging to map Pacific coral reefs in support of UNESCO's World Heritage Central Pacific Project - art. no. 67490B               | 2007 | * |   |   |   |   |   |   |  |
| 27931571 | Siegfried (1998)   | Regional assessment and conservation implications of landscape characteristics of African national parks                                                             | 1998 |   | * |   | * |   | * | * |  |
| 27938394 | Sierra (2002)      | Assessing biodiversity conservation priorities: Ecosystem risk and representativeness in continental Ecuador                                                         | 2002 |   | * |   | * |   | * | * |  |
| 27951662 | Singh (1996)       | Biodiversity Conservation Plan for GIR: A Management Plan for Gir Sanctuary & National Park                                                                          | 1996 | * |   |   |   |   |   |   |  |
| 33026229 | Sink (2007)        | Guidelines for the establishment of an offshore marine protected area for South Africa                                                                               | 2007 |   | * |   | * |   | * | * |  |
| 27954510 | Slown (2003)       | Taking refuge                                                                                                                                                        | 2003 |   | * | * | * |   | * | * |  |
| 27951108 | Smith (1997)       | Deforestation, fragmentation, and reserve design in western Madagascar                                                                                               | 1997 |   | * |   | * |   | * | * |  |
| 27940529 | Smith (2005)       | Habitat conservation plan implementation: keeping promises for adaptive management within a "no surprises" policy                                                    | 2005 |   | * |   | * |   | * | * |  |

|          |                                  |                                                                                                                                                           |      |   |   |   |   |   |   |   |  |
|----------|----------------------------------|-----------------------------------------------------------------------------------------------------------------------------------------------------------|------|---|---|---|---|---|---|---|--|
| 27930725 | Smith (2006)                     | Systematic conservation planning: a review of perceived limitations and an illustration of the benefits, using a case study from Maputaland, South Africa | 2006 |   | * |   |   |   |   | * |  |
| 33026233 | Smith (2006)                     | Transnational conservation planning in the Maputaland ecoregion of southern Africa. Darwin Initiative for the Survival of Species Annual Report           | 2004 |   | * |   |   |   |   | * |  |
| 27951907 | Smith (2006)                     | The maputaland conservation planning system and conservation assessment                                                                                   | 2006 |   | * |   | * | * | * | * |  |
| 27930284 | Smith (2008)                     | Designing a transfrontier conservation landscape for the Maputaland centre of endemism using biodiversity, economic and threat data                       | 2008 |   | * |   | * | * | * | * |  |
| 33026129 | South Africa: Integrating...     | South Africa: Integrating strategic conservation planning with environmental impact assessment in the Western Cape: a report card                         |      |   | * | * | * |   | * | * |  |
| 27930846 | Soutullo (2006)                  | How effective is the MERCOSUR's network of protected areas in representing South America's ecoregions?                                                    | 2006 |   | * |   | * |   | * | * |  |
| 27955247 | Spatial Analysis in... (Lambert) | Spatial Analysis in Support of Conservation Planning on the Altamaha River Bioserve in Georgia                                                            | 1995 | * |   |   |   |   |   |   |  |
| 27939962 | Special Issue: Freshwater...     | Special Issue: Freshwater conservation planning.                                                                                                          | 2011 |   | * |   | * |   | * | * |  |
| 27933606 | Spence (2015)                    | The escalante river watershed partnership: Conservation of an endangered riparian ecosystem                                                               | 2015 |   | * |   | * |   | * | * |  |
| 27929183 | Squeo (2012)                     | Towards the creation of an integrated system of protected areas in Chile: achievements and challenges                                                     | 2012 |   | * |   | * | * | * | * |  |
| 27930006 | Stamieszkin (2009)               | Management of a marine protected area for sustainability and conflict resolution: Lessons from Loreto Bay National Park (Baja California Sur, Mexico)     | 2009 |   | * |   | * |   | * | * |  |
| 27954445 | Stanton (2014)                   | One for the Little Guy: The Pygmy Owl and the Sonoran Desert Conservation Plan                                                                            | 2014 |   | * | * | * |   | * | * |  |
| 27928768 | Staszak (2013)                   | Evaluating Salt Marsh Restoration Success with an Index of Ecosystem Integrity                                                                            | 2013 |   |   |   | * |   | * |   |  |
| 27951452 | Steering (2005)                  | Gunnison sage-grouse rangewide conservation plan                                                                                                          | 2005 |   | * |   | * |   | * | * |  |
| 27931854 | Stelzenmüller (2001)             | Co-location of passive gear fisheries in offshore wind farms in the German EEZ of the North Sea: A first socio-economic scoping                           | 2001 |   | * |   | * |   | * | * |  |
| 33026324 | Stelzenmüller (2009)             | Patterns of species and functional diversity around a coastal marine reserve : a fisheries perspective                                                    | 2009 |   |   |   | * |   | * | * |  |
| 27929816 | Stephenson (2010)                | Conservation planning for a widespread, threatened species: WWF and the African elephant <i>Loxodonta africana</i>                                        | 2010 |   | * |   | * |   | * | * |  |
| 27931642 | Stevens (1996)                   | Utility participation in a multispecies plan                                                                                                              | 1996 |   | * |   | * |   | * | * |  |
| 27934640 | Stevens (2013)                   | Evaluating marine protected areas for managing marine resource conflict in Hawaii                                                                         | 2013 |   |   |   | * |   | * |   |  |

|          |                                    |                                                                                                                                                            |      |   |   |   |   |   |   |   |  |  |
|----------|------------------------------------|------------------------------------------------------------------------------------------------------------------------------------------------------------|------|---|---|---|---|---|---|---|--|--|
| 27951988 | Stine (1994)                       | Conservation planning for the coastal sage scrub natural community: GIS application of a biospatial evaluation process                                     | 1994 | * |   |   |   |   |   |   |  |  |
| 27936090 | Stoll-Kleeman (2010)               | The role of community participation in the effectiveness of UNESCO Biosphere Reserve management: Evidence and reflections from two parallel global surveys | 2010 |   |   | * | * |   | * |   |  |  |
| 27940734 | Stolton (1999)                     | Partnerships for protection: new strategies for planning and management for protected areas.                                                               | 1999 |   | * | * | * |   | * | * |  |  |
| 27937569 | Strager (2007)                     | Aggregating high-priority landscape areas to the parcel level: An easement implementation tool                                                             | 2007 |   | * |   | * | * | * | * |  |  |
| 27931680 | Strittholt (1995)                  | Applying biodiversity gap analysis in a regional nature reserve design for the Edge of Appalachia, Ohio (USA)                                              | 1995 |   | * |   | * |   | * | * |  |  |
| 27939196 | Sui (2015)                         | Assessment of temporal and spatial landscape and avifauna changes in the Yellow River wetland natural reserves in 1990-2013, China.                        | 2015 |   | * |   | * |   | * | * |  |  |
| 33026237 | Summary of conservation... (Spark) | Summary of conservation assessment of travelling stock reserves and routes of the eastern half of the Lachlan Catchment                                    |      |   | * |   | * |   | * | * |  |  |
| 27951722 | Supriatna (2001)                   | Conservation assessment and management plan for the primates of Indonesia                                                                                  | 2001 | * |   |   |   |   |   |   |  |  |
| 27926832 | Sutcliffe (2015)                   | The effectiveness of marine reserve systems constructed using different surrogates of biodiversity                                                         | 2015 |   | * |   | * | * | * | * |  |  |
| 27930345 | Suzuki (2008)                      | Options for biodiversity conservation in managed forest landscapes of multiple ownerships in Oregon and Washington, USA                                    | 2008 |   | * |   | * |   | * | * |  |  |
| 27994139 | Swain (2014)                       | Saving the Florida Scrub Ecosystem: Translating Science Into Conservation Action                                                                           | 2014 |   |   |   | * |   | * | * |  |  |
| 27955183 | SWAT: An Environmental... (Arnold) | SWAT: An Environmental and Conservation Assessment Watershed Model                                                                                         | 2006 | * |   |   |   |   |   |   |  |  |
| 27933970 | Swensen (2014)                     | Managing historic resources in active farming landscapes: National priorities and local practices                                                          | 2014 | * |   |   |   |   |   |   |  |  |
| 27928947 | Syakur (2012)                      | Ensuring local stakeholder support for marine conservation: establishing a locally-managed marine area network in Aceh                                     | 2012 |   | * |   |   |   |   | * |  |  |
| 27936455 | Syme (2009)                        | Integrating research, modelling and decision making: A network and knowledge processing approach for sustainable management of a coral reef                | 2009 |   | * |   | * |   | * | * |  |  |
| 33026236 | Tabunakawai (2004)                 | Ecoregion planning and conservation in Fiji for a sustainable ocean (from planning to mobilization into action)                                            | 2004 |   | * |   |   |   | * | * |  |  |
| 27932217 | Taggart-Hodge (2016)               | The challenges and opportunities of transboundary cooperation through the lens of the East Carpathians Biosphere Reserve                                   | 2016 |   | * |   | * |   | * | * |  |  |
| 27932060 | Tancell (2016)                     | Marine spatial planning for the conservation of albatrosses and large petrels breeding at South Georgia                                                    | 2016 |   | * |   | * |   | * | * |  |  |

|          |                                             |                                                                                                                                                                     |      |   |   |  |   |   |   |   |  |
|----------|---------------------------------------------|---------------------------------------------------------------------------------------------------------------------------------------------------------------------|------|---|---|--|---|---|---|---|--|
| 27935731 | Tang (2011)                                 | Landscape-level forest ecosystem conservation on Changbai Mountain, China and North Korea (DPRK)                                                                    | 2011 |   | * |  | * |   | * | * |  |
| 27969893 | Taranto (1997)                              | Torres Strait bibliography for conservation planning                                                                                                                | 1997 | * |   |  |   |   |   |   |  |
| 33026241 | Tarasova (2009)                             | Systematic conservation planning in Ukraine under uncertainty                                                                                                       | 2009 |   | * |  | * | * | * | * |  |
| 27951928 | Tarlock (2001)                              | Fred Bosselman as Participant-Observer Lawyer: The Case of Habitat Conservation Planning                                                                            | 2001 |   | * |  | * |   | * | * |  |
| 27929511 | Tattoni (2011)                              | The Fate of Priority Areas for Conservation in Protected Areas: A Fine-Scale Markov Chain Approach                                                                  | 2011 |   | * |  | * |   | * | * |  |
| 27951663 | Taylor (1994)                               | Local distribution patterns of land snails in relation to vegetation: implications for reserve design                                                               | 1994 | * |   |  |   |   |   |   |  |
| 27927350 | Tear (2014)                                 | A return-on-investment framework to identify conservation priorities in Africa                                                                                      | 2014 |   | * |  | * |   | * | * |  |
| 27936400 | Tejeda-Cruz (2009)                          | Biodiversity conservation and local communities: Conflicts in protected natural areas in the Lacandona Forest, Chiapas, Mexico                                      | 2009 | * |   |  |   |   |   |   |  |
| 33026316 | Tentative experiment... (Delavene)          | Tentative experiment of systematic conservation planning in the Eastern English Channel Introduction- The Eastern English Channel                                   |      |   | * |  | * | * | * | * |  |
| 33026218 | The (2005)                                  | Executive report: Blackbird-Millington Corridor conservation area plan                                                                                              | 2005 |   | * |  | * |   | * | * |  |
| 28366805 | The Alps ecoregion conservation... (Author) | The Alps ecoregion conservation plan                                                                                                                                |      |   | * |  | * | * | * | * |  |
| 27955282 | The Bonelli's Eagle... (Parellada)          | The Bonelli's Eagle (Hieraaetus fasciatus) in Catalonia (NE of Spain): status and conservation plan                                                                 | 1996 | * |   |  |   |   |   |   |  |
| 33026294 | The Desert Bird Conservation... (Habitats)  | The Desert Bird Conservation Plan                                                                                                                                   |      |   | * |  | * |   | * | * |  |
| 27955214 | The ecological knowledge... (Ferrari)       | The ecological knowledge base for Italian wetlands: towards the definition of a national conservation plan                                                          | 2004 | * |   |  |   |   |   |   |  |
| 27955291 | The good news and the... (Pressey)          | The good news and the bad news for conservation planning: procedures for reserve selection are improving but we still don't know enough about birds and other fauna | 1993 | * |   |  |   |   |   |   |  |
| 27955279 | The Illinois River-floodplain... (Olmstead) | The Illinois River-floodplain ecosystem: Conservation planning on a watershed-scale                                                                                 | 1996 |   | * |  |   |   | * | * |  |

|          |                                          |                                                                                                                                                                       |      |   |   |   |   |   |   |   |  |
|----------|------------------------------------------|-----------------------------------------------------------------------------------------------------------------------------------------------------------------------|------|---|---|---|---|---|---|---|--|
| 27955212 | The Importance of Biological... (Esque)  | The Importance of Biological Research in the Habitat Conservation Planning Process                                                                                    | 1997 | * |   |   |   |   |   |   |  |
| 33026259 | The Nebraska Natural.. (Schneider)       | The Nebraska Natural Legacy Project                                                                                                                                   | 2005 |   | * |   |   | * | * | * |  |
| 27955221 | The Pattern and Conservation... (Gaynor) | The Pattern and Conservation Value of Remnant Vegetation in the Inner Melbourne: A Skeleton for Integrated Conservation Planning in an Urban Landscape                | 1994 | * |   |   |   |   |   |   |  |
| 27955241 | THE YAKAM A INDIAN NATION ... (King)     | THE YAKAMA INDIAN NATION HABITAT CONSERVATION PLAN (SECTION 7 OR SECTION 10?)                                                                                         |      | * |   |   |   |   |   |   |  |
| 27951057 | Thieme (2005)                            | Setting priorities for biodiversity conservation among Africa's freshwater ecoregions                                                                                 | 2005 |   | * |   | * |   | * | * |  |
| 27929541 | Thompson (2011)                          | Planning for Implementation: Landscape-Level Restoration Planning in an Agricultural Setting                                                                          | 2011 |   | * |   | * | * | * | * |  |
| 33026244 | Thorne (2009)                            | Integration of regional mitigation assessment and conservation planning                                                                                               | 2009 |   | * |   | * | * | * | * |  |
| 27951676 | Thorton (1991)                           | Searching for Consensus and Predictability: Habitat conservation planning under the Endangered Species Act of 1973                                                    | 1991 |   | * | * | * |   | * | * |  |
| 27935761 | Thuy (2011)                              | Role of social capital in determining conservation attitude: A case study from Cat Tien National Park, Vietnam                                                        | 2011 |   |   |   | * |   | * |   |  |
| 33026219 | Tiemann (2009)                           | Ecological networks implemented by participatory approaches as a response to landscape fragmentation: A review of German literature                                   | 2009 |   | * |   | * |   | * | * |  |
| 27937394 | Tien (2007)                              | The importance of protected areas for the forest and endemic avifauna of Sulawesi (Indonesia)                                                                         | 2007 |   |   |   | * |   | * |   |  |
| 27933561 | Timmermann (2015)                        | Pervasive early 21st-century vegetation changes across Danish semi-natural ecosystems: More losers than winners and a shift towards competitive, tall-growing species | 2015 |   |   |   | * |   | * |   |  |
| 33026239 | TNC (2004)                               | A Biodiversity and Conservation Assessment of the Edwards Plateau Ecoregion                                                                                           | 2004 |   | * |   | * |   | * | * |  |
| 27931883 | Todd (2016)                              | Assessing reserve effectiveness: Application to a threatened species in a dynamic fire prone forest landscape                                                         | 2016 |   | * |   | * |   | * | * |  |
| 33026267 | Toledo (2008)                            | May Mountain Marine Corridor conservation action strategy: Final draft                                                                                                | 2008 |   | * |   | * |   | * | * |  |
| 27932469 | Tonielli (2016)                          | Distribution of Posidonia oceanica (L.) Delile meadows around Lampedusa Island (Strait of Sicily, Italy)                                                              | 2016 |   | * |   | * |   | * |   |  |



|          |                                          |                                                                                                                                                  |      |   |   |  |   |   |   |   |  |
|----------|------------------------------------------|--------------------------------------------------------------------------------------------------------------------------------------------------|------|---|---|--|---|---|---|---|--|
| 27938493 | Torres (2001)                            | Turning scientific approaches into practical conservation actions: The case of Comunidad Indigena de Nuevo San Juan Parangaricutiro, Mexico      | 2001 |   | * |  | * | * | * | * |  |
| 27955319 | Towards an international... (Stroud)     | Towards an international conservation plan for Greenland White-fronted Geese Anser albifrons flavirostris                                        | 1994 | * |   |  |   |   |   |   |  |
| 33026217 | TRI-NATIONAL SEA TURTLE ... (Highlights) | TRI-NATIONAL SEA TURTLE CORRIDOR                                                                                                                 |      |   | * |  | * |   | * | * |  |
| 27929892 | Trombulak (2010)                         | Introduction: Creating a Context for Landscape-Scale Conservation Planning                                                                       | 2010 | * |   |  |   |   |   |   |  |
| 27927517 | Troupin (2014)                           | Can agro-ecosystems efficiently complement protected area networks?                                                                              | 2014 |   | * |  | * | * | * | * |  |
| 27951692 | Trustrum (1996)                          | Pohnpei's watershed spatial plan and management guidelines                                                                                       | 1996 | * |   |  |   |   |   |   |  |
| 27930057 | Tsiftsis (2009)                          | Identifying areas of high importance for orchid conservation in east Macedonia (NE Greece)                                                       | 2009 |   | * |  | * | * | * | * |  |
| 27939963 | Turak (2011)                             | Freshwater conservation planning: an introduction.                                                                                               | 2011 |   | * |  | * |   | * | * |  |
| 27938280 | Turnbull (2003)                          | South Pacific agendas in the quest to protect natural areas                                                                                      | 2003 |   | * |  | * |   | * | * |  |
| 33026216 | Turner (2009)                            | Grenada Protected Area System Plan                                                                                                               | 2009 |   | * |  | * |   | * | * |  |
| 33026206 | Unami Creek Valleys.. (Creek)            | Unami Creek Valleys Landscape Conservation Plan                                                                                                  | 2001 |   | * |  | * |   | * | * |  |
| 27929565 | Underwood (2011)                         | Combining Landscape-Level Conservation Planning and Biodiversity Offset Programs: A Case Study                                                   | 2011 |   |   |  | * |   |   |   |  |
| 27970908 | United (2012)                            | Wechiau community hippo sanctuary, Ghana. Equator Initiative Case Study                                                                          | 2012 |   |   |  | * |   | * |   |  |
| 27951950 | Unlimited (2001)                         | Ducks Unlimited's Conservation Plan                                                                                                              | 2001 |   | * |  | * |   | * | * |  |
| 27932554 | Urbina-Casanova (2016)                   | Assessing floristic representativeness in the protected areas national system of Chile: Are vegetation types a good surrogate for plant species? | 2016 |   | * |  | * |   | * | * |  |
| 27934746 | Urech (2013)                             | Challenges for community-based forest management in the Koloala site Manompana                                                                   | 2013 |   | * |  | * |   | * | * |  |
| 28981790 | USAID (1989)                             | Project assistance completion report : project title, St. Kitts/Nevis resource management project                                                | 1989 | * |   |  |   |   |   |   |  |
| 27932303 | Van Cuong (2017)                         | Biosphere reserves: Attributes for success                                                                                                       | 2017 |   |   |  | * |   | * |   |  |
| 27938444 | Van Dam (2001)                           | Ecological quality objectives for the Dutch sector of the North Sea, an outline of a policy under development                                    | 2001 |   | * |  | * |   | * | * |  |
| 27962544 | van Heist (2015)                         | Exploring Local Perspectives for Conservation Planning: A Case Study from a Remote Forest Community in Indonesian Papua                          | 2015 |   | * |  | * |   | * | * |  |
| 27928973 | Van Teeffelen (2012)                     | Species in a dynamic world: Consequences of habitat network dynamics on conservation planning                                                    | 2012 |   | * |  | * |   | * | * |  |

|          |                   |                                                                                                                                                                                                                                                                 |      |   |   |  |   |   |   |   |  |
|----------|-------------------|-----------------------------------------------------------------------------------------------------------------------------------------------------------------------------------------------------------------------------------------------------------------|------|---|---|--|---|---|---|---|--|
| 27932402 | Van Vleet (2016)  | Knowing but not knowing: Systematic conservation planning and community conservation in the Sierra Norte of Oaxaca, Mexico                                                                                                                                      | 2016 |   | * |  | * | * | * | * |  |
| 27932556 | van Wilgen (2016) | Ecological research and conservation management in the Cape Floristic Region between 1945 and 2015: History, current understanding and future challenges                                                                                                        | 2016 |   | * |  |   |   |   | * |  |
| 27930113 | Vazquez (2009)    | How well represented are Mexican mammals in the natural protected area network?                                                                                                                                                                                 | 2009 | * |   |  |   |   |   |   |  |
| 27929527 | Veidema ne (2011) | The Impact of Driving Forces and Protection Policies on Future Coastal Landscapes: A Case Study of Latvia                                                                                                                                                       | 2011 | * |   |  |   |   |   |   |  |
| 27935975 | Velasco (2010)    | Adequacy of the network of protected areas in Asturias (Spain) for butterflies and application of the complementarity principle in the selection of priority areas (Lepidoptera: Papilionoidea and Hesperioidea)                                                | 2010 | * |   |  |   |   |   |   |  |
| 33026357 | Velázquez (2009)  | Building participatory landscape-based conservation alternatives: A case study of Michoacán, Mexico                                                                                                                                                             | 2009 |   | * |  | * |   | * | * |  |
| 27929773 | Vellak (2010)     | Vascular plant and bryophytes species representation in the protected areas network on the national scale                                                                                                                                                       | 2010 |   | * |  | * |   | * | * |  |
| 27954461 | Venner (2013)     | Getting Out Front on Wetland Conservation Planning                                                                                                                                                                                                              | 2013 | * |   |  |   |   |   |   |  |
| 27951468 | Venter (2013)     | Using systematic conservation planning to minimize REDD+ conflict with agriculture and logging in the tropics                                                                                                                                                   | 2013 |   | * |  | * |   | * | * |  |
| 27951535 | Venture (2004)    | The riparian bird conservation plan: A strategy for reversing the decline of riparian associated birds in California                                                                                                                                            | 2004 |   | * |  |   |   | * | * |  |
| 27954514 | Viguerie (2000)   | Coast 2050: a master plan for Louisiana's wetlands                                                                                                                                                                                                              | 2000 | * |   |  |   |   |   |   |  |
| 27936032 | Von Hase (2010)   | Evaluating private land conservation in the cape lowlands, South Africa                                                                                                                                                                                         | 2010 |   | * |  |   |   |   | * |  |
| 27937377 | Vora (2007)       | A six-step approach for identifying and prioritizing potential research natural areas, Superior National Forest, Minnesota                                                                                                                                      | 2007 |   | * |  | * |   | * | * |  |
| 27927536 | Vrdoljak (2014)   | Agricultural mosaics maintain significant flower and visiting insect biodiversity in a global hotspot                                                                                                                                                           | 2014 |   |   |  | * |   | * |   |  |
| 27954485 | Waage (2010)      | Performing Expertise: Landscape, Governmentality and Conservation Planning in Iceland                                                                                                                                                                           | 2010 |   | * |  | * |   | * | * |  |
| 27932347 | Waeber (2017)     | Local awareness and perceptions: consequences for conservation of marsh habitat at Lake Alaotra for one of the world's rarest lemurs                                                                                                                            | 2017 |   |   |  | * |   | * | * |  |
| 33026205 | Walker (2004)     | Effects of regional-scale conservation planning at the local level : Chachi ( Cayapa ) and Afro-Ecuadorian communities ' utilization of the endangered coastal forests of the Ecuadorian Chocó and their understanding of sustainable development and biodivers | 2004 |   | * |  | * |   | * | * |  |
| 27930366 | Wallace (2008)    | Assessing the ecological and social benefits of private land conservation in Colorado                                                                                                                                                                           | 2008 |   |   |  | * |   | * | * |  |
| 27931977 | Wallace (2016)    | Managing human disturbance of wildlife in coastal areas                                                                                                                                                                                                         | 2016 |   | * |  | * |   | * | * |  |

|          |                                    |                                                                                                                                                                                                    |      |   |   |   |   |   |   |   |  |
|----------|------------------------------------|----------------------------------------------------------------------------------------------------------------------------------------------------------------------------------------------------|------|---|---|---|---|---|---|---|--|
| 27954452 | Walsh (2014)                       | Rethinking the Spatiality of Spatial Planning: Methodological Territorialism and Metageographies                                                                                                   | 2014 |   | * | * | * |   | * | * |  |
| 27951984 | Walters (2005)                     | Evaluation of red-cockaded woodpecker demographics and conservation planning on Plum Creek lands through simulation modeling                                                                       | 2005 | * |   |   |   |   |   |   |  |
| 27930760 | Wang (2006)                        | Farmer attitudes towards conservation in Jigme Singye Wangchuck National Park, Bhutan                                                                                                              | 2006 |   |   |   | * |   | * |   |  |
| 27930005 | Wang (2009)                        | Integrating population size analysis into habitat suitability assessment: implications for giant panda conservation in the Minshan Mountains, China                                                | 2009 |   | * |   | * |   | * | * |  |
| 27933622 | Wang (2015)                        | Conserving Pacific Lamprey through Collaborative Efforts                                                                                                                                           | 2015 |   | * |   | * |   | * | * |  |
| 33026207 | Warman (2000)                      | A systematic method for identifying priority conservation areas using wildlife habitat relationships and observed locations of rare species                                                        | 2000 |   | * |   | * | * | * | * |  |
| 27951494 | Watchman (2001)                    | Science and Uncertainty in Habitat Conservation Planning                                                                                                                                           | 2001 |   |   |   | * |   | * | * |  |
| 27955230 | Watershed Analysis and... (Harris) | Watershed Analysis and Conservation Planning for Riparian Vegetation                                                                                                                               | 1995 | * |   |   |   |   |   |   |  |
| 27932338 | Watson (2017)                      | Monitoring ecological consequences of efforts to restore landscape-scale connectivity                                                                                                              | 2017 |   | * |   | * |   | * | * |  |
| 27930442 | Watts (2008)                       | Conserving Forest Biodiversity: Recent Approaches in UK Forest Planning and Management                                                                                                             | 2008 |   | * |   | * | * | * | * |  |
| 27937683 | Weber (2006)                       | Maryland's Green Infrastructure Assessment: Development of a comprehensive approach to land conservation                                                                                           | 2006 |   | * |   | * |   | * | * |  |
| 27927404 | Weeks (2004)                       | Developing Marine Protected Area Networks in the Coral Triangle: Good Practices for Expanding the Coral Triangle Marine Protected Area System                                                      | 2004 |   | * |   |   |   |   | * |  |
| 27928494 | Weeks (2013)                       | Adaptive Comanagement of a Marine Protected Area Network in Fiji                                                                                                                                   | 2013 |   | * |   | * | * |   | * |  |
| 27936772 | Wegge (2009)                       | Predator-prey relationships and responses of ungulates and their predators to the establishment of protected areas: A case study of tigers, leopards and their prey in Bardia National Park, Nepal | 2009 |   |   |   | * |   | * |   |  |
| 27951460 | Weiss (1993)                       | Climatic considerations in reserve design and ecological restoration                                                                                                                               | 1993 | * |   |   |   |   |   |   |  |
| 27954522 | Welner (1995)                      | Natural communities conservation planning: an ecosystem approach to protecting endangered species                                                                                                  | 1995 |   | * | * | * |   | * | * |  |
| 27952049 | Wencel (2000)                      | Actions in favour of the common hamster in Alsace (France) : ...                                                                                                                                   | 2000 | * |   |   |   |   |   |   |  |
| 27938581 | Werner (2000)                      | Abrolhos 2000: Conserving the southern Atlantic's richest coastal biodiversity into the next century                                                                                               | 2000 |   | * |   | * |   | * | * |  |
| 27930214 | Wheeler (2008)                     | From beans to brems: how participatory workshops can contribute to marine conservation planning                                                                                                    | 2008 |   | * |   |   |   | * | * |  |
| 27955259 | When Biologists and... (McKinney)  | When Biologists and Engineers Collide: Habitat Conservation Planning in the Middle of Urbanized Development                                                                                        | 1996 |   | * |   | * |   | * | * |  |

|          |                                            |                                                                                                                                                                                             |      |   |   |  |   |   |   |   |   |
|----------|--------------------------------------------|---------------------------------------------------------------------------------------------------------------------------------------------------------------------------------------------|------|---|---|--|---|---|---|---|---|
| 27934137 | When is a marine protected d... (Johnso n) | When is a marine protected area network ecologically coherent? A case study from the North-east Atlantic                                                                                    |      |   | * |  | * | * | * | * |   |
| 33026131 | Where are we going?... ()                  | Where are we going? Fine scale systematic conservation plans and their contribution to environmental assessment                                                                             |      |   | * |  |   |   |   | * |   |
| 27927402 | White (2004)                               | Marine Protected Areas in the Coral Triangle: Progress, Issues, and Options                                                                                                                 | 2014 |   | * |  | * |   | * | * |   |
| 27931454 | Whiting (2000)                             | Biogeographic regionalization of Australia: assigning conservation priorities based on endemic freshwater crayfish phylogenetics                                                            | 2000 |   | * |  | * |   | * | * |   |
| 27951287 | Wiersma (2009)                             | Efficiency and effectiveness in representative reserve design in Canada: the contribution of existing protected areas                                                                       | 2009 |   | * |  | * | * | * | * |   |
| 27932672 | Wiersma (2016)                             | A review of applications of the six-step method of systematic conservation planning                                                                                                         | 2016 |   |   |  |   |   |   |   | * |
| 27936719 | Wikberg (2009)                             | Cost-effectiveness of conservation strategies implemented in boreal forests: The area selection process                                                                                     | 2009 |   |   |  | * |   | * |   |   |
| 27950994 | Wikramanayake (2002)                       | Terrestrial ecoregions of the Indo-Pacific: a conservation assessment                                                                                                                       | 2002 |   | * |  | * |   | * | * |   |
| 27930641 | Wilson (2007)                              | Identification of Priority Areas for Conservation in South-central Chile                                                                                                                    | 2007 |   | * |  | * | * | * | * |   |
| 27929696 | Wilson (2010)                              | Conserving biodiversity in production landscapes                                                                                                                                            | 2010 |   | * |  | * | * | * | * |   |
| 27927366 | Wise (2014)                                | Learning through experience: Non-implementation and the challenges of protected area conservation in The Bahamas                                                                            | 2014 |   |   |  | * |   | * | * |   |
| 27926843 | Wright (2015)                              | Genetic isolation by distance reveals restricted dispersal across a range of life histories: implications for biodiversity conservation planning across highly variable marine environments | 2015 |   | * |  | * |   | * | * |   |
| 33026251 | Wsc (2008)                                 | Oregon North Coast Salmon Conservation Assessment                                                                                                                                           | 2008 |   | * |  | * |   | * | * |   |
| 27929407 | Wu (2011)                                  | The performance of nature reserves in capturing the biological diversity on Hainan Island, China                                                                                            | 2011 |   | * |  | * |   | * | * |   |
| 28366812 | WWF Baltic Ecoregion... (Author)           | WWF Baltic Ecoregion conservation plan                                                                                                                                                      |      |   | * |  | * | * | * | * |   |
| 33026334 | WWF-and-Nature-Conservancy (2004)          | Bering Sea Ecoregion Strategic Action Plan Part I                                                                                                                                           | 2005 |   | * |  | * |   | * | * |   |
| 27935575 | Xiao (2011)                                | Nature reserve group planning for conservation of giant pandas in North Minshan, China                                                                                                      | 2011 |   | * |  | * | * | * | * |   |
| 27935892 | Xiaofeng (2011)                            | Habitat evaluation of wild Amur tiger (Panthera tigris altaica) and conservation priority setting in north-eastern China                                                                    | 2011 |   | * |  | * |   | * | * |   |
| 27935965 | Xu (2010)                                  | Designing regional nature reserves group: The case study of Qinling Mountain Range, China                                                                                                   | 2010 | * |   |  |   |   |   |   |   |
| 27932422 | Xu (2016)                                  | The effectiveness of the zoning of China's protected areas                                                                                                                                  | 2016 |   |   |  | * |   | * |   |   |

|          |                    |                                                                                                                        |      |   |   |  |   |   |   |   |  |
|----------|--------------------|------------------------------------------------------------------------------------------------------------------------|------|---|---|--|---|---|---|---|--|
| 27928628 | Yates (2016)       | Spatial Access Priority Mapping (SAPM) with Fishers: A Quantitative GIS Method for Participatory Planning              | 2016 |   | * |  | * |   | * | * |  |
| 27932353 | Ye (2017)          | Evaluation of ecological effectiveness of protected areas in Northwest China                                           | 2017 |   | * |  | * |   | * | * |  |
| 27951900 | Yonzon (2000)      | Kanchenjunga Mountain Complex: biodiversity assessment and conservation planning                                       | 2000 | * |   |  |   |   |   |   |  |
| 27938206 | Younge (2003)      | The Cape Action Plan for the Environment: Overview of an ecoregional planning process                                  | 2003 |   | * |  | * | * | * | * |  |
| 27928516 | Youngen tob (2013) | The response of arboreal marsupials to landscape context over time: a large-scale fragmentation study revisited        | 2013 |   |   |  | * |   | * |   |  |
| 27931675 | Zann (1996)        | The State of the Marine Environment Report for Australia (SOMER): Process, findings and perspectives                   | 1996 |   | * |  | * |   | * | * |  |
| 27969809 | Zerger (2009)      | Can regional-scale conservation planning influence farm-scale actions?                                                 | 2009 |   | * |  | * |   | * | * |  |
| 27936417 | Zerger (2009)      | Can regional-scale conservation planning influence farm-scale actions?                                                 | 2009 |   | * |  | * |   | * | * |  |
| 27935867 | Zerger (2011)      | Multi-criteria assessment for linking regional conservation planning and farm-scale actions                            | 2011 |   | * |  | * |   | * | * |  |
| 27951934 | Zeydanlı (2012)    | Identification of Prime Butterfly Areas in Turkey using systematic conservation planning: Challenges and opportunities | 2012 |   | * |  |   |   |   | * |  |
| 33026348 | Zhang (2006)       | Planning an ecological network of Xiamen Island (China) using landscape metrics and network analysis                   | 2006 |   | * |  | * |   | * | * |  |
| 27935789 | Zhang (2011)       | The impact of conservation projects on Giant Panda Habitat                                                             | 2011 | * |   |  |   |   |   |   |  |
| 27927260 | Zhang (2014)       | Determination of priority nature conservation areas and human disturbances in the Yangtze River Basin, China           | 2014 |   | * |  | * | * | * | * |  |
| 27926878 | Zhao (2015)        | Disturbance impacts of land use change on biodiversity conservation priority areas across China: 1990-2010             | 2015 |   |   |  | * |   | * |   |  |
| 27935425 | Zhelezov (2011)    | Sustainable development in mountain regions: Southeastern Europe                                                       | 2011 |   | * |  | * |   | * | * |  |
| 27952089 | Zheng (2007)       | Conservation Planning For Heritage Sites: A Critical Review and Case Studies                                           | 2007 | * |   |  |   |   |   |   |  |
| 27930684 | Zielinski (2006)   | Using landscape suitability models to reconcile conservation planning for two key forest predators                     | 2006 |   | * |  | * | * | * | * |  |
| 27951552 | Zippel (2006)      | CBSG/WAZA amphibian ex situ conservation planning workshop final report                                                | 2006 |   | * |  | * |   | * | * |  |

**Bibliographic searches of included studies - results of screening new studies at full-text and reasons for exclusion**

| Citation origin (B: backwards, F: forwards) | Citation (Authors, year, title)                                                                                                                    | Exclude on subject | Exclude on intervention | Intervention is similar to, but not SCP | Exclude on outcomes | Exclude on comparator | Exclude on study design | Exclude as a review article | Full text unavailable | Full-text not in English |
|---------------------------------------------|----------------------------------------------------------------------------------------------------------------------------------------------------|--------------------|-------------------------|-----------------------------------------|---------------------|-----------------------|-------------------------|-----------------------------|-----------------------|--------------------------|
| Álvarez-Romero et al., 2013 B               | Arriaga-Cabrera L, Vázquez-Domínguez E, González-Cano J, Jiménez-Rosenberg R, Muñoz-López E, Aguilar-Sierra V. 1998. Regiones marinas prioritarias |                    |                         |                                         |                     |                       |                         |                             |                       | *                        |

|                               |                                                                                                                                                                                                                                                    |   |   |   |   |   |   |   |   |   |
|-------------------------------|----------------------------------------------------------------------------------------------------------------------------------------------------------------------------------------------------------------------------------------------------|---|---|---|---|---|---|---|---|---|
|                               | de México                                                                                                                                                                                                                                          |   |   |   |   |   |   |   |   |   |
| Álvarez-Romero et al., 2013 B | Bezaury-Creel JE. 2005. Protected areas and coastal and ocean management in México                                                                                                                                                                 |   | * |   | * | * | * |   |   |   |
| Álvarez-Romero et al., 2013 B | Enríquez-Andrade R, Anaya-Reyna G, Barrera-Guevara JC, C-M MdlÁ, Martínez-Delgado ME, Vaca-Rodríguez J, Valdés-Casillas C. 2005. An analysis of critical areas for biodiversity conservation in the Gulf of California Region                      |   | * |   | * | * | * |   |   |   |
| Álvarez-Romero et al., 2013 B | Enríquez-Andrade R, Danemann G. 1998. Identificación y establecimiento de prioridades para las acciones de conservación y oportunidades de uso sustentable de los recursos marinos y costeros de la Península de Baja California.                  |   |   |   |   |   |   |   | * |   |
| Álvarez-Romero et al., 2013 B | Gilliland PM, Laffoley D. 2008. Key elements and steps in the process of developing ecosystem-based marine spatial planning                                                                                                                        | * | * |   | * | * | * |   |   |   |
| Álvarez-Romero et al., 2013 B | Gleason M, McCreary S, Miller-Henson M, Ugoretz J, Fox E, Merrifield M, McClintock W, Serpa P, Hoffman K. 2010. Science-based and stakeholder-driven marine protected area network planning: a successful case study from north central California |   | * |   | * | * | * |   |   |   |
| Álvarez-Romero et al., 2013 B | Groves CR, Jensen DB, Valutis LL, Redford KH, Shaffer ML, Scott JM, Baumgartner JV, Higgins JV, Beck MW, Anderson MG. 2002. Planning for biodiversity conservation: Putting conservation science into practice                                     | * | * |   | * | * | * |   |   |   |
| Álvarez-Romero et al., 2013 B | INE. 2005. Evaluación preliminar de las tasas de pérdida de la superficie de manglar en México                                                                                                                                                     |   |   |   |   |   |   |   |   | * |
| Álvarez-Romero et al., 2013 B | Lundquist CJ, Granek EF. 2005. Strategies for successful marine conservation: integrating socioeconomic, political, and scientific factors                                                                                                         |   | * |   | * | * | * |   |   |   |
| Álvarez-Romero et al., 2013 B | Morgan L, Maxwell S, Tsao F, Wilkinson TAC, Etnoyer P. 2005. Marine priority conservation areas: Baja California to the Bering Sea                                                                                                                 |   | * |   | * | * | * |   |   |   |
| Álvarez-Romero et al., 2013 B | Pomeroy R, Douvère F. 2008. The engagement of stakeholders in the marine spatial planning process                                                                                                                                                  | * | * |   | * | * | * |   |   |   |
| Álvarez-Romero et al., 2013 B | Ulloa R, Torre J, Bourillón L, Gondor A, Alcantar N. 2006. Planeación ecorregional para la conservación marina: Golfo de California y costa occidental de Baja California Sur                                                                      |   |   |   |   |   |   |   |   | * |
| Álvarez-Romero et al., 2013 F | Torre-Cosío J. Red de reservas marinas para la Región de las Grandes Islas, Golfo de California: protocolo del proyecto de planeación y reporte de los talleres del equipo de...                                                                   |   |   |   |   |   |   |   |   | * |
| Álvarez-Romero et al., 2013 F | Tuda AO, Stevens TF, Rodwell LD. 2014. Resolving coastal conflicts using marine spatial planning                                                                                                                                                   |   | * | * | * | * | * |   |   |   |
| Fisher & Dills, 2012 B        | Prendergast JR, Quinn RM, Lawton JH. 1999. The gaps between theory and practice in selecting nature reserves                                                                                                                                       | * | * |   | * | * | * |   |   |   |
| Fisher & Dills, 2012 F        | Carter SK, Keuler NS, Pidgeon AM, Radeloff VC. 2014. Evaluating the influence of conservation plans on land protection actions in Wisconsin, USA                                                                                                   |   | * | * | * |   |   |   |   |   |
| Fisher & Dills, 2012 F        | McIntosh EJ, Pressey RL, Lloyd S, Smith R, Grenyer R. 2017. The Impact of Systematic Conservation Planning                                                                                                                                         |   |   |   |   |   |   | * |   |   |
| Lagabriele et al., 2010 B     | Bourdieu P. 1987. Choses dites. Espace social et pouvoir symbolique                                                                                                                                                                                |   |   |   |   |   |   |   |   | * |
| Lagabriele et al., 2010 B     | Cowling RM. 2005. Maintaining the research-implementation continuum in conservation                                                                                                                                                                |   |   |   |   |   |   |   | * |   |
| Lagabriele et al., 2010 B     | David D, Payet D, Botta A, Lajoie G, Manglou S, Courdier R. 2007. Un couplage de dynamiques comportementales: le modèle DS pour l'aménagement du territoire                                                                                        |   |   |   |   |   |   |   | * |   |
| Lagabriele et al., 2010 B     | Driver A, Cowling R, Maze K. 2003. Planning for Living Landscapes: Perspectives and Lessons from South Africa                                                                                                                                      | * | * |   | * | * | * |   |   |   |
| Lagabriele et al., 2010 B     | Ferber J, Guérin V. 2003. Le statut épistémologique de la simulation                                                                                                                                                                               |   |   |   |   |   |   |   | * |   |
| Lagabriele et al., 2010 B     | Ferrand N. 1997. Modèles Multi-Agents pour l'aide à la décision et la négociation en aménagement du territoire                                                                                                                                     |   |   |   |   |   |   |   | * |   |
| Lagabriele et al., 2010 F     | Bousquet F, Mathevet R, Le Page C. 2014. Modélisation d'accompagnement et modèles multi-agents appliqués à la conservation de la biodiversité                                                                                                      |   |   |   |   |   |   |   | * |   |
| Lagabriele et al., 2010 F     | Bragagnolo C, Pereira M, Ng K, & ... 2016. Understanding and mapping local conflicts related to protected areas in small islands: a case study of the Azores archipelago                                                                           |   | * |   | * | * | * |   |   |   |

|                            |                                                                                                                                                                                                           |          |           |          |           |           |           |          |          |          |
|----------------------------|-----------------------------------------------------------------------------------------------------------------------------------------------------------------------------------------------------------|----------|-----------|----------|-----------|-----------|-----------|----------|----------|----------|
| Lagabrielle et al., 2010 F | Doyen L, Roche P, Tichit M. 2016. Concepts et formalismes de la durabilité pour la biodiversité et les services écosystémiques                                                                            |          |           |          |           |           |           |          |          | *        |
| Lagabrielle et al., 2010 F | Esfandeh S, Kaboli M, Eslami-Andargoli L. 2015. A Chronological review on application of MARXAN tool for systematic conservation planning in landscape                                                    |          |           |          |           |           |           | *        |          |          |
| Lagabrielle et al., 2010 F | Fernandes JP, Gracinhas N, Freire M, SoutoCruz C, & ... 2013. Relevant data and information for a comprehensive conservation planning in small islands                                                    |          | *         | *        | *         | *         | *         |          |          |          |
| Lagabrielle et al., 2010 F | IRD, UMREDEV Collaborative landscape research in Reunion Island: modelling and 'managing boundaries' to foster dialogue and knowledge integration                                                         |          |           |          |           |           |           |          | *        |          |
| Lagabrielle et al., 2010 F | Lestrelin G, Augusseau X, David D, Bourgoïn J, & ... 2017. Collaborative landscape research in Reunion Island: Using spatial modelling and simulation to support territorial foresight and urban planning |          | *         |          | *         | *         |           |          |          |          |
|                            | <b>TOTAL</b>                                                                                                                                                                                              | <b>5</b> | <b>15</b> | <b>3</b> | <b>15</b> | <b>14</b> | <b>13</b> | <b>2</b> | <b>7</b> | <b>6</b> |
